# Supplementary material for: Chemical and biological evaluation of unusual sugars, α-aculosides, as novel Michael acceptors
Source: Royal Society of Chemistry journal article supplement (doi:10.1039/c4ob01877j), 2014-01-01
Supplement: c4ob01877j1.pdf [file c4ob01877j1.pdf]

## SUPPLEMENTARY INFORMATION

### **Chemical and biological evaluation of unusual sugars, $\alpha$ -aculosides, as novel Michael acceptors**

Hiromasa Ikeda, Erika Kaneko, Shunsuke Okuzawa, Daisuke Takahashi, and  
Kazunobu Toshima\*

*Department of Applied Chemistry, Faculty of Science and Technology, Keio University,  
3-14-1 Hiyoshi, Kohoku-ku, Yokohama 223-8522, Japan.  
E-mail: toshima@aplc.keio.ac.jp; Fax: +81 45-566-1576.*

|                                                                                |         |
|--------------------------------------------------------------------------------|---------|
| 1. General methods for chemical synthesis.                                     | .....S2 |
| 2. Synthesis of vineomycin B <sub>2</sub> trisaccharide analogues <b>1-5</b> . | .....S2 |
| 3. Synthesis of aculosides <b>12</b> and <b>13</b> .                           | .....S8 |
| 4. Michael reactions of <b>12-16</b> with <b>17-19</b> .                       | ...S12  |
| 5. Synthesis of coumarin- $\alpha$ -aculoside hybrid <b>29</b> .               | ...S16  |
| 6. Michael reaction of <b>29</b> with <b>17</b> .                              | ...S20  |
| 7. Cell culture.                                                               | ...S20  |
| 8. Cell cytotoxicity assay.                                                    | ...S21  |
| 9. MALDI-TOF MS analysis.                                                      | ...S21  |
| 10. Fluorescence microscopic analysis.                                         | ...S21  |
| 11. References.                                                                | ...S22  |
| 12. <sup>1</sup> H- and <sup>13</sup> C-NMR spectra.                           | ...S23  |

## General methods for chemical synthesis.

NMR spectra were recorded on a JEOL ECA-500 (500 MHz for  $^1\text{H}$ , 125 MHz for  $^{13}\text{C}$ ) and Varian MVX-300 (300 MHz for  $^1\text{H}$ ) spectrometer.  $^1\text{H}$ -NMR data are reported as follows; chemical shift in parts per million (ppm) downfield or upfield from tetramethylsilane ( $\delta$  0.00),  $\text{CDCl}_3$  ( $\delta$  7.26), integration, multiplicity (br = broad, s = singlet, d = doublet, t = triplet, q = quartet, quin = quintet, and m = multiplet) and coupling constants (Hz).  $^{13}\text{C}$ -NMR chemical shifts are reported in ppm downfield or upfield from  $\text{CDCl}_3$  ( $\delta$  77.0). ESI-TOF Mass spectra were measured on a Waters LCT premier XE. MALDI TOF MS spectra were measured on a Bruker Ultra flex. Melting points were determined on a micro hot-stage (Yanako MP-S3). Optical rotations were measured on a JASCO P-2200 polarimeter. Silica gel TLC and column chromatography were performed using Merck TLC 60F-254 (0.25 mm) and Silica Gel 60 N (spherical, neutral, 63-210  $\mu\text{m}$ ) (Kanto Chemical Co., Inc.), respectively. Air- and/or moisture-sensitive reactions were carried out under an argon atmosphere using oven-dried glassware. In general, organic solvents were purified and dried using appropriate procedures, and evaporation and concentration were carried out under reduced pressure below 30  $^\circ\text{C}$ , unless otherwise noted.

## Synthesis of vineomycin B<sub>2</sub> trisaccharide analogues 1-5.

### Compound 7

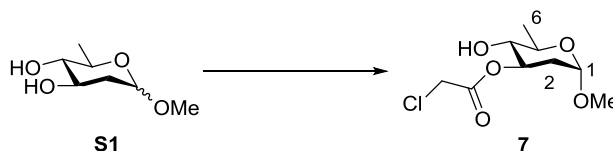

A suspension of **S1**<sup>1)</sup> (474 mg, 2.92 mmol) and  $\text{Bu}_2\text{SnO}$  (2.18 g, 8.76 mmol) in MeOH (9.48 mL) was refluxed for 2 h, and then the reaction mixture was concentrated in *vacuo*. To the residue in  $\text{CH}_2\text{Cl}_2$  (9.48 mL) were added pyridine (946  $\mu\text{L}$ , 11.7 mmol) and  $\text{ClAcCl}$  (351  $\mu\text{L}$ , 4.38 mmol) at 0  $^\circ\text{C}$ . After being stirred at 0  $^\circ\text{C}$  for 1 h, the reaction mixture was quenched with  $\text{H}_2\text{O}$  (5 mL). The resulting mixture was extracted with EtOAc (5 mL  $\times$  3). The extracts were washed with brine, dried over  $\text{Na}_2\text{SO}_4$ , filtered, and concentrated in *vacuo*. Purification of the residue by flash silica-gel column chromatography (3/1 *n*-hexane/EtOAc) gave **7** (236 mg, 0.991 mmol, 34% yield). Colorless syrup;  $R_f$  0.47 (3/1 *n*-hexane/EtOAc);  $[\alpha]_D^{26} +14.2^\circ$  (*c* 0.8,  $\text{CHCl}_3$ );  $^1\text{H}$ -NMR (300 MHz,  $\text{CDCl}_3$ , TMS)  $\delta$  5.18 (1H, ddd,  $J_{2\text{ax},3} = 11.1$  Hz,  $J_{3,4} = 9.3$  Hz,  $J_{2\text{eq},3} = 5.7$  Hz, H-3), 4.75 (1H, m, H-1), 4.14 & 4.09 (2H, ABq,  $J = 15.0$  Hz, ClAc), 3.75 (1H, dq,  $J_{4,5}$

= 9.3 Hz,  $J_{5,6} = 6.3$  Hz, H-5), 3.34 (s, 3H, OMe), 3.30 (1H, dd,  $J_{3,4} = J_{4,5} = 9.3$  Hz, H-4), 2.23 (1H, ddd,  $J_{2ax,2eq} = 12.3$  Hz,  $J_{2eq,3} = 5.7$  Hz,  $J_{1,2eq} = 1.5$  Hz, H-2eq), 1.78 (1H, ddd,  $J_{2ax,2eq} = 12.3$  Hz,  $J_{2ax,3} = 11.1$  Hz,  $J_{1,2ax} = 3.9$  Hz, H-2ax), 1.34 (3H, d,  $J_{5,6} = 6.3$  Hz, H-6);  $^{13}\text{C-NMR}$  (125 MHz,  $\text{CDCl}_3$ ); 167.7, 97.8, 75.4, 64.6, 67.7, 54.7, 40.9, 35.0, 17.7; HRMS (ESI-TOF)  $m/z$  261.0512 (261.0506 calcd for  $\text{C}_9\text{H}_{15}\text{ClO}_5\text{Na}$ ,  $[\text{M}+\text{Na}]^+$ ).

## Compound 1

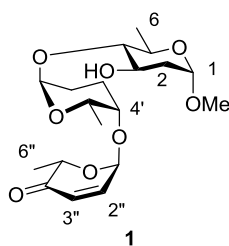

A suspension of **6**<sup>2</sup> (13.3 mg, 39.8  $\mu\text{mol}$ ), **7** (6.3 mg, 26.5  $\mu\text{mol}$ ) and MS 4A (13.3 mg) in dry  $\text{CH}_2\text{Cl}_2$  (532  $\mu\text{L}$ ) was stirred at room temperature for 30 min. And then, the suspension was cooled to  $-78$   $^\circ\text{C}$  and stirred for 30 min at the same temperature. To the mixture were added NIS (17.9 mg, 79.6  $\mu\text{mol}$ ) and a solution of TfOH in  $\text{CH}_2\text{Cl}_2$  (1.0  $\mu\text{L}$ , 79.6  $\mu\text{mol}$ ) at  $-78$   $^\circ\text{C}$ . The reaction temperature was gradually warmed to  $-40$   $^\circ\text{C}$  during 2 h. After being stirred at  $-40$   $^\circ\text{C}$  for 12 h, the reaction mixture was quenched with a solution of sat.  $\text{NaHCO}_3$  aq. / sat.  $\text{Na}_2\text{S}_2\text{O}_3$  aq. (1/1, 1 mL). The resulting mixture was extracted with EtOAc (2 mL  $\times$  3). The extracts were washed with brine, dried over  $\text{Na}_2\text{SO}_4$ , filtered, and concentrated in *vacuo*. The residue was subjected to flash silica-gel column chromatography (1/1 *n*-hexane/EtOAc) to give the crude product **8**.

To a solution of the above crude product **8** and 2,6-lutidine (11.1  $\mu\text{L}$ , 95.2  $\mu\text{mol}$ ) in DMF (770  $\mu\text{L}$ ) was added thiourea (7.3 mg, 95.2  $\mu\text{mol}$ ). After being stirred at  $60$   $^\circ\text{C}$  for 3 h, the reaction mixture was quenched with  $\text{H}_2\text{O}$  (2 mL). The resulting mixture was extracted with EtOAc (2 mL  $\times$  3). The extracts were washed with brine, dried over  $\text{Na}_2\text{SO}_4$ , filtered, and concentrated in *vacuo*. Purification of the residue by preparative TLC (1/1 *n*-hexane/EtOAc) gave **1** (6.7 mg, 17.4  $\mu\text{mol}$ , 66% yield in 2 steps). Colorless syrup;  $R_f$  0.42 (1/1 *n*-hexane/EtOAc);  $[\alpha]_D^{21} +43.5^\circ$  (*c* 0.5,  $\text{CHCl}_3$ );  $^1\text{H-NMR}$  (500 MHz,  $\text{CDCl}_3$ , TMS)  $\delta$  6.88 (1H, dd,  $J_{2'',3''} = 9.9$  Hz,  $J_{1'',2''} = 3.5$  Hz, H-2''), 6.11 (1H, m, H-3''), 5.24 (1H, d,  $J_{1'',2''} = 3.5$  Hz, H-1''), 4.96 (1H, m, H-1'), 4.76 (1H, br s, H-1), 4.57 (1H, q,  $J_{5'',6''} = 6.5$  Hz, H-5''), 4.21 (1H, dq,  $J_{5',6'} = 6.5$  Hz,  $J_{4',5'} = 1.5$  Hz, H-5'), 3.85 (1H, m, H-3), 3.69-3.63 (2H, m, H-4' & H-5), 3.33 (s, 3H, OMe), 2.98 (1H, m, H-4),

2.17 (1H, m, H-2eq), 2.15-1.50 (5H, m, H-2ax & H-2' & H-3'), 1.38 (3H, d,  $J_{5'',6''} = 6.5$  Hz, H-6''), 1.28-1.20 (6H, m, H-6 & H-6');  $^{13}\text{C-NMR}$  (125 MHz,  $\text{CDCl}_3$ ); 196.6, 142.8, 127.5, 120.1, 99.2, 98.3, 95.4, 89.1, 76.3, 70.7, 67.6, 65.5, 54.7, 36.7, 25.2, 24.4, 18.1, 17.0, 15.2; HRMS (ESI-TOF)  $m/z$  387.2016 (387.2019 calcd for  $\text{C}_{19}\text{H}_{31}\text{O}_8$ ,  $[\text{M}+\text{H}]^+$ ).

## Compound 2

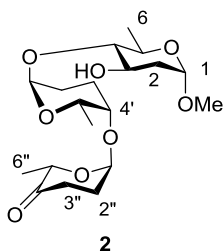

A suspension of **1** (5.5 mg, 14.2  $\mu\text{mol}$ ) and 10% Pd/C (2.8 mg) in EtOH (275  $\mu\text{L}$ ) was stirred under  $\text{H}_2$  atmosphere (balloon) at room temperature for 8 h. The mixture was filtered through celite pad, and the filtrate was concentrated in *vacuo*. Purification of the residue by flash silica-gel column chromatography (1/1 *n*-hexane/EtOAc) gave **2** (4.2 mg, 10.8  $\mu\text{mol}$ , 76% yield). Colorless syrup;  $R_f$  0.25 (1/1 *n*-hexane/EtOAc);  $[\alpha]_{\text{D}}^{24} -98.2^\circ$  (*c* 1.0,  $\text{CHCl}_3$ );  $^1\text{H-NMR}$  (300 MHz,  $\text{CDCl}_3$ , TMS)  $\delta$  5.22 (1H, br d,  $J = 3.6$  Hz, H-1''), 4.93 (1H, m, H-1'), 4.73 (1H, br d,  $J = 3.0$  Hz, H-1), 4.35 (1H, m, H-5''), 4.22-4.10 (1H, m, H-5'), 3.84 (1H, ddd,  $J_{2\text{ax},3} = 11.5$  Hz,  $J_{3,4} = 9.2$  Hz,  $J_{2\text{eq},3} = 5.4$  Hz, H-3), 3.73-3.60 (2H, m, H-4' & H-5), 3.32 (s, 3H, OMe), 2.98 (1H, m, H-4), 2.57-1.50 (10H, m, H-2 & H-2' & H-2'' & H-3' & H-3''), 1.33-1.08 (9H, m, H-6 & H-6' & H-6'');  $^{13}\text{C-NMR}$  (125 MHz,  $\text{CDCl}_3$ ); 210.9, 99.3, 99.1, 98.3, 89.0, 74.8, 71.2, 67.9, 67.6, 65.5, 54.7, 36.6, 33.6, 28.4, 25.3, 24.5, 18.1, 17.0, 14.9; HRMS (ESI-TOF)  $m/z$  411.2097 (411.2100 calcd for  $\text{C}_{19}\text{H}_{32}\text{O}_8\text{Na}$ ,  $[\text{M}+\text{Na}]^+$ ).

## Compound 3

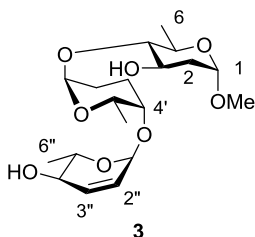

A suspension of **1** (14.7 mg, 38.1  $\mu\text{mol}$ ) in dry  $\text{CH}_2\text{Cl}_2$  (588  $\mu\text{L}$ ) was cooled to  $-78\text{ }^\circ\text{C}$  and stirred for 30 min at the same temperature. To the mixture were added  $\text{NaBH}_4$  (4.3 mg, 114  $\mu\text{mol}$ ) and 0.4 M  $\text{CeCl}_3$  in MeOH (57.3  $\mu\text{L}$ , 229  $\mu\text{mol}$ ) at  $-78\text{ }^\circ\text{C}$ . The reaction temperature was gradually warmed to  $-60\text{ }^\circ\text{C}$  during 15 min. After being stirred at  $-60\text{ }^\circ\text{C}$  for 2 h, the reaction mixture was quenched with  $\text{H}_2\text{O}$  (2 mL). The resulting mixture was extracted with EtOAc (2 mL  $\times$  3). The extracts were washed with brine, dried over  $\text{Na}_2\text{SO}_4$ , filtered, and concentrated in *vacuo*. Purification of the residue by flash silica-gel column chromatography (1/1 *n*-hexane/EtOAc) gave **3** (12.7 mg, 32.7  $\mu\text{mol}$ , 86% yield). Colorless syrup;  $R_f$  0.67 (1/1 *n*-hexane/EtOAc);  $[\alpha]_D^{25} -1.9^\circ$  (*c* 0.6,  $\text{CHCl}_3$ );  $^1\text{H-NMR}$  (300 MHz,  $\text{CDCl}_3$ , TMS)  $\delta$  5.96-5.77 (2H, m, H-2'' & H-3''), 4.98-4.71 (3H, m, H-1 & H-1' & H-1''), 4.22-3.42 (6H, m, H-3 & H-4' & H-4'' & H-5 & H-5' & H-5''), 3.32 (s, 3H, OMe), 3.29 (1H, m, H-4), 2.21 (1H, m, H-2eq), 2.07-1.50 (5H, m, H-2ax & H-2' & H-3'), 1.40-1.03 (9H, m, H-6 & H-6' & H-6'');  $^{13}\text{C-NMR}$  (125 MHz,  $\text{CDCl}_3$ ); 133.4, 126.6, 99.3, 98.3, 96.6, 89.0, 75.7, 69.7, 68.3, 68.0, 67.6, 65.6, 54.8, 36.7, 25.2, 24.8, 18.1, 18.0, 17.1; HRMS (ESI-TOF)  $m/z$  411.1988 (411.1995 calcd for  $\text{C}_{19}\text{H}_{32}\text{O}_8\text{Na}$ ,  $[\text{M}+\text{Na}]^+$ ).

#### Compound 4

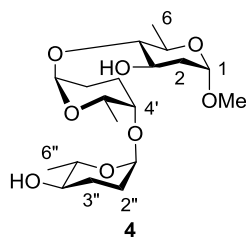

To a solution of **3** (8.3 mg, 21.4  $\mu\text{mol}$ ) in  $\text{CH}_2\text{Cl}_2$  (332  $\mu\text{L}$ ) were added *o*-nitrobenzene sulfonylhydrazide (28.0 mg, 129  $\mu\text{mol}$ ) and  $\text{Et}_3\text{N}$  (23.8  $\mu\text{l}$ , 171  $\mu\text{mol}$ ). After being stirred at room temperature for 12 h, the reaction mixture was quenched with  $\text{H}_2\text{O}$  (2 mL). The resulting mixture was extracted with EtOAc (2 mL  $\times$  3). The extracts were washed with brine, dried over  $\text{Na}_2\text{SO}_4$ , filtered, and concentrated in *vacuo*. Purification of the residue by preparative TLC (1/1 *n*-hexane/EtOAc) gave **4** (6.3 mg, 16.1  $\mu\text{mol}$ , 75% yield). Colorless syrup;  $R_f$  0.25 (1/1 *n*-hexane/EtOAc);  $[\alpha]_D^{21} -36.2^\circ$  (*c* 0.7,  $\text{CHCl}_3$ );  $^1\text{H-NMR}$  (300 MHz,  $\text{CDCl}_3$ , TMS)  $\delta$  4.98 (1H, br d,  $J = 3.6\text{ Hz}$ , H-1''), 4.92 (1H, m, H-1'), 4.73 (1H, br d,  $J = 3.0\text{ Hz}$ , H-1), 4.16 (1H, m, H-5'), 3.83 (1H, m, H-3), 3.90-3.51 (3H, m, H-4'' & H-5 & H-5''), 3.32 (s, 3H, OMe), 3.29 (1H, m, H-4'), 2.97 (1H, m, H-4), 2.23-1.51 (10H, m, H-2 & H-2' & H-2'' & H-3' & H-3''),

1.38-1.08 (9H, m, H-6 & H-6' & H-6''); <sup>13</sup>C-NMR (125 MHz, CDCl<sub>3</sub>); 99.3, 98.7, 98.3, 89.0, 74.5, 72.2, 70.3, 68.2, 67.6, 65.5, 54.7, 36.7, 29.8, 27.9, 25.4, 24.3, 18.1, 17.8, 17.0; HRMS (ESI-TOF) *m/z* 413.2133 (413.2155 calcd for C<sub>19</sub>H<sub>34</sub>O<sub>8</sub>Na, [M+Na]<sup>+</sup>).

## Compound 10

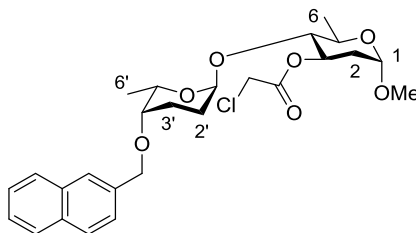

10

A suspension of **9**<sup>2</sup> (17.7 mg, 48.5 μmol), **7** (7.7 mg, 32.3 μmol) and MS 4A (17.6 mg) in dry CH<sub>2</sub>Cl<sub>2</sub> (708 μL) was stirred at room temperature for 30 min. And then, the suspension was cooled to -78 °C and stirred for 30 min at the same temperature. To the mixture were added NIS (21.8 mg, 97.0 mmol) and a solution of TfOH in CH<sub>2</sub>Cl<sub>2</sub> (1.0 μL, 0.97 mM) at -78 °C. The reaction mixture was gradually warmed to -40 °C during 2 h. After being stirred at -40 °C for 12 h, the reaction mixture was quenched with a solution of sat. NaHCO<sub>3</sub> aq./sat. Na<sub>2</sub>S<sub>2</sub>O<sub>3</sub> aq. (1/1, 2 mL). The resulting mixture was extracted with EtOAc (2 mL × 3). The extracts were washed with brine, dried over Na<sub>2</sub>SO<sub>4</sub>, filtered, and concentrated in *vacuo*. Purification of the residue by flash silica-gel column chromatography (3/1 *n*-hexane-EtOAc) gave **10** (13.1 mg, 26.6 μmol, 83% yield). Colorless syrup; *R<sub>f</sub>* 0.67 (3/1 *n*-hexane-EtOAc); [α]<sub>D</sub><sup>21</sup> +28.3° (*c* 0.9, CHCl<sub>3</sub>); <sup>1</sup>H-NMR (500 MHz, CDCl<sub>3</sub>, TMS) δ 7.86-7.70 (4H, m, ArH), 7.52-7.44 (3H, m, ArH), 5.26 (1H, ddd, *J*<sub>2ax,3</sub> = 11.4 Hz, *J*<sub>3,4</sub> = 9.3 Hz, *J*<sub>2eq,3</sub> = 5.4 Hz, H-3), 4.94 (1H, br s, H-1'), 4.72 (1H, br d, *J* = 3.3 Hz, H-1), 4.14 & 4.09 (2H, ABq, *J* = 12.3 Hz, ArCH<sub>2</sub>), 4.14 & 4.04 (2H, ABq, *J* = 14.9 Hz, ClAc), 3.97-3.92 (1H, m, H-5'), 3.75 (1H, dq, *J*<sub>4,5</sub> = 9.2 Hz, *J*<sub>5,6</sub> = 6.5 Hz, H-5), 3.31 (3H, s, OMe), 3.30 (2H, m, H-4 & H-4'), 2.23 (1H, m, H-2eq), 2.10-1.46 (5H, m, H-2ax & H-2' & H-3'), 1.29 (3H, d, *J*<sub>5,6</sub> = 6.5 Hz, H-6), 1.18 (3H, d, *J*<sub>5',6'</sub> = 6.5 Hz, H-6''); <sup>13</sup>C-NMR (125 MHz, CDCl<sub>3</sub>); 167.6, 136.8, 134.0, 133.8, 129.0, 128.7, 128.5, 127.0, 126.9×2, 126.7, 99.8, 98.5, 82.4, 74.3, 73.6, 72.0, 68.4, 67.5, 55.5, 42.1, 36.1, 25.6, 21.8, 19.2, 18.1; HRMS (ESI-TOF) *m/z* 515.1915 (515.1923 calcd for C<sub>26</sub>H<sub>33</sub>ClO<sub>7</sub>Na, [M+Na]<sup>+</sup>).

## Compound 11

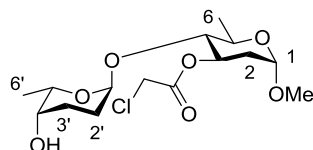

11

To a two-phase mixture of **10** (20.0 mg, 40.6  $\mu\text{mol}$ ) in  $\text{CH}_2\text{Cl}_2$  (4.06 mL) and 0.1 M phosphate buffer (pH 7.2, 5.08 mL) was added DDQ (18.4 mg, 81.2  $\mu\text{mol}$ ). After being stirred at room temperature for 12 h, the reaction mixture was quenched with sat.  $\text{NaHCO}_3$  aq. (5 mL). The resulting mixture was extracted with  $\text{CHCl}_3$  (5 mL  $\times$  3). The extracts were washed with brine, dried over  $\text{Na}_2\text{SO}_4$ , filtered, and concentrated in *vacuo*. Purification of the residue by flash column chromatography (1/1 *n*-hexane-EtOAc) gave **11** (8.7 mg, 24.8  $\mu\text{mol}$ , 61 % yield). Colorless syrup;  $R_f$  0.10 (1/1 *n*-hexane/EtOAc);  $[\alpha]_D^{23} +21.4^\circ$  (*c* 0.5,  $\text{CHCl}_3$ );  $^1\text{H-NMR}$  (500 MHz,  $\text{CDCl}_3$ , TMS)  $\delta$  5.27 (1H, ddd,  $J_{2\text{ax},3} = 11.5$  Hz,  $J_{3,4} = 9.2$  Hz,  $J_{2\text{eq},3} = 5.5$  Hz, H-3), 4.92 (1H, br s, H-1'), 4.72 (1H, br d,  $J = 2.5$  Hz, H-1), 4.09 & 4.06 (2H, ABq,  $J = 15.0$  Hz, ClAc), 4.02-3.97 (1H, m, H-5'), 3.75 (1H, dq,  $J_{4,5} = 9.2$  Hz,  $J_{5,6} = 6.5$  Hz, H-5), 3.55 (1H, m, H-4'), 3.32 (1H, m, H-4), 3.30 (s, 3H, OMe), 2.23 (1H, ddd,  $J_{2\text{ax},2\text{eq}} = 13.0$  Hz,  $J_{2\text{eq},3} = 5.5$  Hz,  $J_{1,2\text{eq}} = 1.0$  Hz, H-2eq), 2.02-1.48 (5H, m, H-2ax & H-2' & H-3'), 1.29 (3H, d,  $J_{5,6} = 6.5$  Hz, H-6), 1.13 (3H, d,  $J_{5',6'} = 6.5$  Hz, H-6');  $^{13}\text{C-NMR}$  (125 MHz,  $\text{CDCl}_3$ ); 166.7, 98.8, 97.7, 81.6, 72.9, 67.4, 67.2, 66.6, 54.7, 41.2, 35.2, 25.4, 24.2, 18.4, 17.0; HRMS (ESI-TOF)  $m/z$  375.1289 (375.1291 calcd for  $\text{C}_{15}\text{H}_{25}\text{ClO}_7\text{Na}$ ,  $[\text{M}+\text{Na}]^+$ ).

## Compound 5

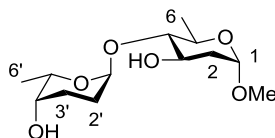

5

To a solution of **11** (14.3 mg, 40.6  $\mu\text{mol}$ ) and 2,6-lutidine (18.8  $\mu\text{L}$ , 162  $\mu\text{mol}$ ) in DMF (204  $\mu\text{L}$ ) was added thiourea (12.3 mg, 162  $\mu\text{mol}$ ). After being stirred at 60  $^\circ\text{C}$  for 3 h, the reaction mixture was quenched with  $\text{H}_2\text{O}$  (1 mL). The resulting mixture was extracted with EtOAc (2 mL  $\times$  3). The extracts were washed with brine, dried over  $\text{Na}_2\text{SO}_4$ , filtered, and concentrated in *vacuo*. Purification of the residue by preparative TLC (10/1  $\text{CHCl}_3/\text{MeOH}$ ) gave **5** (7.2 mg, 26.0  $\mu\text{mol}$ , 64% yield). Colorless syrup;  $R_f$  0.67 (10/1  $\text{CHCl}_3/\text{MeOH}$ );  $[\alpha]_D^{23} +25.6^\circ$  (*c* 0.5,  $\text{CHCl}_3$ );

$^1\text{H-NMR}$  (300 MHz,  $\text{CDCl}_3$ , TMS)  $\delta$  4.94 (1H, br s, H-1'), 4.74 (1H, br d,  $J = 3.3$  Hz, H-1), 4.21 (1H, m, H-5'), 3.85 (1H, ddd,  $J_{2\text{ax},3} = 11.5$  Hz,  $J_{3,4} = 9.2$  Hz,  $J_{2\text{eq},3} = 5.4$  Hz, H-3), 3.75 (2H, m, H-5 & H-4'), 3.31 (s, 3H, OMe), 2.98 (1H, m, H-4), 2.18 (1H, m, H-2eq), 2.06-1.50 (5H, m, H-2ax & H-2' & H-3'), 1.35-1.20 (6H, m, H-6 & H-6');  $^{13}\text{C-NMR}$  (125 MHz,  $\text{CDCl}_3$ ); 99.4, 98.3, 89.2, 68.0, 67.6, 67.4, 65.5, 54.7, 36.7, 25.5, 24.3, 18.1, 17.0; HRMS (ESI-TOF)  $m/z$  299.1573 (299.1570 calcd for  $\text{C}_{13}\text{H}_{25}\text{O}_6\text{Na}$ ,  $[\text{M}+\text{Na}]^+$ ).

## Synthesis of aculosides 12 and 13.

Scheme S1. Synthesis of aculosides 12 and 13.

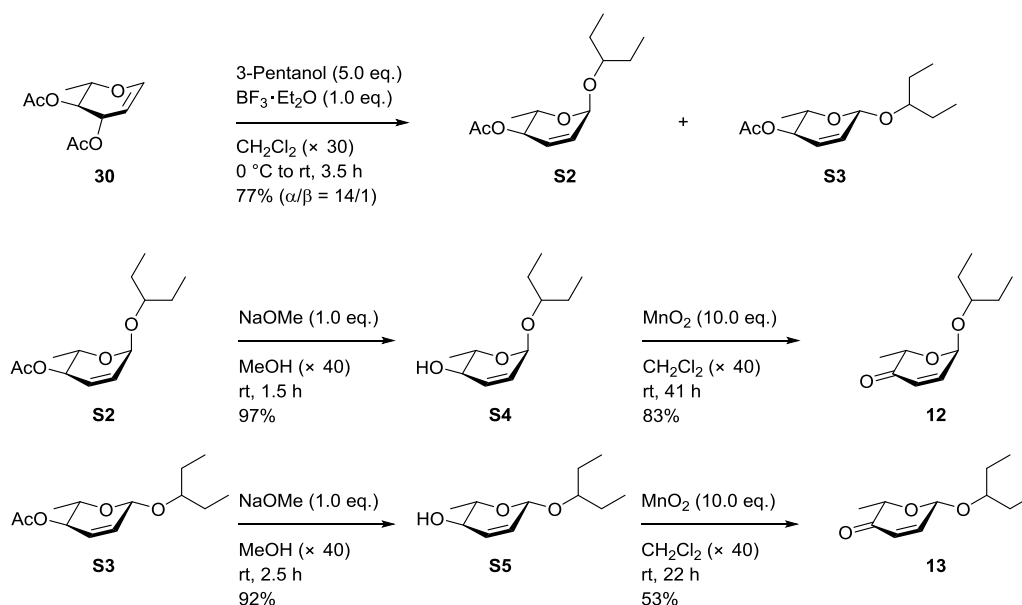

## Compounds S2 and S3

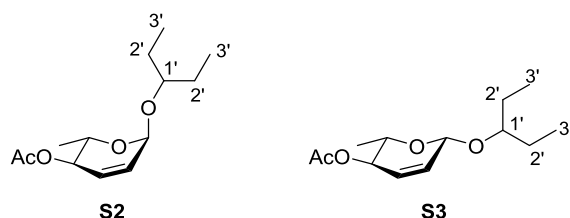

To a solution of **30**<sup>3</sup> (11.6 g, 54.0 mmol) and 3-pentanol (29.1 mL, 270 mmol) in dry  $\text{CH}_2\text{Cl}_2$  (350 mL) was added  $\text{BF}_3 \cdot \text{Et}_2\text{O}$  (6.84 mL, 54.0 mmol) at  $0^\circ\text{C}$ . After being stirred at room



temperature for 3.5 h, the reaction mixture was quenched with sat. NaHCO<sub>3</sub> aq. (100 mL). The resulting mixture was extracted with CHCl<sub>3</sub> (300 mL × 3). The extracts were washed with brine, dried over Na<sub>2</sub>SO<sub>4</sub>, filtered, and concentrated in *vacuo*. Purification of the residue by flash silica-gel column chromatography (80/1 CHCl<sub>3</sub>/EtOAc) gave **S2** (9.34 g, 38.6 mmol, 72% yield) and **S3** (653 mg, 2.70 mmol, 5% yield). **S2**: Colorless syrup; *R<sub>f</sub>* 0.61 (3/1 *n*-hexane/EtOAc); [α]<sub>D</sub><sup>27</sup> -144° (*c* 0.88, CHCl<sub>3</sub>); <sup>1</sup>H-NMR (300 MHz, CDCl<sub>3</sub>, TMS) δ 5.80 (2H, m, H-2 & H-3), 5.04 (2H, m, H-1 & H-4), 4.03 (1H, dq, *J*<sub>4,5</sub> = 9.0 Hz, *J*<sub>5,6</sub> = 6.3 Hz, H-5), 3.54 (1H, quin, *J*<sub>1',2'</sub> = 6.0 Hz, H-1'), 2.08 (3H, s, Ac), 1.59-1.48 (4H, m, H-2'), 1.21 (3H, d, *J*<sub>5,6</sub> = 6.3 Hz, H-6), δ 0.95 & 0.90 (each 3H, t, *J*<sub>2',3'</sub> = 7.5 Hz, H-3'); <sup>13</sup>C-NMR (125 MHz, CDCl<sub>3</sub>); δ 170.5, 129.4, 128.1, 93.4, 81.0, 70.9, 64.7, 27.3, 26.4, 21.1, 17.8, 9.9, 9.5; HRMS (ESI-TOF) *m/z* 265.1410 (265.1416 calcd. for C<sub>13</sub>H<sub>22</sub>O<sub>4</sub>Na, [M+Na]<sup>+</sup>). **S3**: Colorless syrup; *R<sub>f</sub>* 0.61 (3/1 *n*-hexane/EtOAc); [α]<sub>D</sub><sup>28</sup> -85.4° (*c* 0.72, CHCl<sub>3</sub>); <sup>1</sup>H-NMR (300 MHz, CDCl<sub>3</sub>, TMS) δ 5.89 (2H, m, H-2 & H-3), 5.17 (1H, d, *J*<sub>1,2</sub> = 1.5 Hz, H-1), 5.06 (1H, dd, *J*<sub>4,5</sub> = 6.3 Hz, *J*<sub>3,4</sub> = 1.8 Hz, H-4), 3.83 (1H, dq, *J*<sub>4,5</sub> = *J*<sub>5,6</sub> = 6.3 Hz, H-5), 3.59 (1H, quin, *J*<sub>1',2'</sub> = 6.0 Hz, H-1'), 2.08 (3H, s, Ac), 1.65-1.48 (4H, m, H-2'), 1.30 (3H, d, *J*<sub>5,6</sub> = 6.3 Hz, H-6), 0.91 & 0.90 (each 3H, t, *J*<sub>2',3'</sub> = 7.8 Hz, H-3'); <sup>13</sup>C-NMR (125 MHz, CDCl<sub>3</sub>); δ 170.5, 131.3, 127.2, 95.4, 81.1, 71.1, 69.8, 27.1, 25.8, 21.1, 18.7, 9.8, 9.3; HRMS (ESI-TOF) *m/z* 265.1427 (265.1416 calcd. for C<sub>13</sub>H<sub>22</sub>O<sub>4</sub>Na, [M+Na]<sup>+</sup>).

#### Compound S4

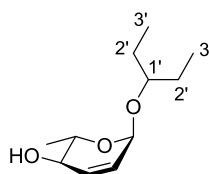

**S4**

To a solution of **S2** (2.00 g, 8.26 mmol) in MeOH (38.7 mL) was added 0.2 M NaOMe in MeOH (41.3 mL, 8.26 mmol) at room temperature. After being stirred at room temperature for 1.5 h, the reaction mixture was quenched with Amberlite<sup>®</sup> IR 120 H<sup>+</sup> form. The resulting suspension was filtered, and then the filtrate was concentrated in *vacuo*. Purification of the residue by silica-gel column chromatography (2/1 *n*-hexane/EtOAc) gave **S4** (1.68 g, 8.01 mmol, 97% yield). Colorless syrup; *R<sub>f</sub>* 0.51 (2/1 *n*-hexane/EtOAc); [α]<sub>D</sub><sup>26</sup> -69.5° (*c* 0.60, CHCl<sub>3</sub>); <sup>1</sup>H-NMR (300 MHz, CDCl<sub>3</sub>, TMS) δ 5.96-5.88 (1H, m, H-2), 5.78-5.72 (1H, m, H-3), 5.01 (1H, m, H-1), 3.86-3.71 (2H, m, H-4 & H-1'), 3.54 (1H, dq, *J*<sub>4,5</sub> = 6.9 Hz, *J*<sub>5,6</sub> = 5.7 Hz, H-5), 1.58-1.47 (4H, m, H-2'), 1.31 (3H, d, *J*<sub>5,6</sub> = 5.7 Hz, H-6), 0.95 & 0.90 (each 3H, t, *J*<sub>2',3'</sub> = 7.5 Hz,

H-3');  $^{13}\text{C}$ -NMR (125 MHz,  $\text{CDCl}_3$ );  $\delta$  133.3, 127.0, 93.4, 81.0, 69.7, 68.0, 27.3, 26.5, 17.8, 10.0, 9.5; HRMS (ESI-TOF)  $m/z$  223.1307 (223.1310 calcd. for  $\text{C}_{11}\text{H}_{20}\text{O}_3\text{Na}$ ,  $[\text{M}+\text{Na}]^+$ ).

### Compound 12

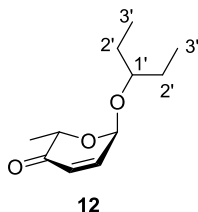

To a solution of **S4** (1.63 g, 8.14 mmol) in dry  $\text{CH}_2\text{Cl}_2$  (65.0 mL) was added  $\text{MnO}_2$  (7.08 g, 81.4 mmol) at room temperature. After being stirred at room temperature for 41 h, the mixture was filtered through a pad of Celite. The filtrate was concentrated in *vacuo*. Purification of the residue by silica-gel column chromatography (8/1 *n*-hexane/EtOAc) gave **12** (1.34 g, 6.76 mmol, 83% yield). Colorless syrup;  $R_f$  0.84 (2/1 *n*-hexane/EtOAc);  $[\alpha]_D^{24}$   $-16.3^\circ$  ( $c$  0.55,  $\text{CHCl}_3$ );  $^1\text{H}$ -NMR (300 MHz,  $\text{CDCl}_3$ , TMS)  $\delta$  6.82 (1H, dd,  $J_{2,3} = 10.2$  Hz,  $J_{1,2} = 3.3$  Hz, H-2), 6.06 (1H, d,  $J_{2,3} = 10.2$  Hz, H-3), 5.26 (1H, d,  $J_{1,2} = 3.3$  Hz, H-1), 4.62 (1H, q,  $J_{5,6} = 6.9$  Hz, H-5), 3.63 (1H, quin,  $J_{1',2'} = 5.7$  Hz, H-1'), 1.63-1.54 (4H, m, H-2'), 1.37 (3H, d,  $J_{5,6} = 6.9$  Hz, H-6), 0.95 & 0.92 (each 3H, t,  $J_{2',3'} = 7.5$  Hz, H-3');  $^{13}\text{C}$ -NMR (125 MHz,  $\text{CDCl}_3$ );  $\delta$  197.3, 143.9, 127.0, 92.3, 81.6, 70.3, 64.7, 27.0, 26.0, 15.1, 9.8, 9.3; HRMS (ESI-TOF)  $m/z$  199.1344 (199.1334 calcd. for  $\text{C}_{11}\text{H}_{19}\text{O}_3$ ,  $[\text{M}+\text{H}]^+$ ).

### Compound S5

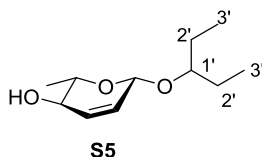

To a solution of **S3** (620 mg, 2.56 mmol) in MeOH (12.0 mL) was added 0.2 M NaOMe in MeOH (12.8 mL, 2.56 mmol) at room temperature. After being stirred at room temperature for 2.5 h, the reaction mixture was quenched with Amberlite<sup>®</sup> IR 120  $\text{H}^+$  form. The resulting suspension was filtered, and then the filtrate was concentrated in *vacuo*. Purification of the

residue by silica-gel column chromatography (2/1 *n*-hexane/EtOAc) gave **S5** (472 mg, 2.36 mmol, 92% yield). Colorless syrup;  $R_f$  0.51 (2/1 *n*-hexane/EtOAc);  $[\alpha]_D^{26} -13.1^\circ$  (*c* 1.0, CHCl<sub>3</sub>); <sup>1</sup>H-NMR (300 MHz, CDCl<sub>3</sub>, TMS)  $\delta$  5.95-5.89 (1H, m, H-2), 5.79-5.75 (1H, m, H-3), 5.14 (1H, m, H-1), 3.98-3.88 (1H, m, H-4), 3.58 (2H, m, H-5 & H-1'), 1.67-1.50 (4H, m, H-2'), 1.35 (3H, d,  $J_{5,6} = 6.3$  Hz, H-6), 0.91 & 0.90 (each 3H, t,  $J_{2',3'} = 7.2$  Hz, H-3'); <sup>13</sup>C-NMR (125 MHz, CDCl<sub>3</sub>);  $\delta$  131.7, 129.7, 96.2, 81.3, 74.3, 68.7, 27.2, 26.0, 18.4, 9.8, 9.3; HRMS (ESI-TOF)  $m/z$  223.1314 (223.1310 calcd. for C<sub>11</sub>H<sub>7</sub>O<sub>3</sub>Na, [M+Na]<sup>+</sup>).

### Compound 13

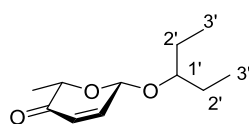

13

To a solution of **S5** (472 mg, 2.36 mmol) in dry CH<sub>2</sub>Cl<sub>2</sub> (18.0 mL) was added MnO<sub>2</sub> (2.05 g, 23.6 mmol) at room temperature. After being stirred at room temperature for 22 h, the mixture was filtered through a pad of Celite. The filtrate was concentrated in *vacuo*. Purification of the residue by silica-gel column chromatography (8/1 *n*-hexane/EtOAc) gave **13** (248 mg, 12.5 mmol, 53% yield). Colorless syrup;  $R_f$  0.84 (2/1 *n*-hexane/EtOAc);  $[\alpha]_D^{28} -2.2^\circ$  (*c* 0.28, CHCl<sub>3</sub>); <sup>1</sup>H-NMR (300 MHz, CDCl<sub>3</sub>, TMS)  $\delta$  6.89 (1H, dd,  $J_{2,3} = 10.5$  Hz,  $J_{1,2} = 1.8$  Hz, H-2), 6.11 (1H, dd,  $J_{2,3} = 10.5$  Hz,  $J_{1,3} = 1.5$  Hz, H-3), 5.40-5.38 (1H, m, H-1), 4.16 (1H, q,  $J_{5,6} = 6.6$  Hz, H-5), 3.67 (1H, quin,  $J_{1',2'} = 6.0$  Hz, H-1'), 1.68-1.53 (4H, m, H-2'), 1.46 (3H, d,  $J_{5,6} = 6.6$  Hz, H-6), 0.95 & 0.92 (each 3H, t,  $J_{2',3'} = 7.5$  Hz, H-3'); <sup>13</sup>C-NMR (125 MHz, CDCl<sub>3</sub>);  $\delta$  197.1, 147.9, 128.1, 95.2, 82.0, 75.1, 27.0, 25.7, 16.8, 9.6, 9.2; HRMS (ESI-TOF)  $m/z$  199.1333 (199.1334 calcd. for C<sub>11</sub>H<sub>19</sub>O<sub>3</sub>, [M+H]<sup>+</sup>).

## Michael reactions of 12-16 with 17-19.

Scheme S2. Michael reactions of 12-16 with 17.

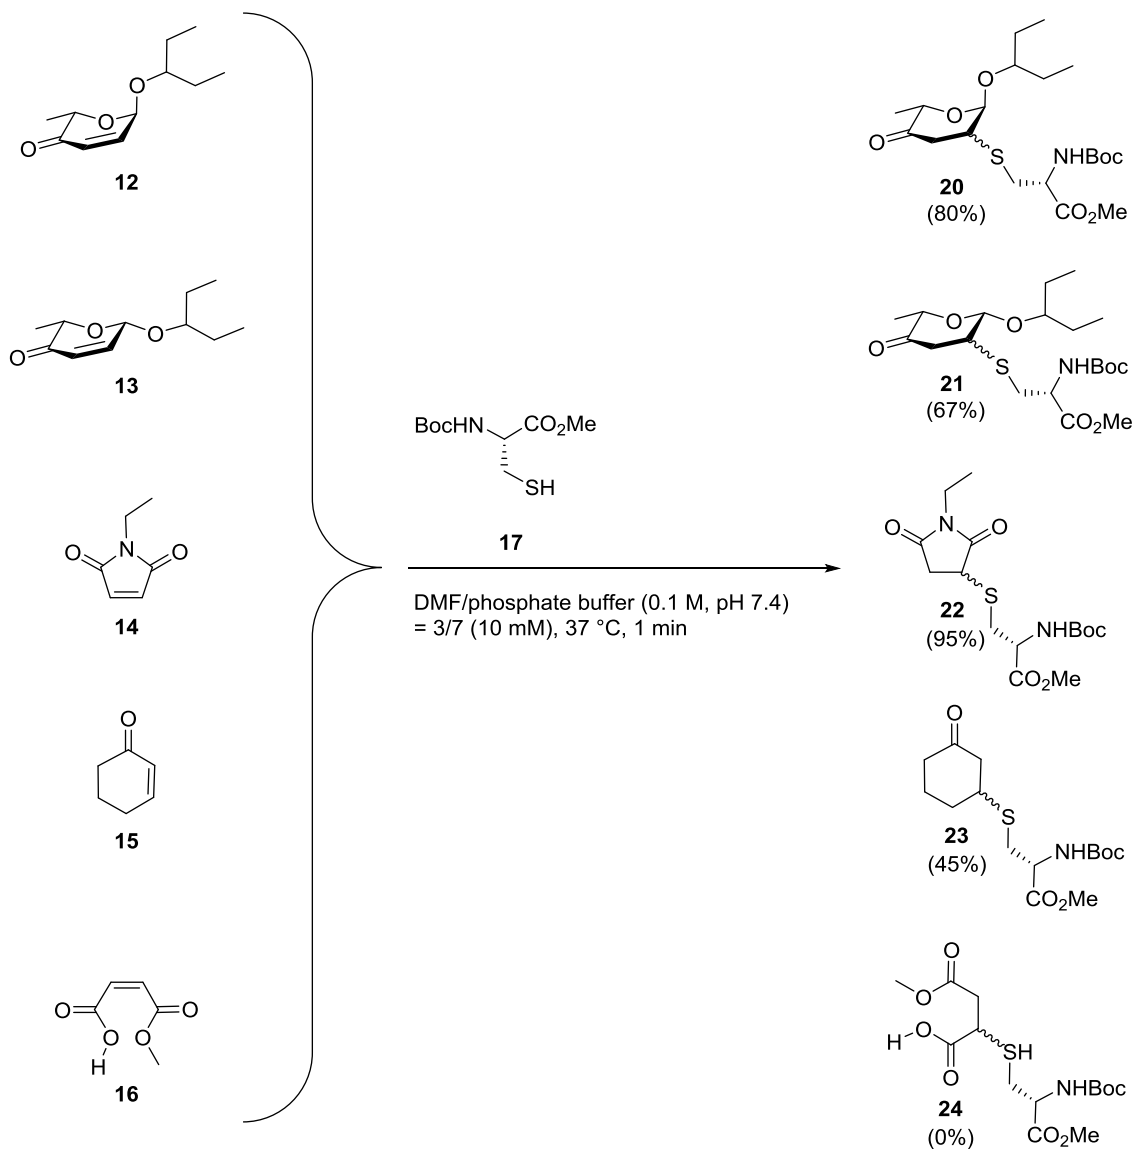

### Compound 20

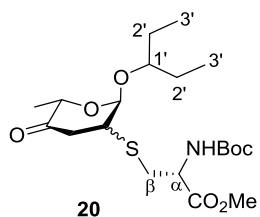

To a solution of **17** (24.5 mg, 104  $\mu\text{mol}$ ) in DMF (2.12 mL)/phosphate buffer (0.1 M, pH 7.4, 7.28 mL) was added **12** in DMF (1.00 mL, 104  $\mu\text{mol}$ ) at 37  $^{\circ}\text{C}$ . After being stirred at 37  $^{\circ}\text{C}$  for 1 min, the reaction mixture was quenched with 2-iodoacetamide<sup>4</sup> (96.2 mg, 520  $\mu\text{mol}$ ). The resulting mixture was stirred at 37  $^{\circ}\text{C}$  for 10 min, and then poured into sat.  $\text{Na}_2\text{S}_2\text{O}_3$  aq. (25 mL). The resulting mixture was extracted with EtOAc (25 mL  $\times$  3). The extracts were washed with brine, dried over  $\text{Na}_2\text{SO}_4$ , filtered, and concentrated in *vacuo*. Purification of the residue by silica-gel column chromatography (3/1 *n*-hexane/EtOAc) gave **20** as a mixture of inseparable diastereomers (36.0 mg, 83.2  $\mu\text{mol}$ , 80% yield, 13/1 dr). White solid;  $R_f$  0.47 (3/1 *n*-hexane/EtOAc);  $^1\text{H-NMR}$  (500 MHz,  $\text{CDCl}_3$ , TMS)  $\delta$  5.46 (13/14H, d,  $J = 7.7$  Hz, NH), 5.38-5.30 (1/14H, d,  $J = 6.6$  Hz, NH), 5.02 (1/14H, d,  $J_{1,2} = 2.6$  Hz, H-1), 4.99 (13/14H, d,  $J_{1,2} = 5.2$  Hz, H-1), 4.61-4.48 (1H, m, H- $\alpha$ ), 4.30 (1/14H, m, H-5), 4.24 (13/14H, q,  $J_{5,6} = 6.9$  Hz, H-5), 3.76 (3H, s,  $\text{CO}_2\text{Me}$ ), 3.65-3.58 (1H, m, H-1'), 3.20-2.95 (3H, m, H- $\beta$  & H-2), 2.87-2.69 (1/7H, m, H-3), 2.74 (13/14H, dd,  $J_{3a,3b} = 16.1$  Hz,  $J_{2,3a} = 4.6$  Hz, H-3a), 2.58 (13/14H, dd,  $J_{3a,3b} = 16.1$  Hz,  $J_{2,3b} = 10.3$  Hz, H-3b), 1.65-1.53 (4H, m, H-2'), 1.45 (9H, s, Boc), 1.28 (39/14H, d,  $J_{5,6} = 6.9$  Hz, H-6), 1.27 (3/14H, m, H-6), 0.99-0.82 (3/7H, m, H-3'), 0.93 (39/7H, t,  $J_{2',3'} = 7.5$  Hz, H-3');  $^{13}\text{C-NMR}$  (125 MHz,  $\text{CDCl}_3$ ), major isomer;  $\delta$  208.9, 171.1, 155.1, 99.9, 80.2, 79.9, 71.1, 53.6, 52.6, 44.6, 41.0, 33.7, 28.3, 26.7, 25.5, 14.8, 9.9, 9.3; HRMS (ESI-TOF)  $m/z$  456.2020 (456.2032 calcd. for  $\text{C}_{20}\text{H}_{35}\text{NO}_7\text{NaS}$ ,  $[\text{M}+\text{Na}]^+$ ).

## Compound 21

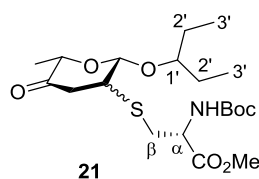

To a solution of **17** (24.5 mg, 104  $\mu\text{mol}$ ) in DMF (2.12 mL)/phosphate buffer (0.1 M, pH 7.4, 7.28 mL) was added **13** in DMF (1.00 mL, 104  $\mu\text{mol}$ ) at 37  $^{\circ}\text{C}$ . After being stirred at 37  $^{\circ}\text{C}$  for 1 min, the reaction mixture was quenched with 2-iodoacetamide (96.2 mg, 520  $\mu\text{mol}$ ). The resulting mixture was stirred at 37  $^{\circ}\text{C}$  for 10 min, and then poured into sat.  $\text{Na}_2\text{S}_2\text{O}_3$  aq. (25 mL). The resulting mixture was extracted with EtOAc (25 mL  $\times$  3). The extracts were washed with brine, dried over  $\text{Na}_2\text{SO}_4$ , filtered, and concentrated in *vacuo*. Purification of the residue by silica-gel column chromatography (3/1 *n*-hexane/EtOAc) gave **21** as a mixture of diastereomers (30.2 mg, 69.7  $\mu\text{mol}$ , 67% yield, 4/1 dr). Colorless syrup;  $R_f$  0.47 (major isomer), 0.41 (minor isomer) (3/1 *n*-hexane/EtOAc);  $^1\text{H-NMR}$  (500 MHz,  $\text{CDCl}_3$ , TMS)  $\delta$  5.43-5.37 (1/5H, m, NH),

5.30 (4/5H, d,  $J = 7.5$  Hz, NH), 5.10 (1/5H, d,  $J_{1,2} = 2.1$  Hz, H-1), 4.75 (4/5H, d,  $J_{1,2} = 7.7$  Hz, H-1), 4.59-4.50 (1H, m, H- $\alpha$ ), 4.09 (1/5H, q,  $J_{5,6} = 6.9$  Hz, H-5), 4.00 (4/5H, q,  $J_{5,6} = 6.9$  Hz, H-5), 3.76 (3/5H, s, CO<sub>2</sub>Me), 3.75 (12/5H, s, CO<sub>2</sub>Me), 3.65-3.59 (1H, m, H-1'), 3.39-3.33 (1/5H, m, H-2), 3.39-3.27 (4/5H, dd,  $J_{\beta a, \beta b} = 13.8$  Hz,  $J_{\alpha, \beta a} = 4.3$  Hz, H- $\beta a$ ), 3.26-3.18 (4/5H, m, H-2), 3.07 (2/5H, d,  $J_{\alpha, \beta} = 5.1$  Hz, H- $\beta$ ), 2.95 (4/5H, dd,  $J_{\beta a, \beta b} = 13.8$  Hz,  $J_{\alpha, \beta b} = 6.3$  Hz, H- $\beta b$ ), 2.88 (4/5H, dd,  $J_{3a, 3b} = 16.6$  Hz,  $J_{2, 3a} = 6.3$  Hz, H-3a), 2.75 (2/5H, d,  $J_{2, 3} = 7.8$  Hz, H-3), 2.29 (4/5H, dd,  $J_{3a, 3b} = 16.6$  Hz,  $J_{2, 3b} = 11.5$  Hz, H-3b), 1.68-1.51 (4H, m, H-2'), 1.45 (9H, s, Boc), 1.33 (3/5H, d,  $J_{5, 6} = 6.9$  Hz, H-6), 1.31 (12/5H, d,  $J_{5, 6} = 6.9$  Hz, H-6), 0.95 & 0.91 (each 12/5H, t,  $J_{2', 3'} = 7.4$  Hz, H-3'), 0.95-0.85 (6/5H, m, H-3'); <sup>13</sup>C-NMR (125 MHz, CDCl<sub>3</sub>), major isomer;  $\delta$  205.3, 171.4, 155.1, 103.4, 80.9, 80.2, 76.3, 53.0, 52.5, 45.1, 42.0, 34.7, 28.3, 26.7, 25.4, 15.4, 9.5, 9.3; HRMS (ESI-TOF)  $m/z$  456.2034 (456.2032 calcd. for C<sub>20</sub>H<sub>35</sub>NO<sub>7</sub>NaS, [M+Na]<sup>+</sup>).

## Compound 22

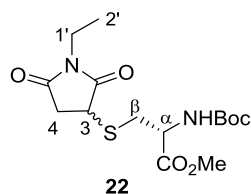

To a solution of **17** (24.5 mg, 104  $\mu$ mol) in DMF (2.12 mL)/phosphate buffer (0.1 M, pH 7.4, 7.28 mL) was added **14** in DMF (1.00 mL, 104  $\mu$ mol) at 37 °C. After being stirred at 37 °C for 1 min, the reaction mixture was quenched with 2-iodoacetamide (96.2 mg, 520  $\mu$ mol). The resulting mixture was stirred at 37 °C for 10 min, and then poured into sat. Na<sub>2</sub>S<sub>2</sub>O<sub>3</sub> aq. (25 mL). The resulting mixture was extracted with EtOAc (25 mL  $\times$  3). The extracts were washed with brine, dried over Na<sub>2</sub>SO<sub>4</sub>, filtered, and concentrated in *vacuo*. Purification of the residue by silica-gel column chromatography (1/1 *n*-hexane/EtOAc) gave **22** as a mixture of inseparable diastereomers (35.6 mg, 98.8  $\mu$ mol, 95% yield, 7/5 dr). White solid;  $R_f$  0.49 (1/1 *n*-hexane/EtOAc); <sup>1</sup>H-NMR (500 MHz, CDCl<sub>3</sub>, TMS)  $\delta$  5.56 (5/12H, d,  $J = 7.8$  Hz, NH), 5.35 (7/12H, d,  $J = 7.8$  Hz, NH), 4.64 (1H, m, H- $\alpha$ ), 3.91 (7/12H, m, H-3), 3.82 (5/12H, m, H-3), 3.79 (3H, s, CO<sub>2</sub>Me), 3.57 (2H, q,  $J_{1', 2'} = 7.2$  Hz, H-1'), 3.57 (7/12H, m, H- $\beta a$ ), 3.42 (5/12H, dd,  $J_{\beta a, \beta b} = 14.1$  Hz,  $J_{\alpha, \beta a} = 5.4$  Hz, H- $\beta a$ ), 3.17 (5/12H, dd,  $J_{\beta a, \beta b} = 13.8$  Hz,  $J_{\alpha, \beta b} = 5.1$  Hz, H- $\beta b$ ), 3.11 (7/12H, dd,  $J_{4a, 4b} = 18.9$  Hz,  $J_{3, 4a} = 9.3$  Hz, H-4a), 3.10 (5/12H, dd,  $J_{4a, 4b} = 18.9$  Hz,  $J_{3, 4a} = 9.0$  Hz, H-4a), 2.98 (7/12H, dd,  $J_{\beta a, \beta b} = 13.8$  Hz,  $J_{\alpha, \beta a} = 7.8$  Hz, H- $\beta b$ ), 2.46 (5/12H, dd,  $J_{4a, 4b} = 18.9$  Hz,  $J_{3, 4b} = 3.9$  Hz, H-4b), 2.43 (7/12H, dd,  $J_{4a, 4b} = 18.9$  Hz,  $J_{3, 4b} = 3.9$  Hz, H-4b), 1.46 (9H,

s, Boc), 1.18 (3H, t,  $J_{1,2'} = 7.2$  Hz, H-2');  $^{13}\text{C}$ -NMR (125 MHz,  $\text{CDCl}_3$ );  $\delta$  176.4, 176.2, 174.2, 174.1, 171.3, 155.3, 155.1, 80.3, 53.5, 52.8, 52.7, 52.5, 39.1, 38.4, 36.0, 35.6, 34.5, 34.1, 34.0, 28.2, 12.8; HRMS (ESI-TOF)  $m/z$  383.1250 (383.1253 calcd. for  $\text{C}_{15}\text{H}_{24}\text{N}_2\text{O}_6\text{NaS}$ ,  $[\text{M}+\text{Na}]^+$ ).

### Compound 23

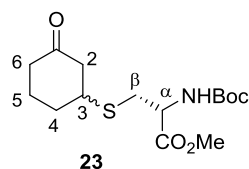

To a solution of **17** (24.5 mg, 104  $\mu\text{mol}$ ) in DMF (2.12 mL)/phosphate buffer (0.1 M, pH 7.4, 7.28 mL) was added **15** in DMF (1.00 mL, 104  $\mu\text{mol}$ ) at 37  $^\circ\text{C}$ . After being stirred at 37  $^\circ\text{C}$  for 1 min, the reaction mixture was quenched with 2-iodoacetamide (96.2 mg, 520  $\mu\text{mol}$ ). The resulting mixture was stirred at 37  $^\circ\text{C}$  for 10 min, and then poured into sat.  $\text{Na}_2\text{S}_2\text{O}_3$  aq. (25 mL). The resulting mixture was extracted with EtOAc (25 mL  $\times$  3). The extracts were washed with brine, dried over  $\text{Na}_2\text{SO}_4$ , filtered, and concentrated in *vacuo*. Purification of the residue by silica-gel column chromatography (3/2 *n*-hexane/EtOAc) gave **23** as a mixture of inseparable diastereomers (15.5 mg, 46.8  $\mu\text{mol}$ , 45% yield, 1/1 dr). White solid;  $R_f$  0.47 (3/2 *n*-hexane/EtOAc);  $^1\text{H}$ -NMR (500 MHz,  $\text{CDCl}_3$ , TMS)  $\delta$  5.39-5.28 (1H, m, NH), 4.60-4.51 (1H, m, H- $\alpha$ ), 3.77 (3H, s,  $\text{CO}_2\text{Me}$ ), 3.15-3.06 (1H, m, H-3), 3.06-2.94 (2H, m, H- $\beta$ ), 2.73-2.66 (1H, m, H-2a), 2.38-2.26 (3H, m, H-2b & H-6), 2.17-2.08 (2H, m, H-5), 1.75-1.67 (2H, m, H-4), 1.26 (9H, s, Boc);  $^{13}\text{C}$ -NMR (125 MHz,  $\text{CDCl}_3$ );  $\delta$  208.2, 171.2, 155.0, 80.2, 53.3, 53.2, 52.6 $\times$ 2, 47.8, 43.1 $\times$ 2, 40.8 $\times$ 2, 32.8, 32.6, 31.4 $\times$ 2, 28.2, 23.9; HRMS (ESI-TOF)  $m/z$  354.1357 (354.1351 calcd. for  $\text{C}_{15}\text{H}_{25}\text{NO}_5\text{NaS}$ ,  $[\text{M}+\text{Na}]^+$ ).

### Scheme S3. Michael reactions of **12** and **14** with **18** or **19**.

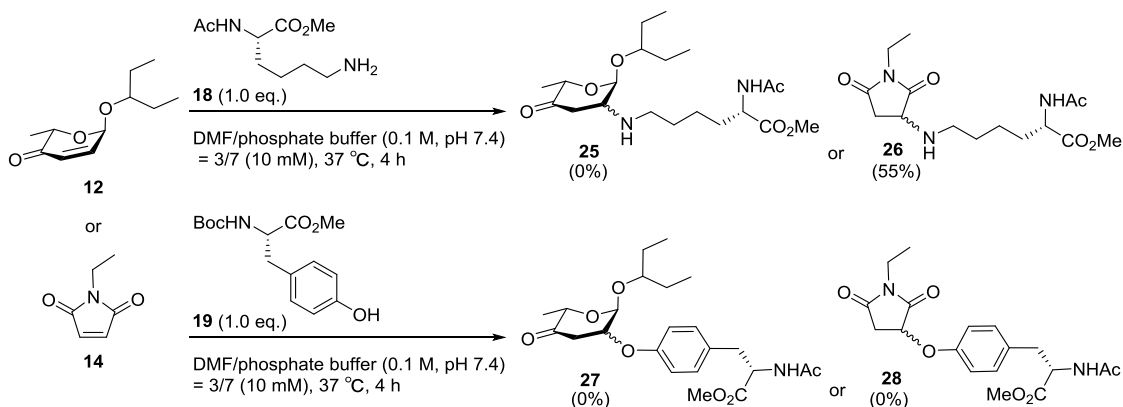

## Compound 26

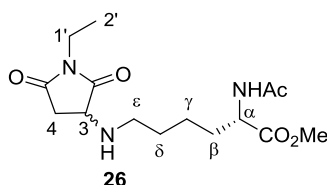

To a solution of **18** (24.5 mg, 104  $\mu\text{mol}$ ) in DMF (2.12 mL)/phosphate buffer (0.1 M, pH 7.4, 7.28 mL) was added **14** in DMF (1.00 mL, 104  $\mu\text{mol}$ ) at 37  $^{\circ}\text{C}$ . After being stirred at 37  $^{\circ}\text{C}$  for 4 h, the reaction mixture was quenched with  $\text{H}_2\text{O}$  (25 mL). The resulting mixture was extracted with EtOAc (25 mL  $\times$  3). The extracts were washed with brine, dried over  $\text{Na}_2\text{SO}_4$ , filtered, and concentrated in *vacuo*. Purification of the residue by silica-gel column chromatography (6/1  $\text{CH}_3\text{Cl}/\text{MeOH}$ ) gave **26** as a mixture of inseparable diastereomers (18.7 mg, 57.2  $\mu\text{mol}$ , 55% yield, 1/1 dr). Colorless syrup;  $R_f$  0.47 (6/1  $\text{CH}_3\text{Cl}/\text{MeOH}$ );  $^1\text{H-NMR}$  (500 MHz,  $\text{CDCl}_3$ , TMS)  $\delta$  6.09 (1H, d,  $J = 6.6$  Hz, NH), 4.62 (1H, m, H- $\alpha$ ), 3.75 (3H, s,  $\text{CO}_2\text{Me}$ ), 3.75-3.72 (1H, m, H-3), 3.56 (2H, q,  $J_{1',2'} = 7.2$  Hz, H-1'), 2.94-2.88 (1H, dd,  $J_{4a,4b} = 17.8$  Hz,  $J_{3,4a} = 8.0$  Hz, H-4a), 2.73-2.55 (2H, m, H- $\epsilon$ ), 2.53-2.46 (1H, dd,  $J_{4a,4b} = 17.8$  Hz,  $J_{3,4b} = 3.8$  Hz, H-4b), 2.03 (3H, s, Ac), 1.90-1.64 (2H, m, H- $\beta$ ), 1.57-1.48 (2H, m, H- $\delta$ ), 1.44-1.32 (2H, m, H- $\gamma$ ), 1.17 (3H, t,  $J_{1',2'} = 7.2$  Hz, H-2');  $^{13}\text{C-NMR}$  (125 MHz,  $\text{CDCl}_3$ );  $\delta$  177.7, 175.1, 173.0, 169.8, 56.3 $\times$ 2, 52.4 2, 51.9, 47.3, 47.2, 36.2 $\times$ 2, 33.8, 32.3 $\times$ 2, 29.4 $\times$ 2, 23.2, 22.7 $\times$ 2, 12.9; HRMS (ESI-TOF)  $m/z$  328.1861 (328.1872 calcd. for  $\text{C}_{15}\text{H}_{26}\text{N}_3\text{O}_5$ ,  $[\text{M}+\text{H}]^+$ ).

## Synthesis of coumarin- $\alpha$ -aculoside hybrid 29.

### Compound 31

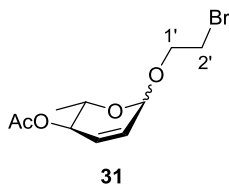

To a solution of **30** (1.50 g, 7.00 mmol) and 2-bromoethanol (1.00 mL, 14.0 mmol) in dry  $\text{CH}_2\text{Cl}_2$  (60.0 mL) was added ( $\pm$ )-10-CSA (325 mg, 1.40 mmol) at 0  $^{\circ}\text{C}$ . After being stirred at room temperature for 2.5 h, the reaction mixture was quenched with sat.  $\text{NaHCO}_3$  aq. (60 mL). The resulting mixture was extracted with  $\text{CHCl}_3$  (60 mL  $\times$  3). The extracts were washed with brine, dried over  $\text{Na}_2\text{SO}_4$ , filtered, and concentrated in *vacuo*. Purification of the residue by



silica-gel column chromatography (10/1 toluene/EtOAc) gave **31** as a mixture of inseparable diastereomers (1.11 g, 3.85 mmol, 57% yield,  $\alpha/\beta = 8/1$ ). Pale brown syrup;  $R_f$  0.49 (10/1 toluene/EtOAc);  $^1\text{H-NMR}$  (500 MHz,  $\text{CDCl}_3$ , TMS)  $\delta$  5.97-5.80 (2H, m, H-2 & H-3), 5.07 (8/9H, m, H-4), 5.03-5.01 (8/9H, m, H-1), 5.07-5.01 (2/9H, m, H-1 & H-4), 4.10-4.00 (8/9H, m, H-5), 4.10-3.83 (2H, m, H-1'), 3.90-3.83 (1/9H, m, H-5), 3.52 (2H, m, H-2'), 2.09 (3H, s, Ac), 1.32 (1/3H, d,  $J_{5,6} = 6.3$  Hz, H-6), 1.23 (24/9H, d,  $J_{5,6} = 6.3$  Hz, H-6);  $^{13}\text{C-NMR}$  (125 MHz,  $\text{CDCl}_3$ ),  $\alpha$  isomer;  $\delta$  170.5, 130.1, 127.2, 94.7, 70.6, 68.5, 65.1, 30.8, 21.0, 17.9; HRMS (ESI-TOF)  $m/z$  301.0052 (301.0051 calcd. for  $\text{C}_{10}\text{H}_{15}\text{O}_4\text{NaBr}$ ,  $[\text{M}+\text{Na}]^+$ ).

### Compound 32

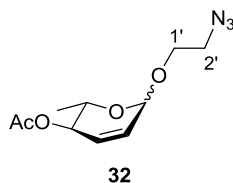

To a solution of **31** (1.36 g, 4.87 mmol) in dry DMF (33.0 mL) was added  $\text{NaN}_3$  (1.58 g, 24.4 mmol) at room temperature. After being stirred at room temperature for 24 h, the reaction mixture was quenched with  $\text{H}_2\text{O}$  (30 mL). The resulting mixture was extracted with EtOAc (30 mL  $\times$  3). The extracts were washed with brine, dried over  $\text{Na}_2\text{SO}_4$ , filtered, and concentrated in *vacuo*. Purification of the residue by silica-gel column chromatography (4/1 *n*-hexane/EtOAc) gave **32** as a mixture of inseparable diastereomers (1.06 g, 4.38 mmol, 90% yield,  $\alpha/\beta = 6/1$ ). Colorless syrup;  $R_f$  0.46 (4/1 *n*-hexane/EtOAc);  $^1\text{H-NMR}$  (300 MHz,  $\text{CDCl}_3$ , TMS)  $\delta$  5.98-5.78 (2H, m, H-2 & H-3), 5.10-5.03 (6/7H, m, H-4), 5.02-5.00 (6/7H, m, H-1), 5.10-5.02 (2/7H, m, H-1 & H-4), 4.03-3.90 (6/7H, m, H-5), 4.00-3.85 (1/7H, m, H-5), 4.03-3.65 (2H, m, H-1'), 3.53-3.35 (2H, m, H-2'), 2.10 (18/7H, s, Ac), 2.09 (3/7H, s, Ac), 1.33 (3/7H, d,  $J_{5,6} = 6.6$  Hz, H-6), 1.24 (18/7H, d,  $J_{5,6} = 6.6$  Hz, H-6);  $^{13}\text{C-NMR}$  (125 MHz,  $\text{CDCl}_3$ ),  $\alpha$  isomer;  $\delta$  170.5, 130.0, 127.2, 94.7, 70.7, 67.1, 65.0, 50.8, 21.0, 17.9; HRMS (ESI-TOF)  $m/z$  242.1132 (242.1141 calcd. for  $\text{C}_{10}\text{H}_{16}\text{N}_3\text{O}_4$ ,  $[\text{M}+\text{H}]^+$ ).

### Compound 33

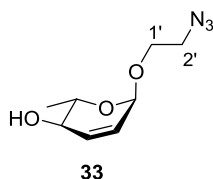

To a solution of **32** (44.0 mg, 182  $\mu\text{mol}$ ) in MeOH (850  $\mu\text{L}$ ) was added 0.2 M NaOMe in MeOH (910  $\mu\text{L}$ , 182  $\mu\text{mol}$ ) at room temperature. After being stirred at room temperature for 2.5 h, the reaction mixture was quenched with Amberlite<sup>®</sup> IR 120 H<sup>+</sup> form. The resulting suspension was filtered, and then the filtrate was concentrated in *vacuo*. Purification of the residue by silica-gel column chromatography (1/1 *n*-hexane/EtOAc) gave **33** (26.9 mg, 135  $\mu\text{mol}$ , 74% yield). Colorless syrup;  $R_f$  0.53 (1/1 *n*-hexane/EtOAc);  $[\alpha]_D^{27} -14.5^\circ$  ( $c$  1.0,  $\text{CHCl}_3$ );  $^1\text{H-NMR}$  (500 MHz,  $\text{CDCl}_3$ , TMS)  $\delta$  5.98-5.93 (1H, m, H-2), 5.80-5.76 (1H, m, H-3), 5.00-4.97 (1H, m, H-1), 3.90-3.82 (1H, m, H-4), 3.77-3.70 (1H, dq,  $J_{4,5} = 8.6$  Hz,  $J_{5,6} = 6.3$  Hz, H-5), 3.98-3.65 (2H, m, H-1'), 3.49-3.37 (2H, m, H-2'), 1.45 (1H, d,  $J = 8.3$  Hz, OH), 1.34 (3H, d,  $J_{5,6} = 6.3$  Hz, H-6);  $^{13}\text{C-NMR}$  (125 MHz,  $\text{CDCl}_3$ );  $\delta$  133.7, 126.1, 94.6, 69.5, 68.1, 67.0, 50.8, 17.9; HRMS (ESI-TOF)  $m/z$  200.1038 (200.1035 calcd. for  $\text{C}_8\text{H}_{14}\text{N}_3\text{O}_3$ ,  $[\text{M}+\text{H}]^+$ ).

### Compound 34

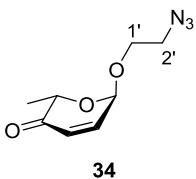

To a solution of **33** (48.0 mg, 241  $\mu\text{mol}$ ) in dry  $\text{CH}_2\text{Cl}_2$  (1.44 mL) was added  $\text{MnO}_2$  (628 mg, 7.23 mmol) at room temperature. After being stirred at room temperature for 19 h, the mixture was filtered through a pad of Celite. The filtrate was concentrated in *vacuo*. Purification of the residue by silica-gel column chromatography (2/1 *n*-hexane/EtOAc) gave **34** (26.2 mg, 133  $\mu\text{mol}$ , 55% yield). Colorless syrup;  $R_f$  0.61 (2/1 *n*-hexane/EtOAc);  $[\alpha]_D^{23} +14.5^\circ$  ( $c$  1.0,  $\text{CHCl}_3$ );  $^1\text{H-NMR}$  (300 MHz,  $\text{CDCl}_3$ , TMS)  $\delta$  6.85 (1H, dd,  $J_{2,3} = 10.2$  Hz,  $J_{1,2} = 3.6$  Hz, H-2), 6.11 (1H, d,  $J_{2,3} = 10.2$  Hz, H-3), 5.24 (1H, d,  $J_{1,2} = 3.6$  Hz, H-1), 4.59 (1H, q,  $J_{5,6} = 6.6$  Hz, H-5), 4.18-3.72 (2H, m, H-1'), 3.58-3.40 (2H, m, H-2'), 1.41 (3H, d,  $J_{5,6} = 6.6$  Hz, H-6);  $^{13}\text{C-NMR}$  (125 MHz,  $\text{CDCl}_3$ );  $\delta$  196.6, 142.7, 127.5, 93.4, 70.5, 67.9, 50.7, 15.2; HRMS (ESI-TOF)  $m/z$

198.0889 (198.0879 calcd. for C<sub>8</sub>H<sub>12</sub>N<sub>3</sub>O<sub>3</sub>, [M+H]<sup>+</sup>).

## Compound 29

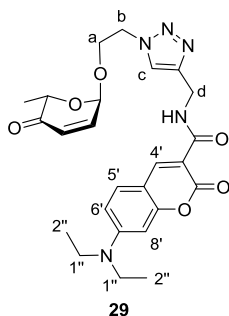

To a solution of **34** (9.0 mg, 45.6  $\mu\text{mol}$ ) and **35** (11.3 mg, 38.0  $\mu\text{mol}$ ) in *t*-BuOH/H<sub>2</sub>O/DMF (5/4/3, 1.36 mL) were added sodium ascorbate (15.9 mg, 7.98  $\mu\text{mol}$ ), CuSO<sub>4</sub>·5H<sub>2</sub>O (1.98 mg, 7.98  $\mu\text{mol}$ ) and triazole ligand (1.97 mg, 3.80  $\mu\text{mol}$ ) at room temperature. After being stirred at room temperature for 6 h, the reaction mixture was quenched with H<sub>2</sub>O (5 mL). The resulting mixture was extracted with CHCl<sub>3</sub> (10 mL  $\times$  3). The extracts were washed with brine, dried over Na<sub>2</sub>SO<sub>4</sub>, filtered, and concentrated in *vacuo*. Purification of the residue by silica-gel column chromatography (9/1 CHCl<sub>3</sub>/MeOH) gave **29** (10.3 mg, 20.9  $\mu\text{mol}$ , 55% yield). Yellow solid; *R<sub>f</sub>* 0.60 (9/1 CHCl<sub>3</sub>/MeOH);  $[\alpha]_{\text{D}}^{27} +58.1^\circ$  (*c* 0.25, CHCl<sub>3</sub>); mp 148.0-149.0  $^\circ\text{C}$ ; <sup>1</sup>H-NMR (300 MHz, CDCl<sub>3</sub>, TMS)  $\delta$  9.23 (1H, m, NH), 8.68 (1H, s, H-8'), 7.67 (1H, s, H-c), 7.43 (1H, d, *J*<sub>5',6'</sub> = 9.0 Hz, H-6'), 6.76 (1H, dd, *J*<sub>2,3</sub> = 10.2 Hz, *J*<sub>1,2</sub> = 3.3, H-2), 6.65 (1H, dd, *J*<sub>5',6'</sub> = 9.0 Hz, *J*<sub>4',5'</sub> = 2.4, H-5'), 6.50 (1H, d, *J*<sub>4',5'</sub> = 2.4 Hz, H-4'), 6.05 (1H, d, *J*<sub>2,3</sub> = 10.2 Hz, H-3), 5.11 (1H, d, *J*<sub>1,2</sub> = 3.3 Hz, H-1), 4.72 (2H, d, *J* = 5.7 Hz, H-d), 4.65-4.49 (2H, m, H-b), 4.35 (1H, q, *J*<sub>5,6</sub> = 6.9 Hz, H-5), 4.28-3.93 (2H, m, H-a), 3.46 (4H, q, *J*<sub>1'',2''</sub> = 7.2 Hz, H-1''), 1.33 (3H, d, *J*<sub>5,6</sub> = 6.9 Hz, H-6), 1.24 (6H, t, *J*<sub>1'',2''</sub> = 7.2 Hz, H-2''); <sup>13</sup>C-NMR (125 MHz, CDCl<sub>3</sub>);  $\delta$  196.4, 163.4, 162.6, 157.7, 152.7, 148.2, 145.4, 142.5, 131.2, 127.6, 123.3, 110.0, 109.8, 108.3, 96.6, 93.4, 70.5, 67.3, 50.1, 45.1, 35.3, 15.2, 12.4; HRMS (ESI-TOF) *m/z* 496.2209 (496.2196 calcd. for C<sub>25</sub>H<sub>30</sub>N<sub>5</sub>O<sub>6</sub>, [M+H]<sup>+</sup>).

## Michael reaction of 29 with 17.

### Compound 36

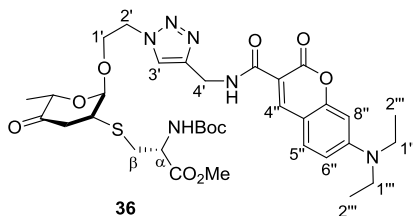

To a solution of **17** (11.4 mg, 23.4  $\mu\text{mol}$ ) in DMF (1.54 mL)/phosphate buffer (0.1 M, pH 7.4, 700  $\mu\text{L}$ ) was added **29** in DMF (100  $\mu\text{L}$ , 23.4  $\mu\text{mol}$ ) at 37  $^{\circ}\text{C}$ . After being stirred at 37  $^{\circ}\text{C}$  for 1 min, the reaction mixture was quenched with 2-iodoacetamide (21.6 mg, 117  $\mu\text{mol}$ ). The resulting mixture was stirred at 37  $^{\circ}\text{C}$  for 10 min, and then poured into sat.  $\text{Na}_2\text{S}_2\text{O}_3$  aq. (5 mL). The resulting mixture was extracted with  $\text{CHCl}_3$  (10 mL  $\times$  3). The extracts were washed with brine, dried over  $\text{Na}_2\text{SO}_4$ , filtered, and concentrated in *vacuo*. Purification of the residue by silica-gel column chromatography (4/3 toluene/acetone) gave **36** as a single diastereomer (11.9 mg, 16.4  $\mu\text{mol}$ , 70% yield). Yellow solid;  $R_f$  0.42 (4/3 toluene/acetone);  $[\alpha]_{\text{D}}^{27} -63.6^{\circ}$  ( $c$  0.58,  $\text{CHCl}_3$ ); mp 59.0-60.5  $^{\circ}\text{C}$ ;  $^1\text{H-NMR}$  (500 MHz,  $\text{CDCl}_3$ , TMS)  $\delta$  9.27-9.23 (1H, m, NH), 8.68H, s, H-8''), 7.77 (1H, s, H-3'), 7.45 (1H, d,  $J_{5'',6''} = 8.9$  Hz, H-6''), 6.65 (1H, dd,  $J_{5'',6''} = 8.9$  Hz,  $J_{4'',5''} = 2.1$  Hz, H-5''), 6.49 (1H, d,  $J_{4'',5''} = 2.1$  Hz, H-4''), 5.71 (1H, d,  $J = 8.6$  Hz, NHBoc), 4.90 (1H, d,  $J_{1,2} = 4.6$  Hz, H-1), 4.72 (2H, d,  $J = 5.8$  Hz, H-4'), 4.64-4.50 (3H, m, H- $\alpha$  & H-2'), 4.22-3.89 (3H, m, H-1' & H-5), 3.75 (3H, s,  $\text{CO}_2\text{Me}$ ), 3.45 (4H, q,  $J_{1''',2'''} = 7.2$  Hz, H-1'''), 3.18-3.10 (1H, m, H-2), 3.06-2.92 (2H, m, H- $\beta$ ), 2.67 (1H, dd,  $J_{3a,3b} = 16.3$  Hz,  $J_{2,3a} = 4.3$  Hz, H-3a), 2.51 (1H, dd,  $J_{3a,3b} = 16.3$  Hz,  $J_{2,3b} = 10.9$  Hz, H-3b), 1.42 (9H, s, Boc), 1.27-1.18 (9H, m, H-2''' & H-6);  $^{13}\text{C-NMR}$  (125 MHz,  $\text{CDCl}_3$ );  $\delta$  207.7, 171.3, 163.4, 162.6, 157.7, 155.3, 152.7, 148.3, 145.4, 131.2, 123.5, 110.0, 108.3, 102.0, 96.6, 80.2, 71.1, 66.2, 53.3, 52.7, 49.9, 45.1, 43.5, 40.4, 35.5, 33.8, 29.7, 28.3, 14.8, 12.4; HRMS (ESI-TOF)  $m/z$  731.3073 (731.3074 calcd. for  $\text{C}_{34}\text{H}_{47}\text{N}_6\text{O}_{10}\text{S}$ ,  $[\text{M}+\text{H}]^+$ ).

### Cell culture.

MCF-7 human breast cancer cells were grown at 37  $^{\circ}\text{C}$  in 5%  $\text{CO}_2$  in air in DMEM medium supplemented with phenol red, L-glutamine (2 mM), penicillin (100 Units/mL), kanamycin (100  $\mu\text{g}/\text{mL}$ ) and 10% Fetal bovine serum (FBS). Sarcoma 180 solid tumor cells were grown at 37  $^{\circ}\text{C}$  in 5%  $\text{CO}_2$  in air in RPMI medium 1640 supplemented with phenol red, L-glutamine (2 mM), penicillin (100 Units/mL), kanamycin (100  $\mu\text{g}/\text{mL}$ ) and 5% FBS.

MCF-7 and Sarcoma 180 were provided by the RIKEN BRC through the National Bio-Resource Project of the MEXT, Japan. FBS was purchased from MP Biomedicals.

### **Cell cytotoxicity assay.**

MCF-7 or Sarcoma 180 cells were seeded at  $5.0 \times 10^3$  cells/well in 96-well in 10% FBS DMEM or 5% FBS RPMI, respectively. After 24 h, samples were incubated with the variable concentrations of compounds. Compounds were diluted with DMSO at 400-fold the desired final test concentrations. Cells were then kept for 24 h at 37 °C and in 5% CO<sub>2</sub> in air, and then MTT or WST reagent was added to each well and cells were incubated for up to 3 additional hours at 37 °C. The absorbance at a single wavelength of 540 or 450 nm was read on a plate reader SAFIRE (TECAN).

### **MALDI-TOF MS analysis.**

To a solution of **29** (150 μM) in phosphate buffer (0.1 M, pH 7.4, 667 μL) containing 8.6% DMF was added BSA (30 μM) in phosphate buffer (0.1 M, pH 7.4, 333 μL) containing 8.6% DMF at 37 °C and the reaction proceeded for 1 hour at 37 °C. The reaction mixture was purified using Amicon<sup>®</sup> Ultra 30K device and the resulting solution was lyophilized. The residue was diluted with H<sub>2</sub>O (5.0 μL), and the resulting solution was mixed with a matrix solution (5.0 μL) of 3,5-dimethoxy 4-hydroxycinnamic acid (in 50:50 MeCN/H<sub>2</sub>O containing 0.1% TFA). Analyses by MALDI TOF MS were performed in the positive ion mode on a Ultra flex (Bruker).

### **Fluorescence microscopic analysis.**

MCF-7 cells were cultured on φ18 mm micro cover glass (Matsunami Glass Industrial, Ltd.) in 6-well plate ( $1.5 \times 10^5$  cells/well) in 10% FBS DMEM. After 24 h, the cells were incubated with the media containing compound **29** or **35** (final concentration of 33 μM) for 30 min at 37 °C and in 5% CO<sub>2</sub> in air. Compounds were diluted with DMSO at 200-fold the desired final test concentration. For the 2-iodoacetamide treated sample, the cells were incubated with the media containing 2-iodoacetamide (final concentration of 10 mM) for 1 h at 37 °C before compound **35** was incubated. Cells were then washed five times with phosphate buffered saline (PBS) and fixed with 4% paraformaldehyde phosphate buffer solution for 30 min at room temperature. After removing paraformaldehyde, cells were washed three times with PBS. The cells were observed by inverted fluorescence microscope (EVOS FL Cell Imaging System; Life

Technologies).

### **References.**

- 1) S. Koepper and J. Thiem, *J. Carbohydr. Chem.*, 1987, **6**, 57.
- 2) (a) K. Sasaki, S. Matsumura and K. Toshima, *Tetrahedron Lett.*, 2007, **48**, 6982. (b) S. Kusumi, S. Tomono, S. Okuzawa, E. Kaneko, T. Ueda, K. Sasaki, D. Takahashi and K. Toshima, *J. Am. Chem. Soc.*, 2013, **135**, 15909.
- 3) M. Bergmann and H. Schotte, *Ber. Dtsch. Chem. Ges.*, 1921, **54**, 440.
- 4) R. F. Luduena and M. C. Roach, *Biochemistry*, 1981, **20**, 4437.

**$^1\text{H}$  and  $^{13}\text{C}$ -NMR spectra.**

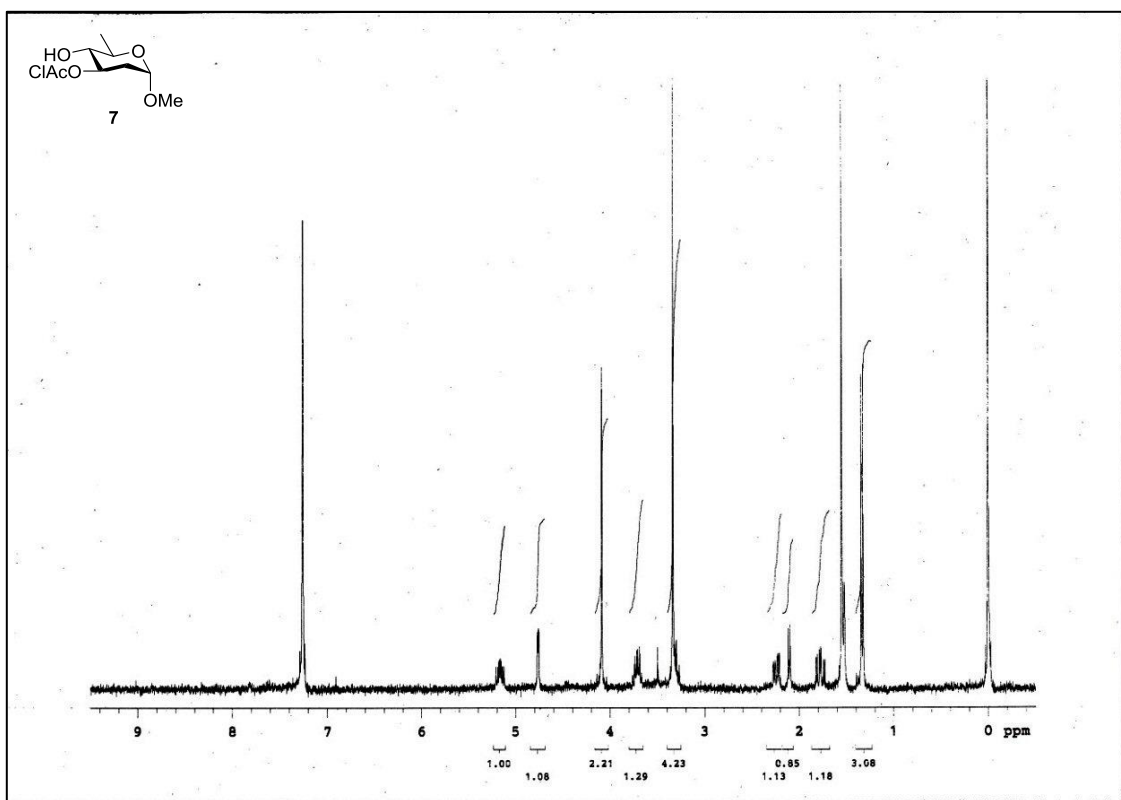

Figure S1 <sup>1</sup>H-NMR spectrum of 7

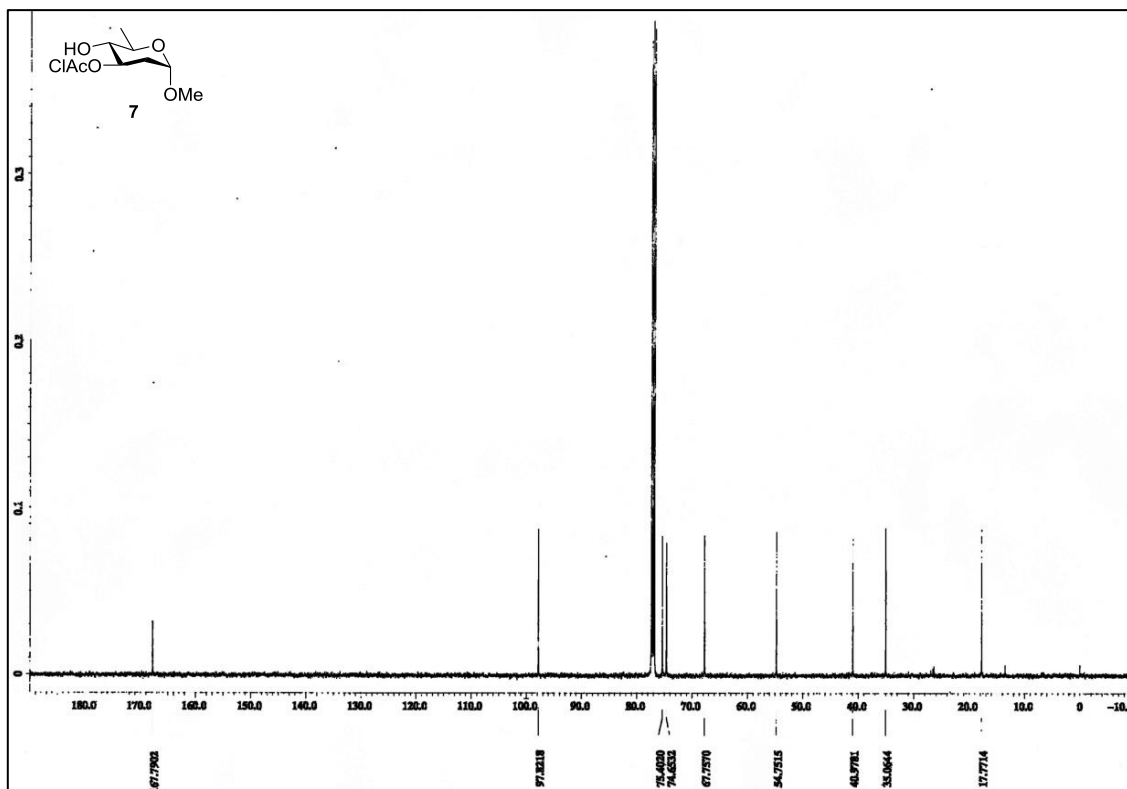

Figure S2 <sup>13</sup>C-NMR spectrum of 7



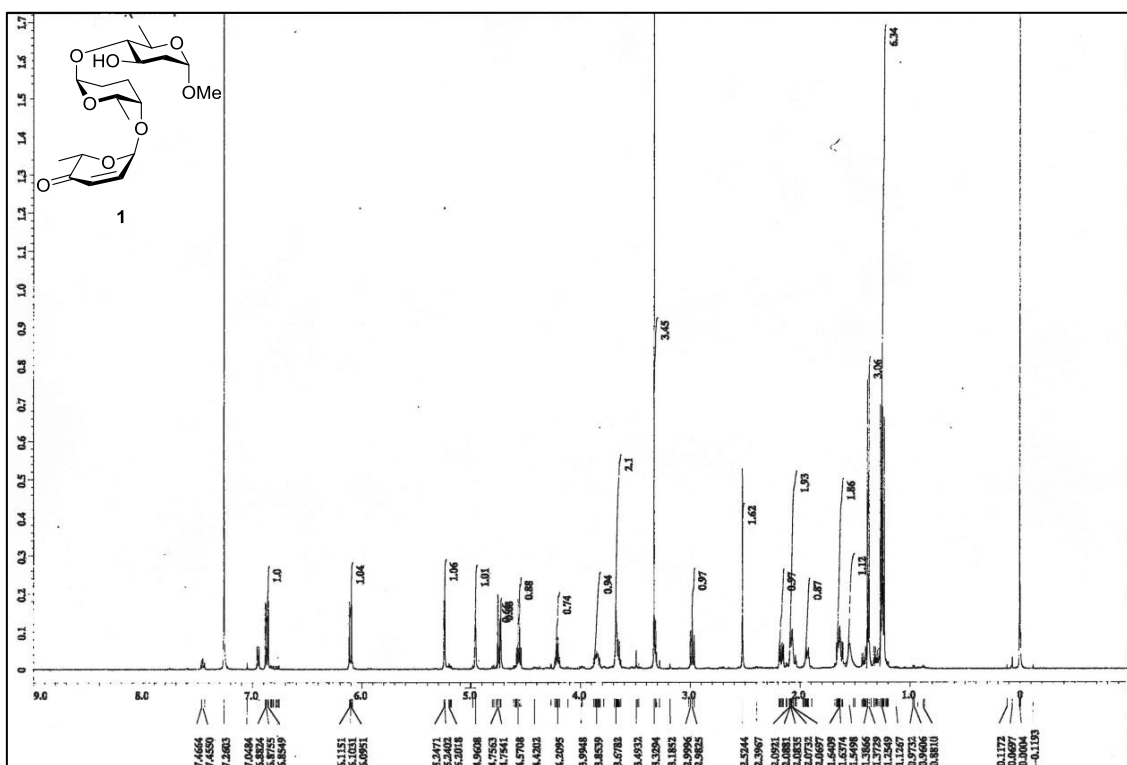

Figure S3 <sup>1</sup>H-NMR spectrum of 1

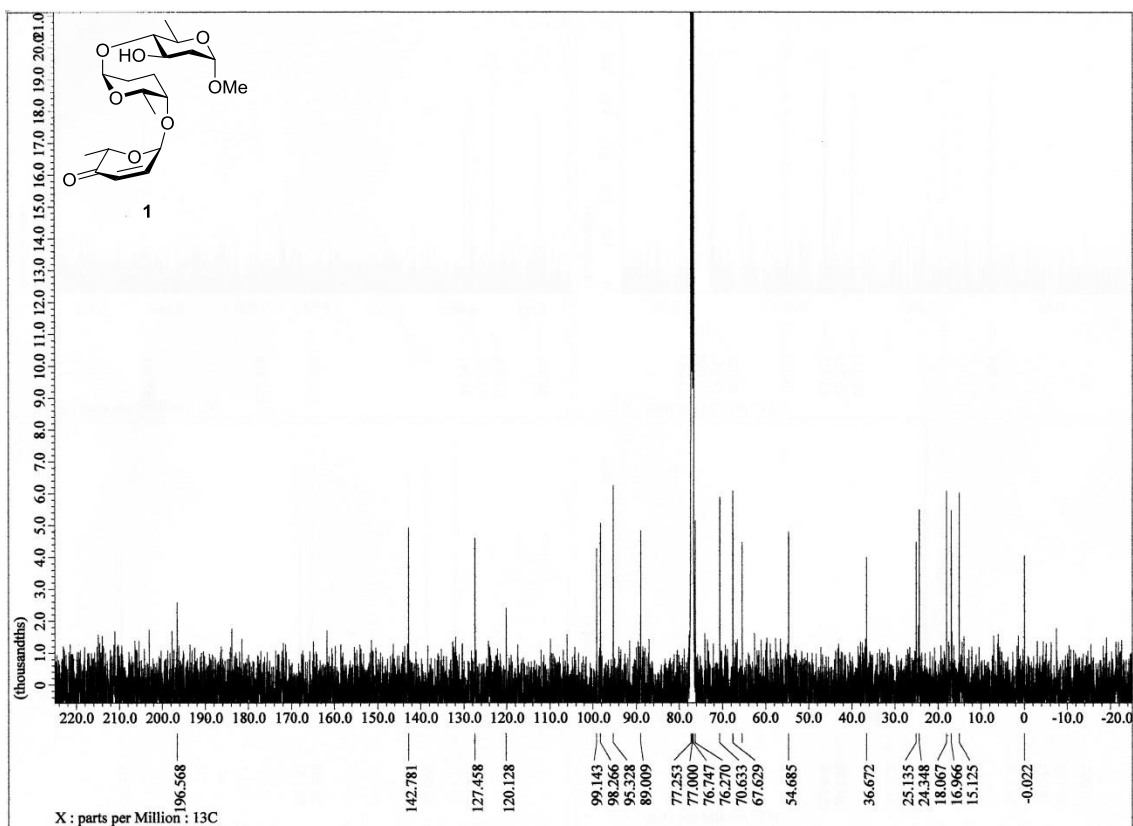

Figure S4 <sup>13</sup>C-NMR spectrum of 1

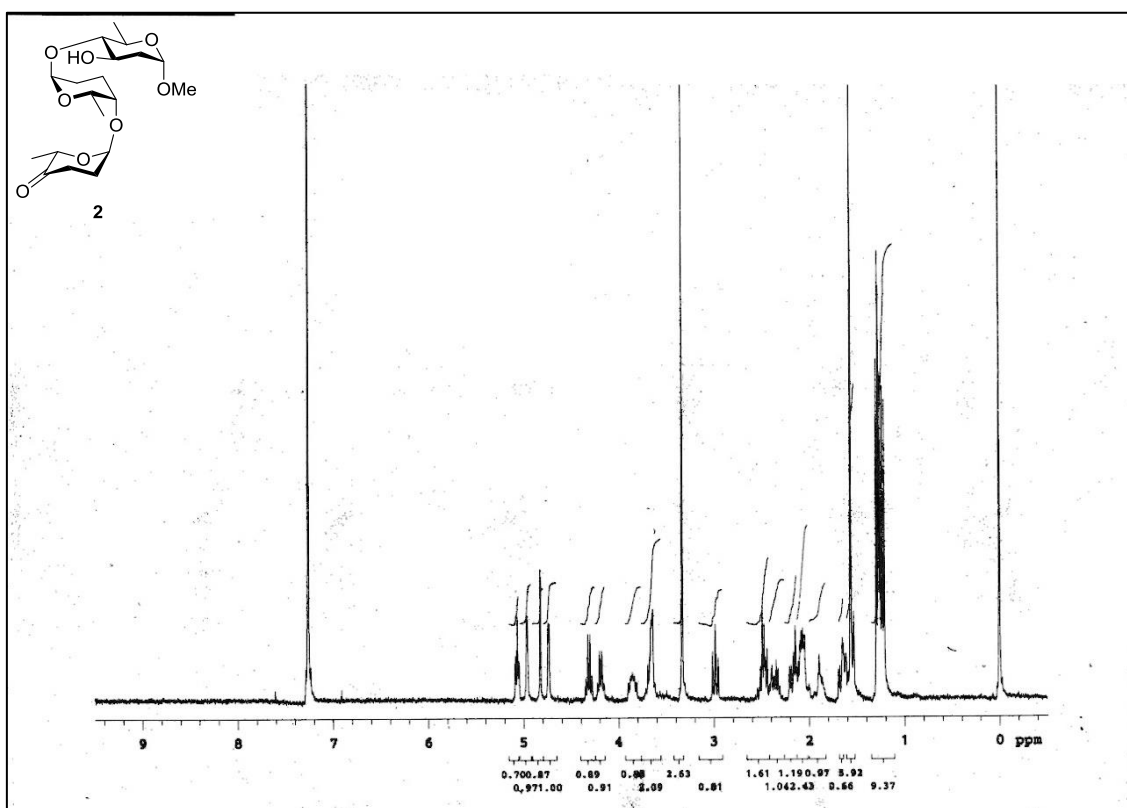

Figure S9 <sup>1</sup>H-NMR spectrum of 2

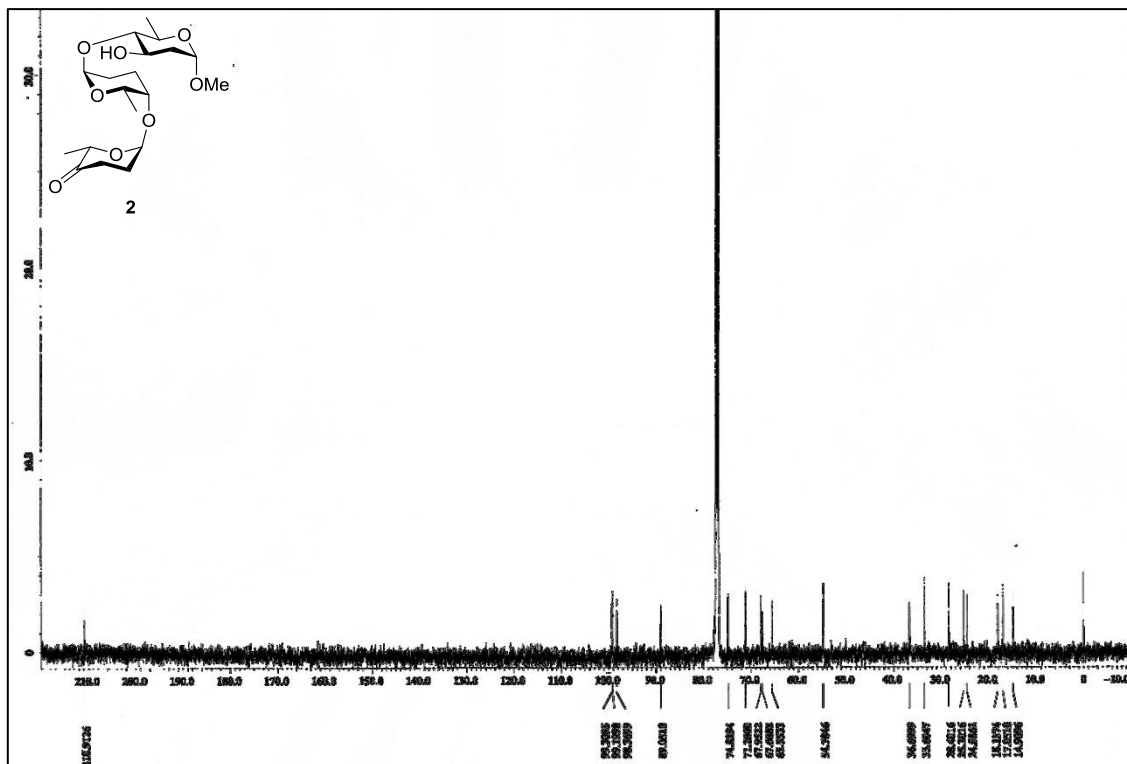

Figure S10 <sup>13</sup>C-NMR spectrum of 2

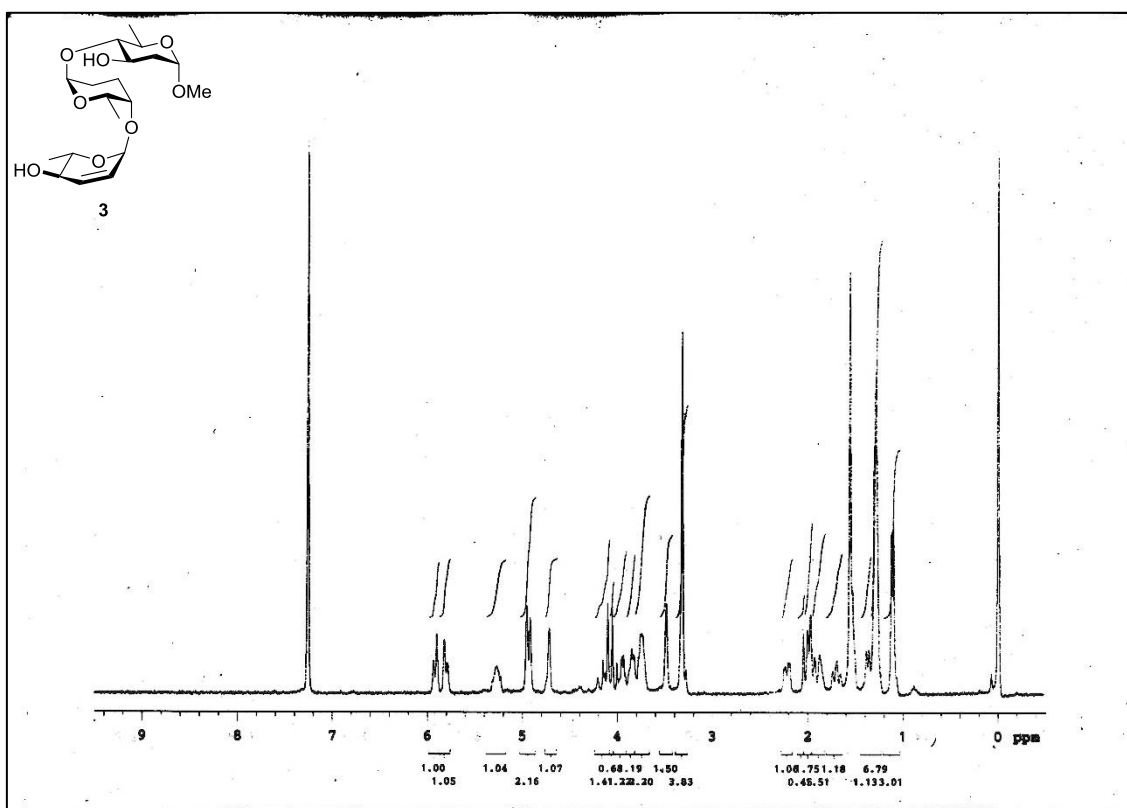

Figure S5 <sup>1</sup>H-NMR spectrum of 3

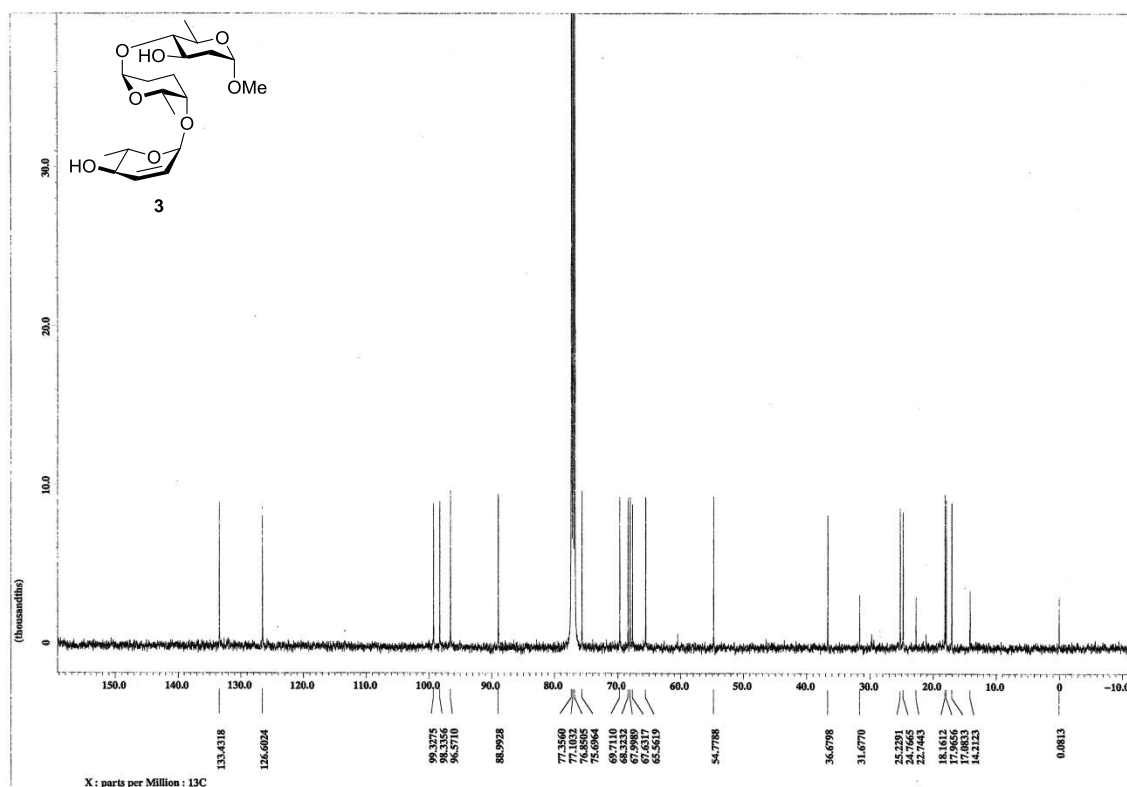

Figure S6 <sup>13</sup>C-NMR spectrum of 3

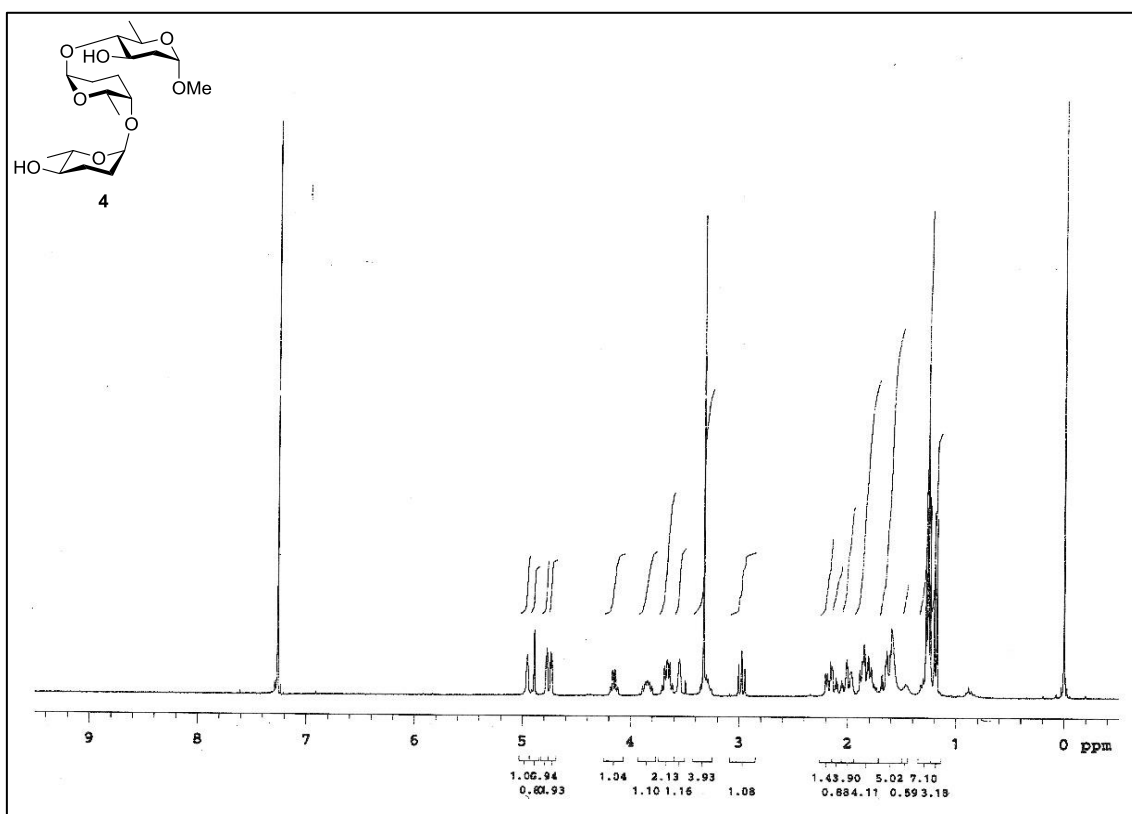

**Figure S7**  $^1\text{H-NMR}$  spectrum of **4**

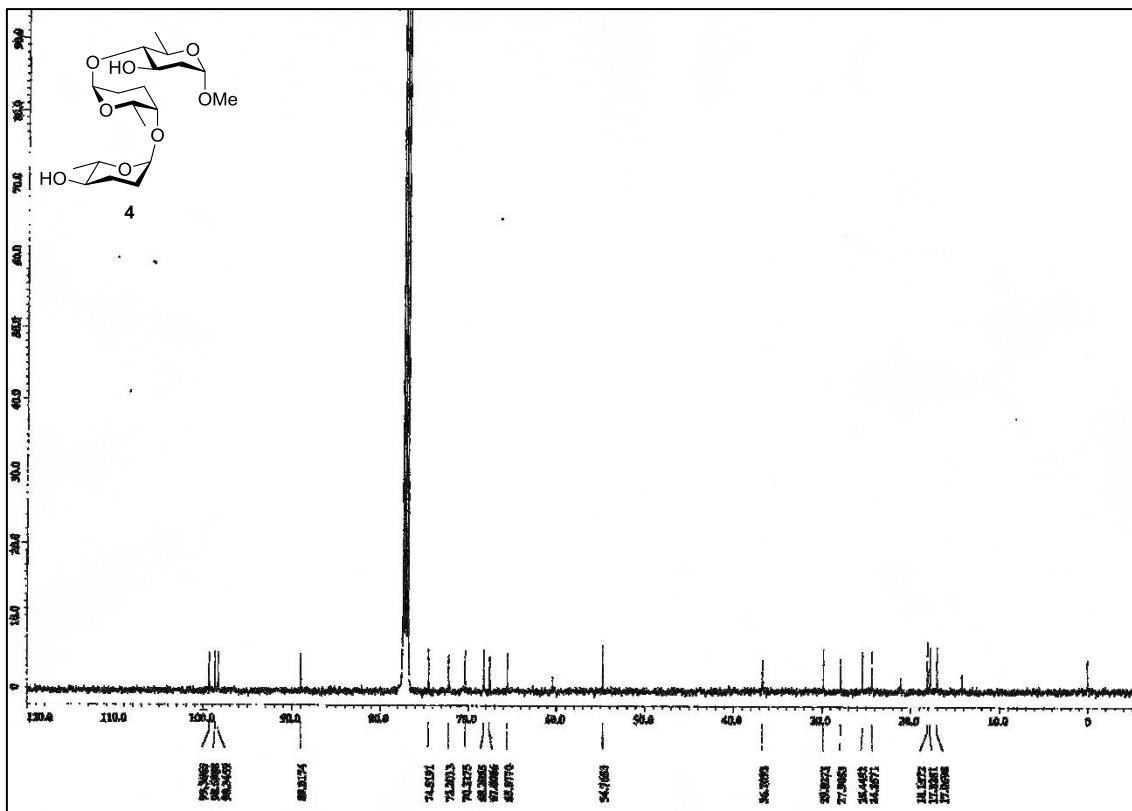

**Figure S8**  $^{13}\text{C-NMR}$  spectrum of **4**

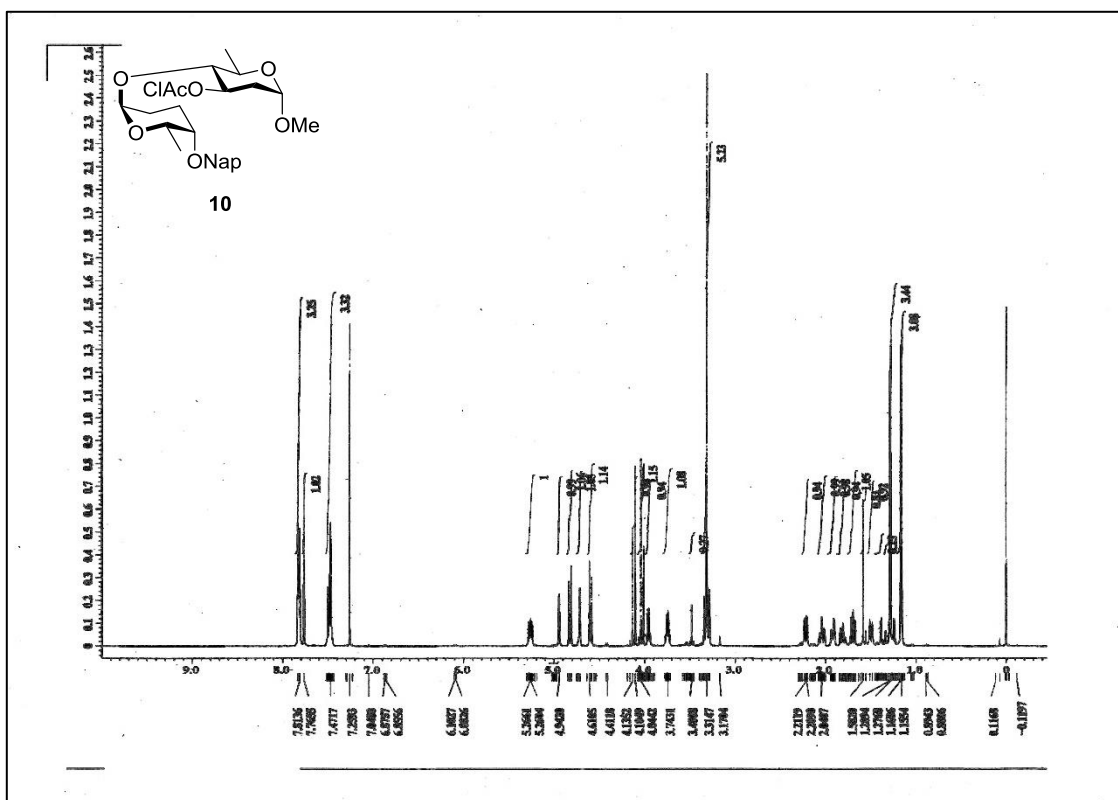

Figure S11 <sup>1</sup>H-NMR spectrum of **10**

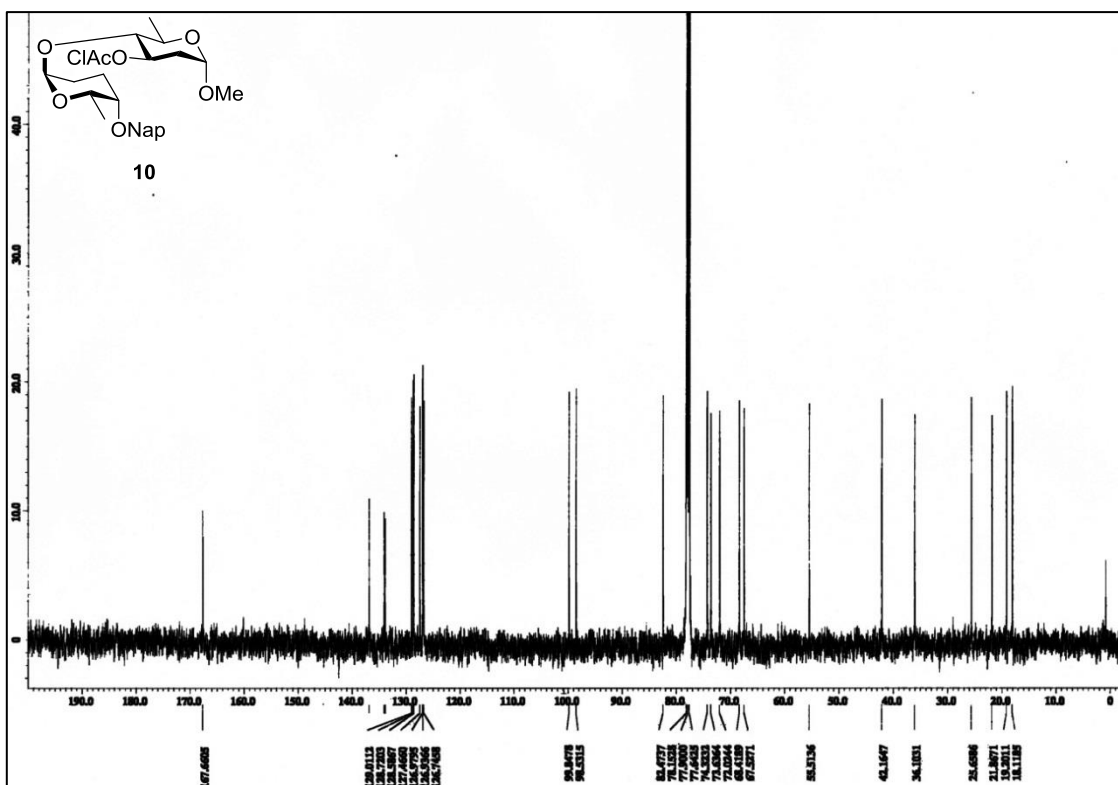

Figure S12 <sup>13</sup>C-NMR spectrum of **10**

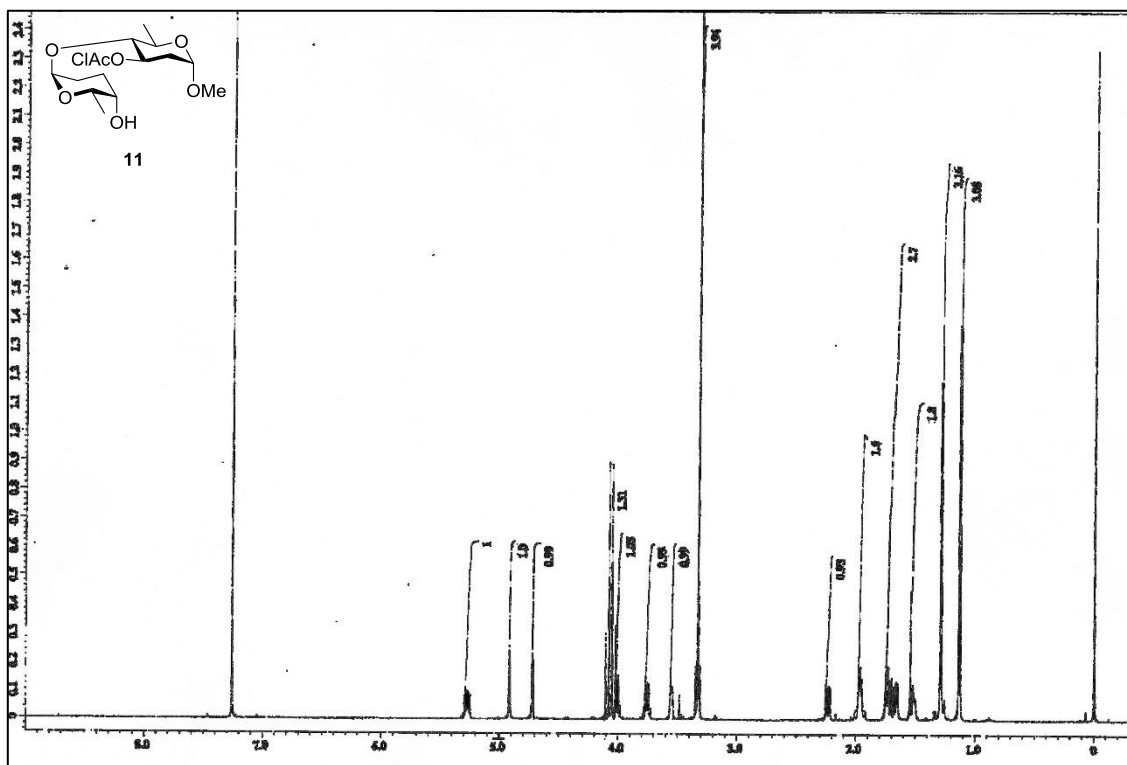

Figure S13  $^1\text{H-NMR}$  spectrum of **11**

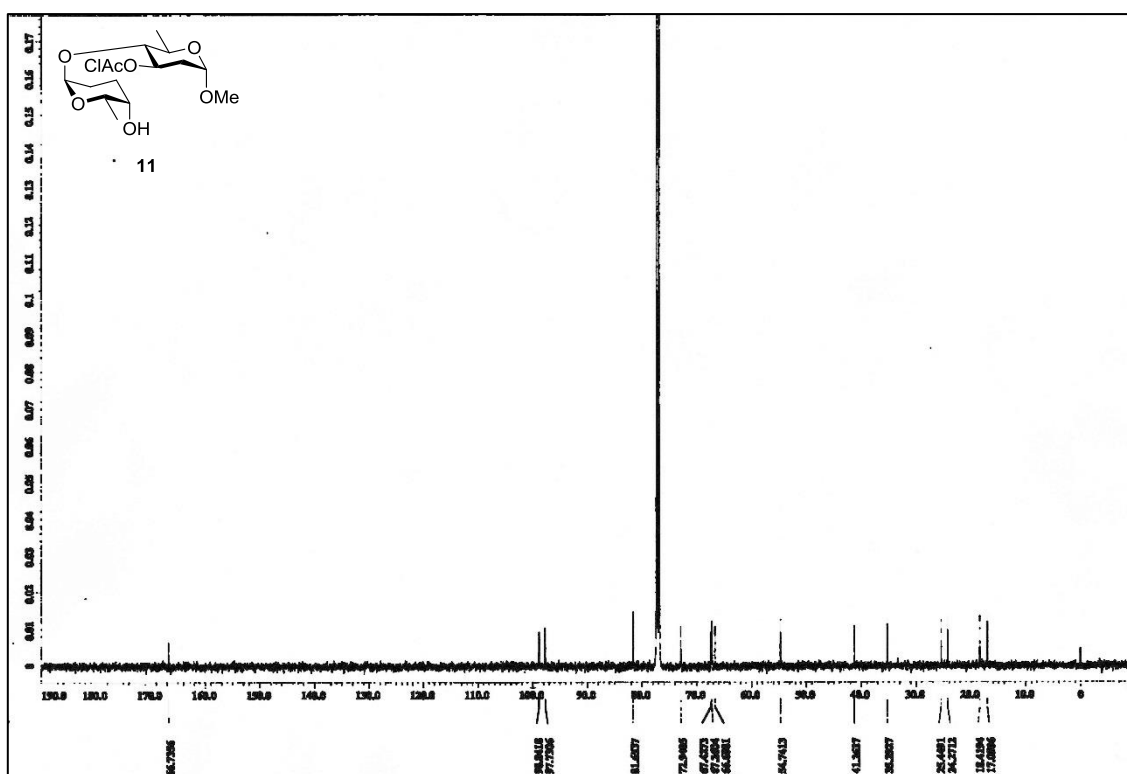

Figure S14  $^{13}\text{C-NMR}$  spectrum of **11**

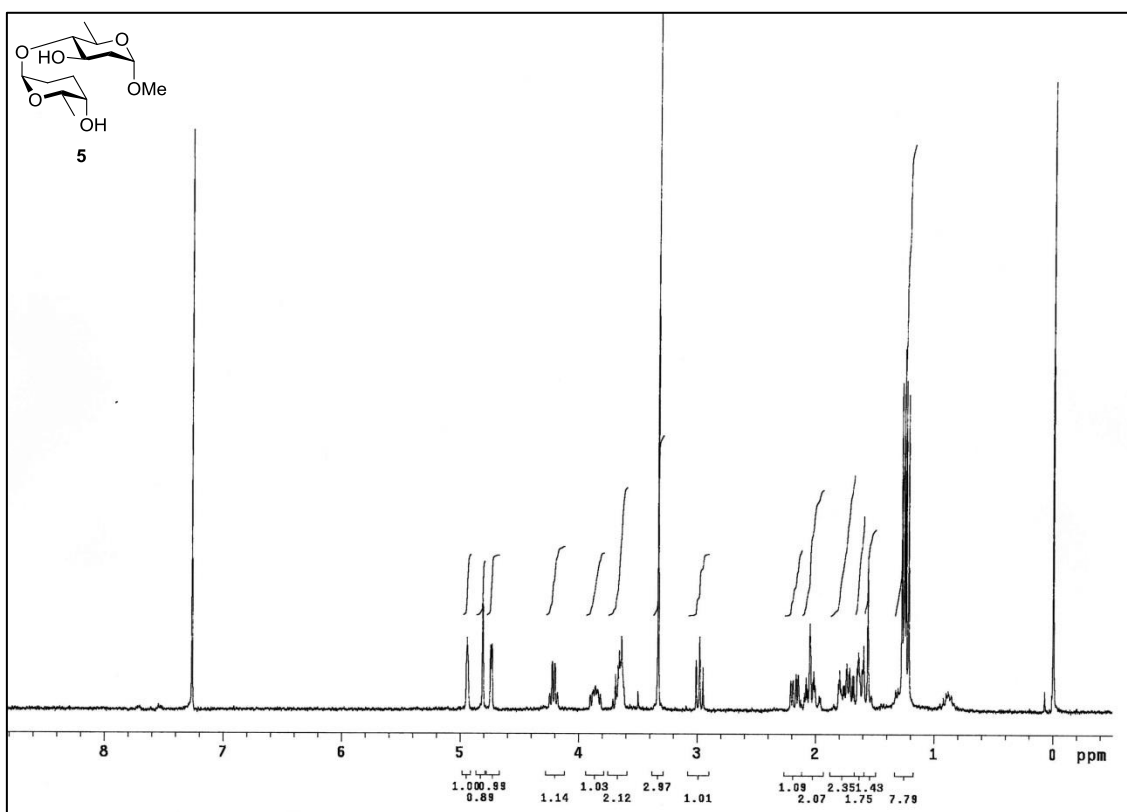

Figure S15 <sup>1</sup>H-NMR spectrum of 5

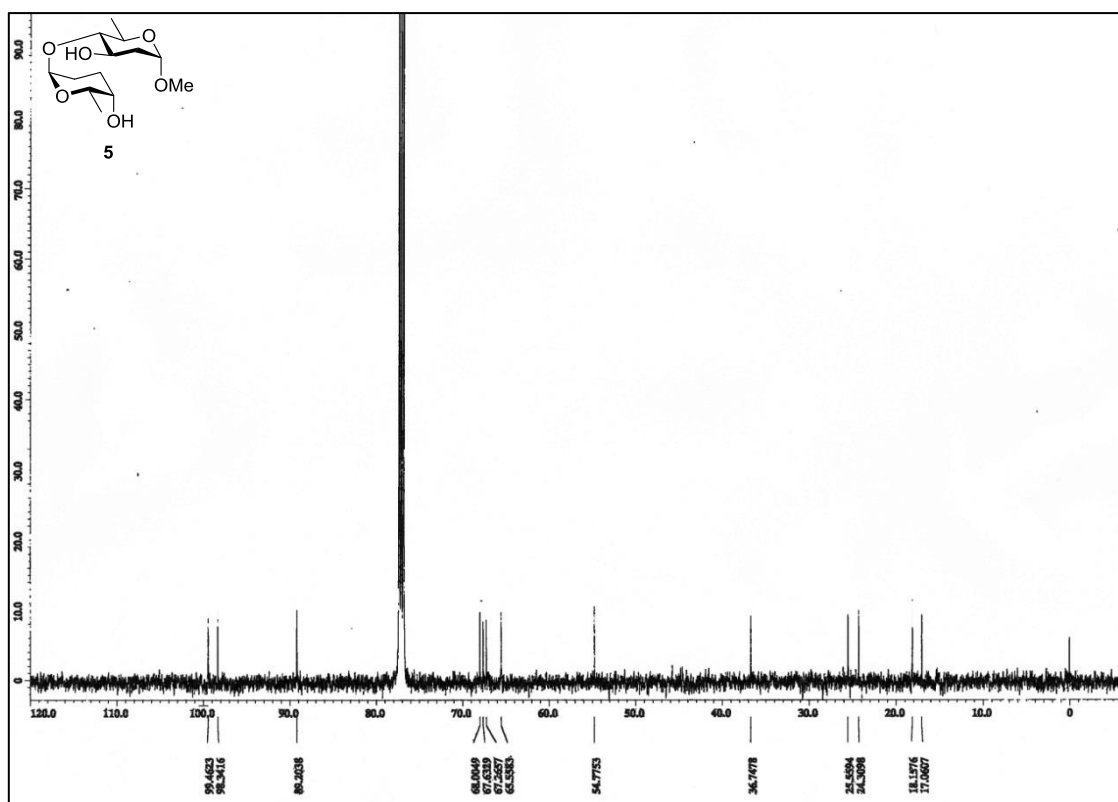

Figure S16 <sup>13</sup>C-NMR spectrum of 5

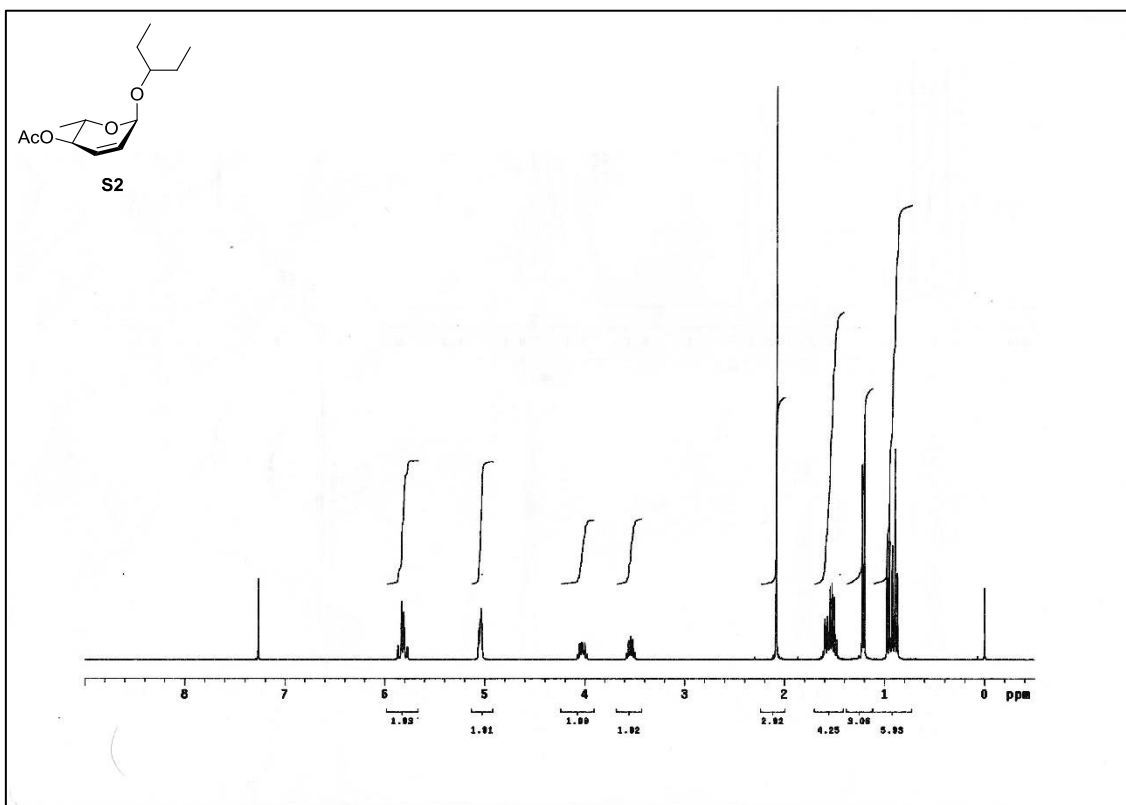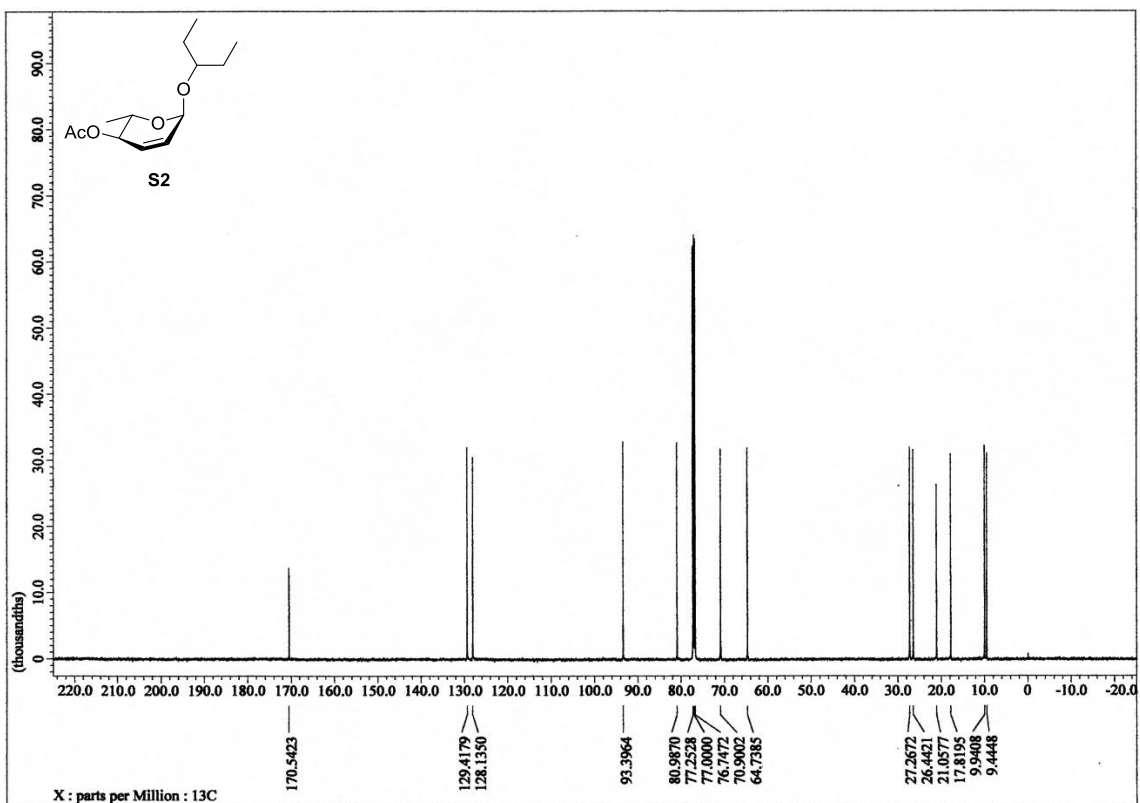



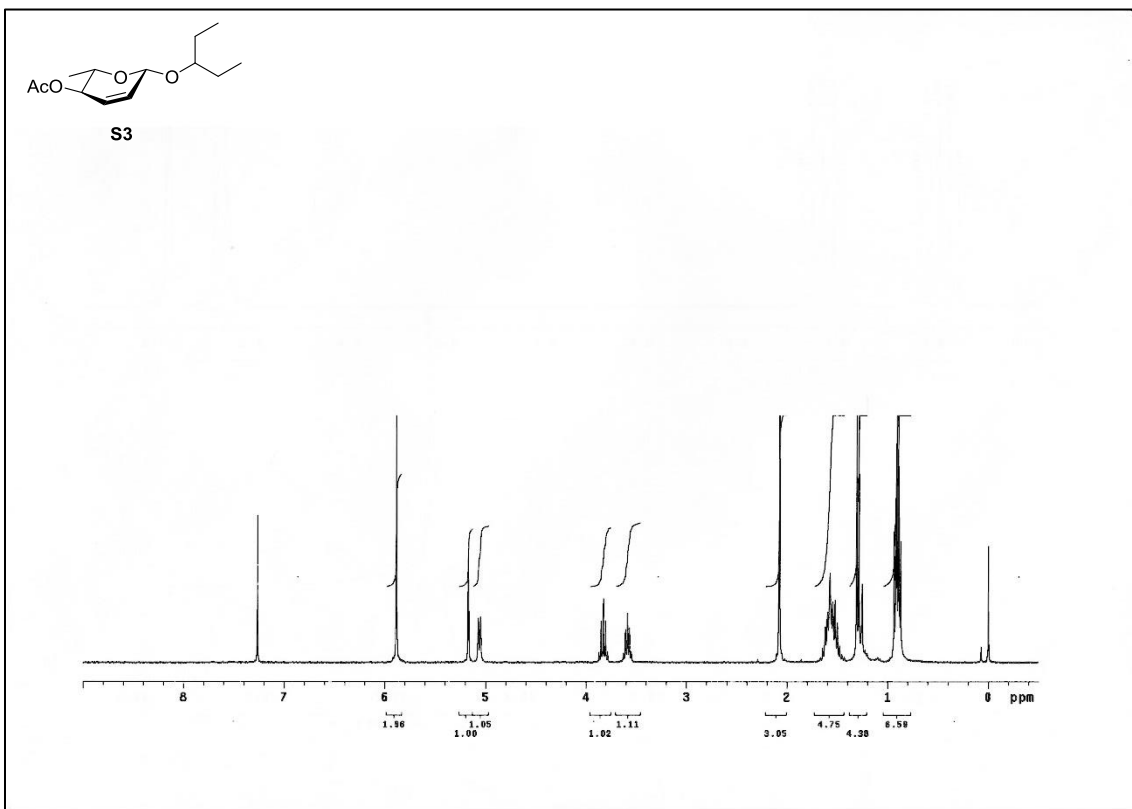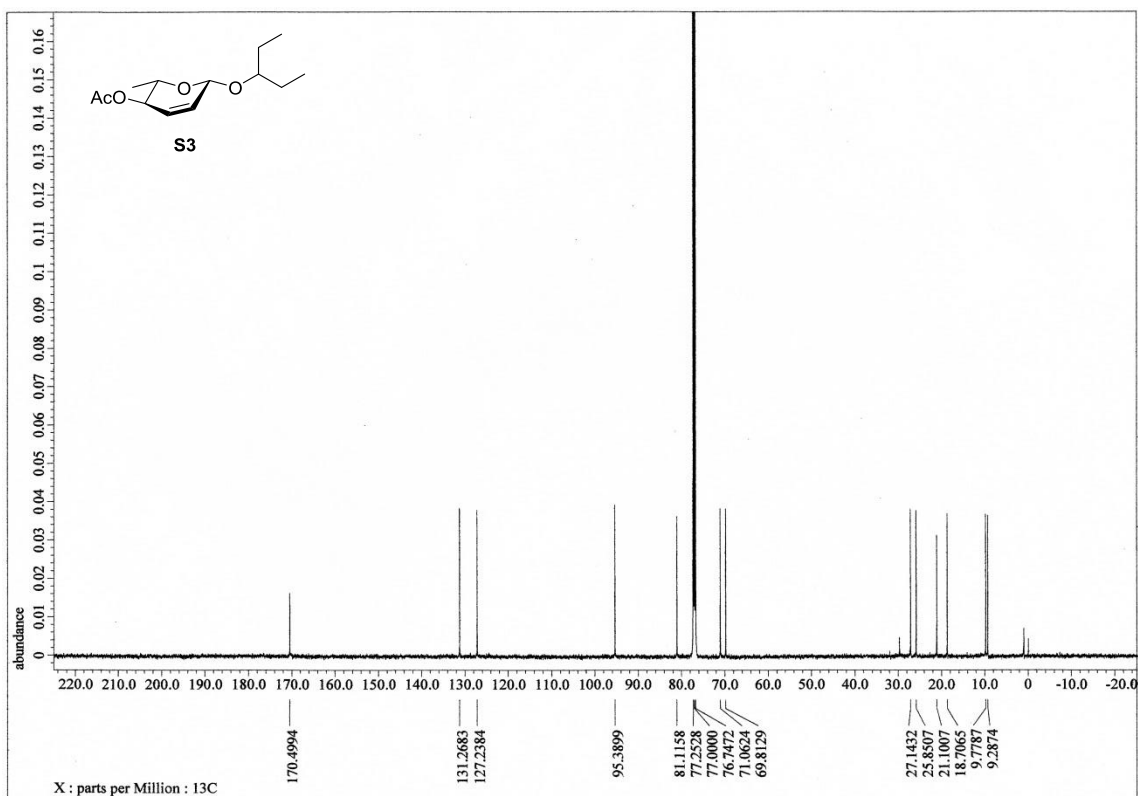

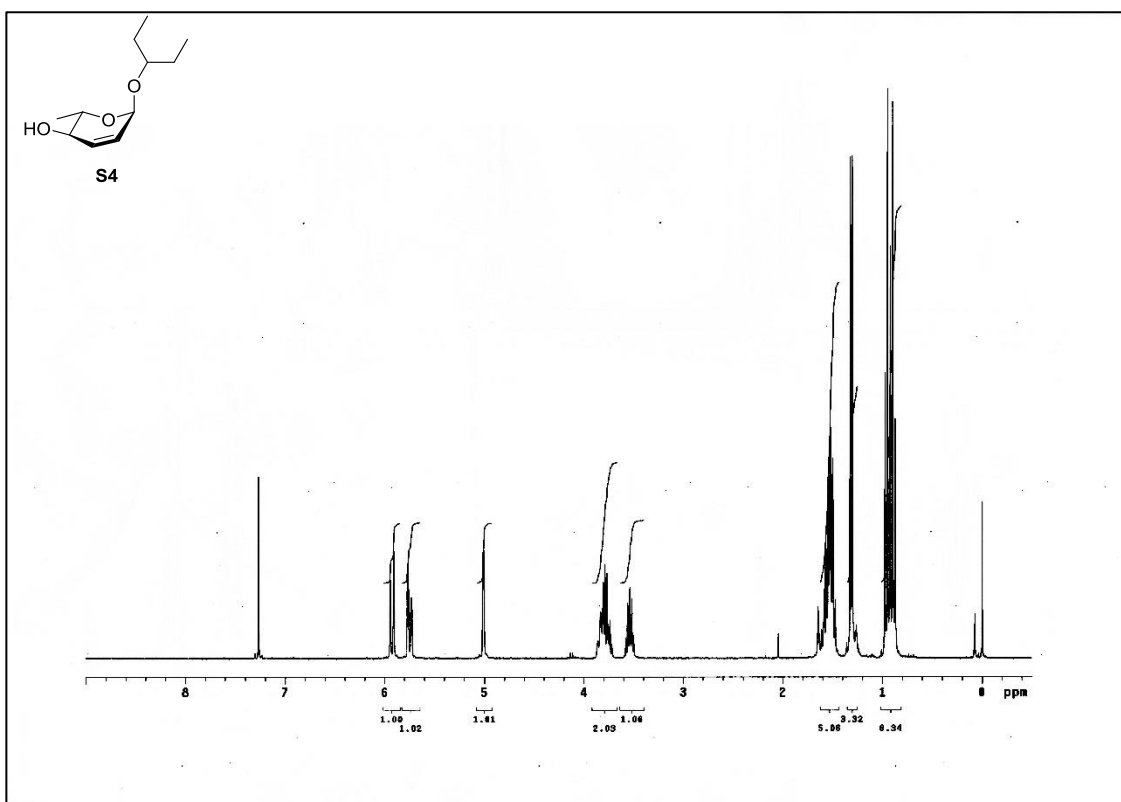

**Figure S21**  $^1\text{H-NMR}$  spectrum of S4

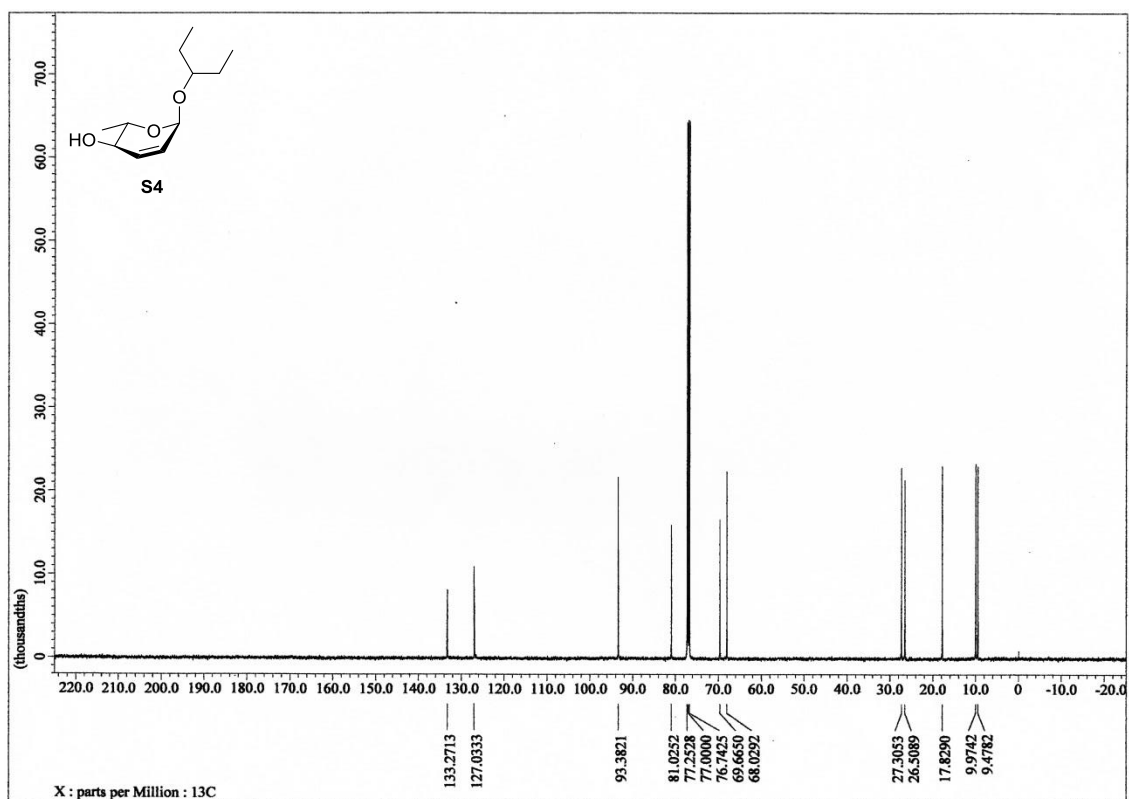

**Figure S22**  $^{13}\text{C-NMR}$  spectrum of S4

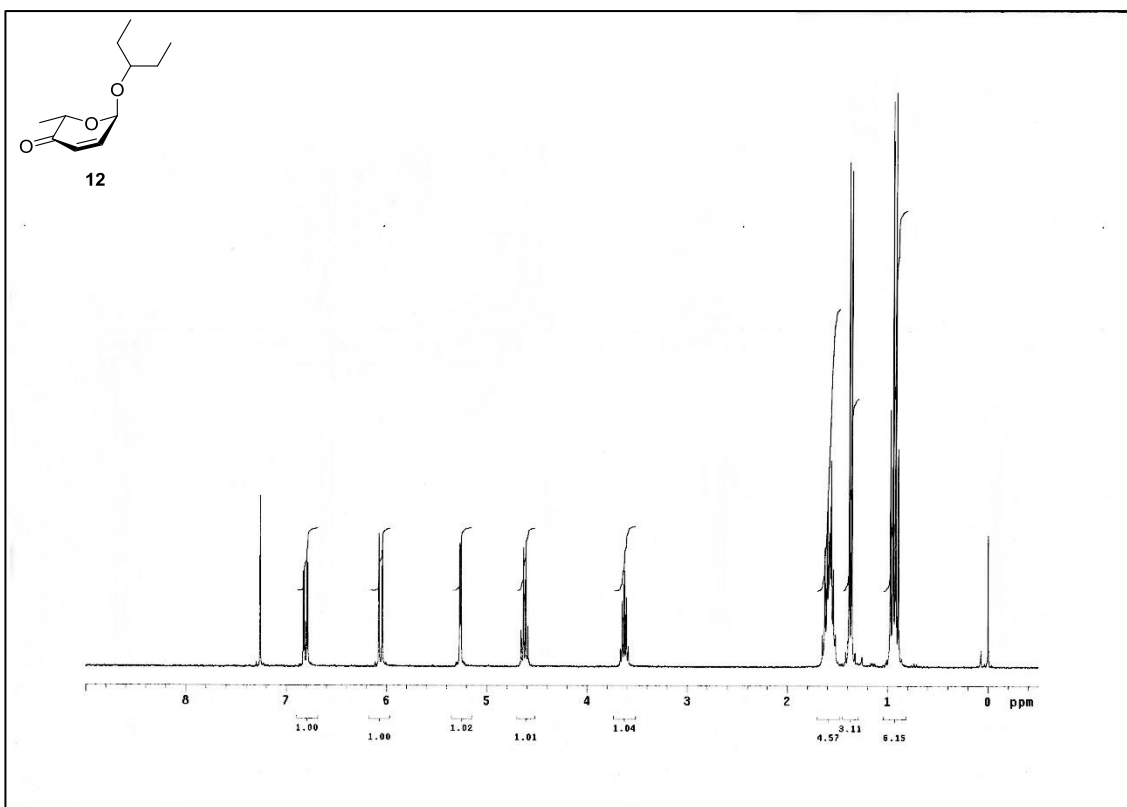

Figure S23 <sup>1</sup>H-NMR spectrum of 12

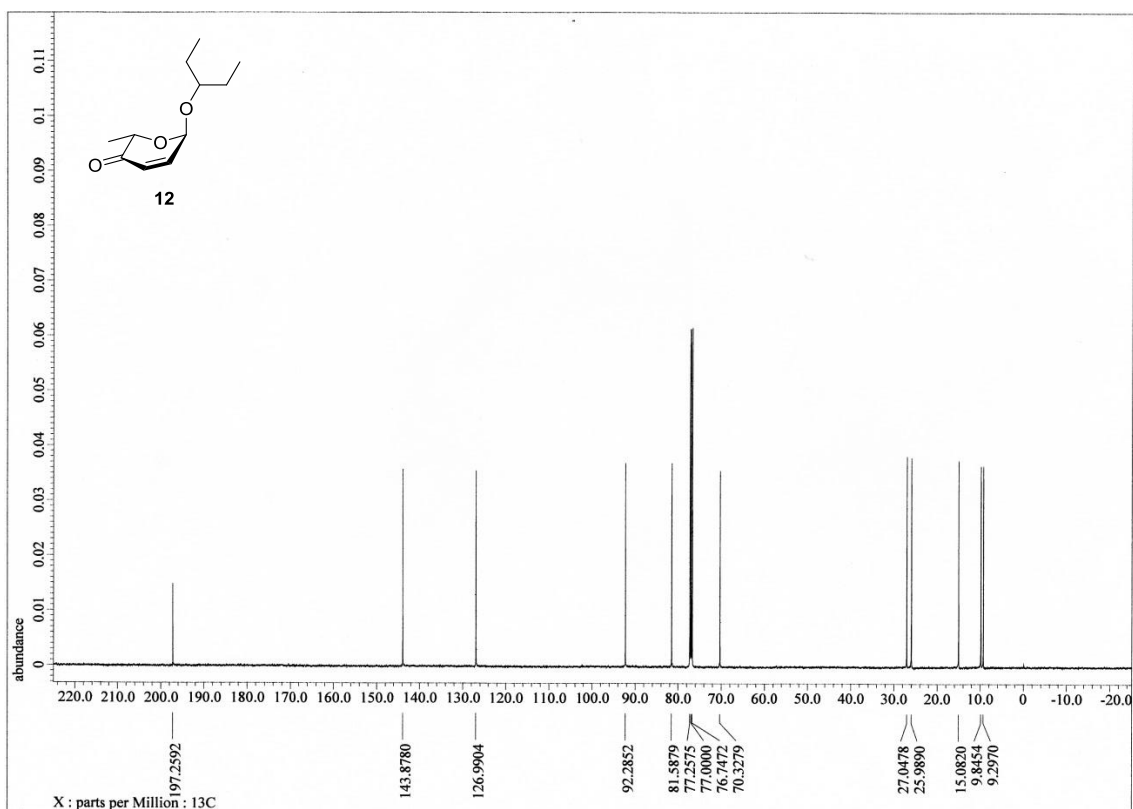

Figure S24 <sup>13</sup>C-NMR spectrum of 12

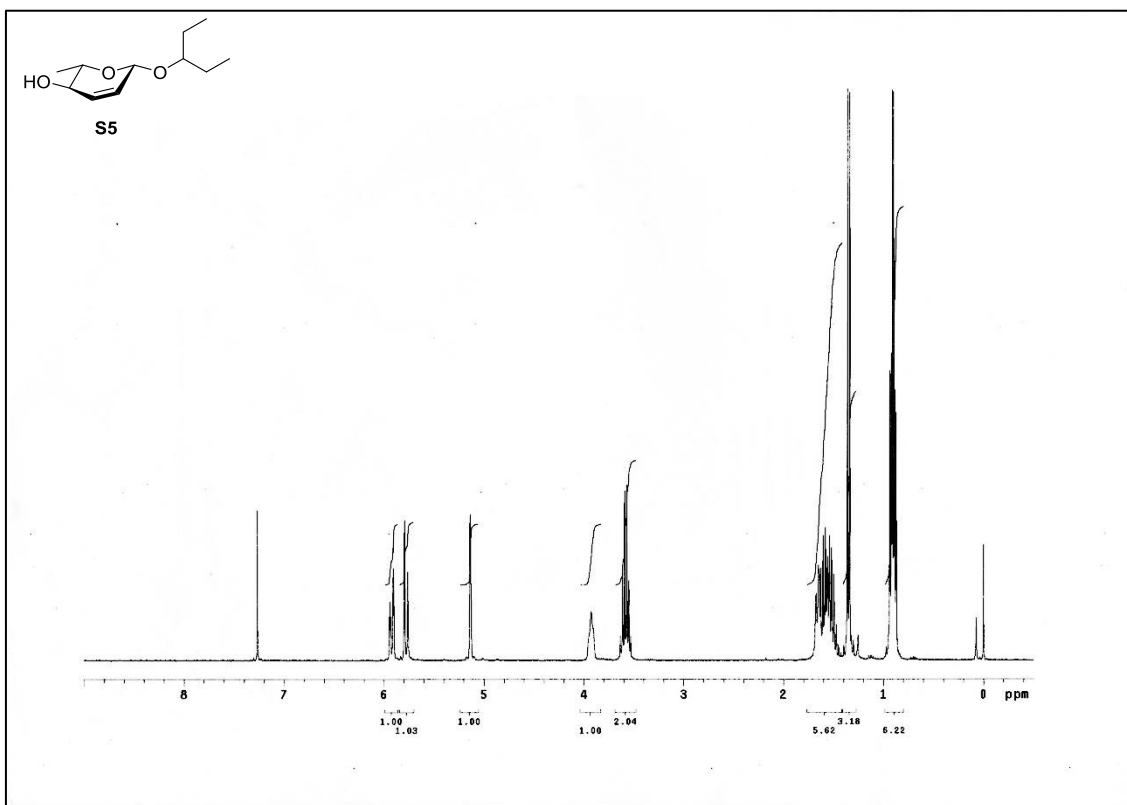

Figure S25  $^1\text{H}$ -NMR spectrum of S5

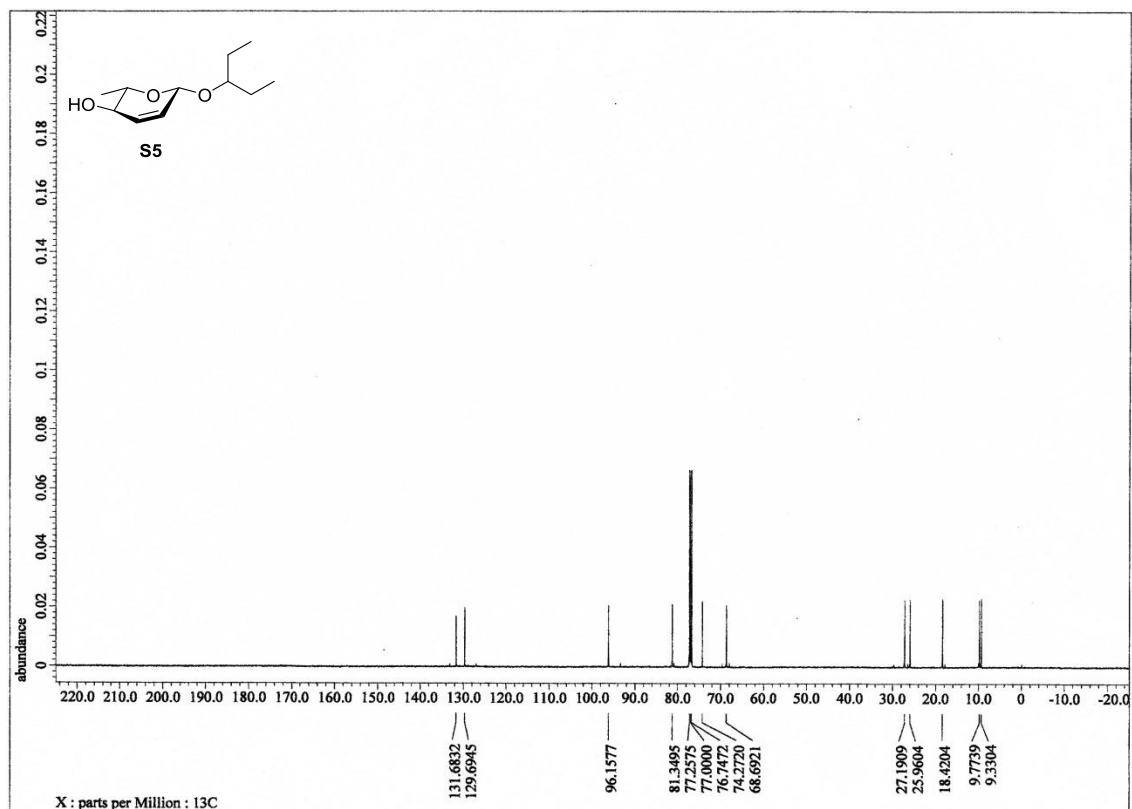

Figure S26  $^{13}\text{C}$ -NMR spectrum of S5

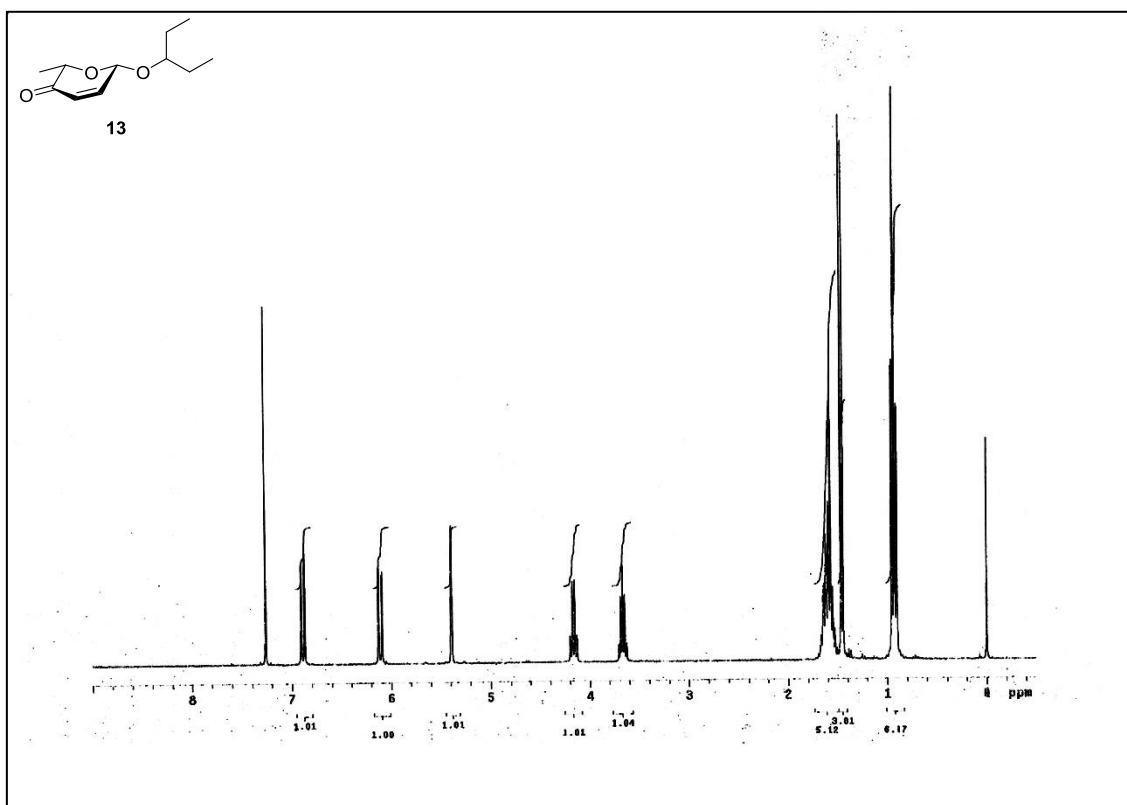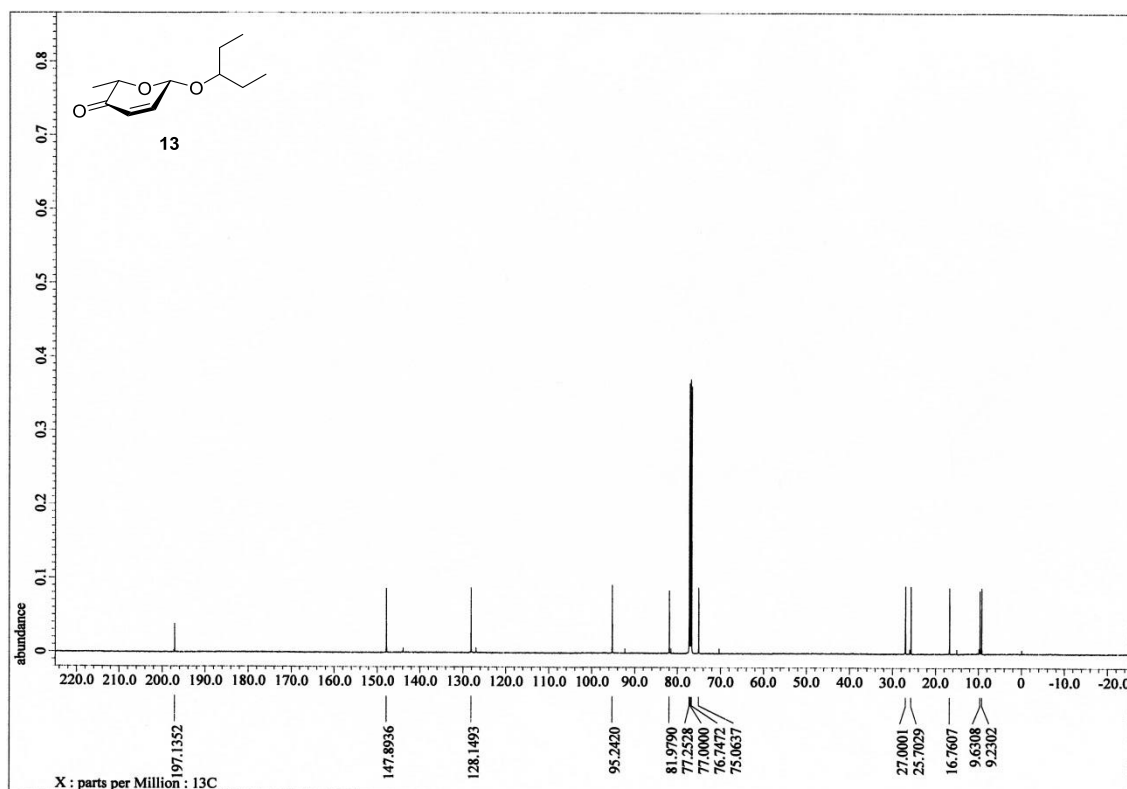

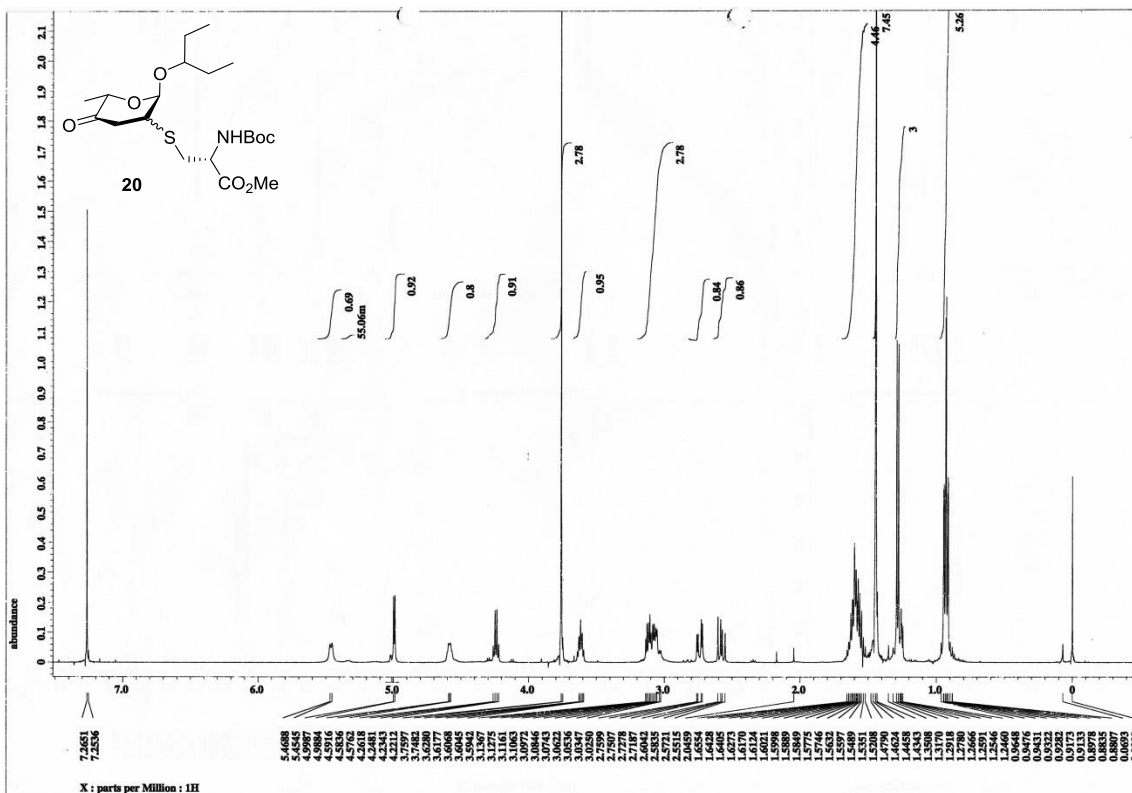

**Figure S29**  $^1\text{H-NMR}$  spectrum of **20**

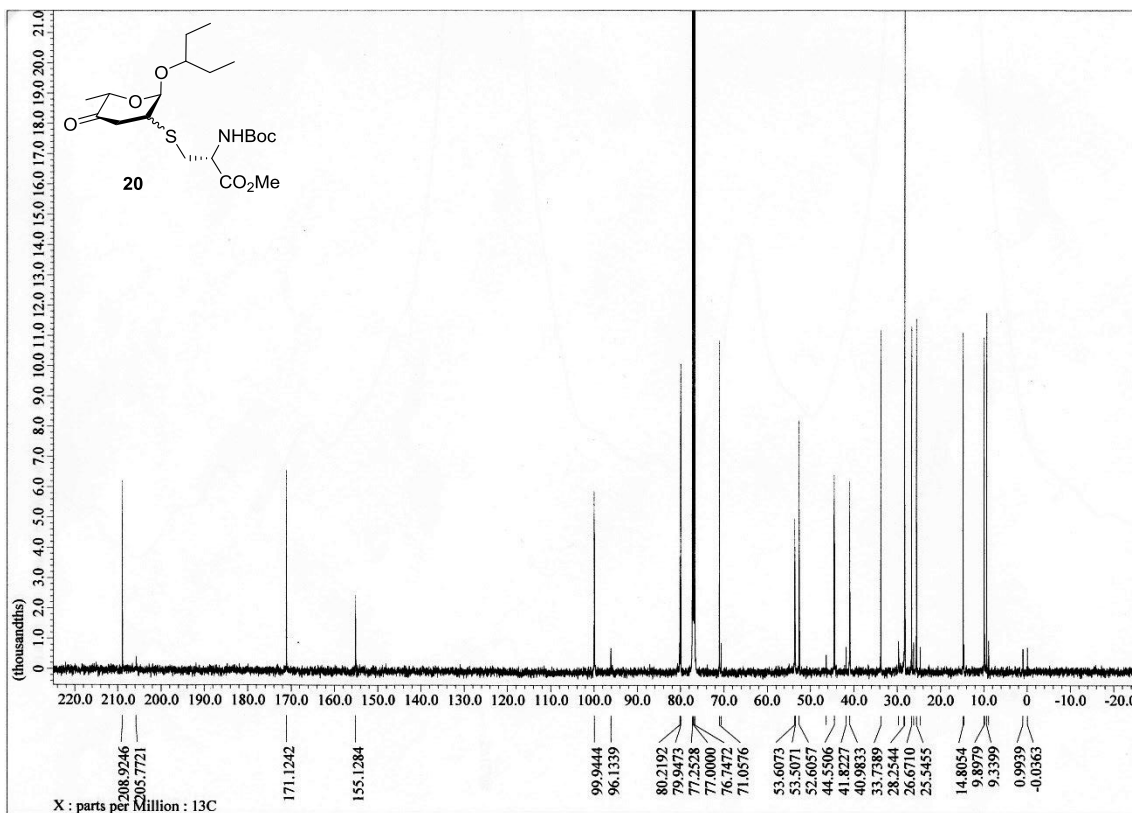

**Figure S30**  $^{13}\text{C-NMR}$  spectrum of **20**

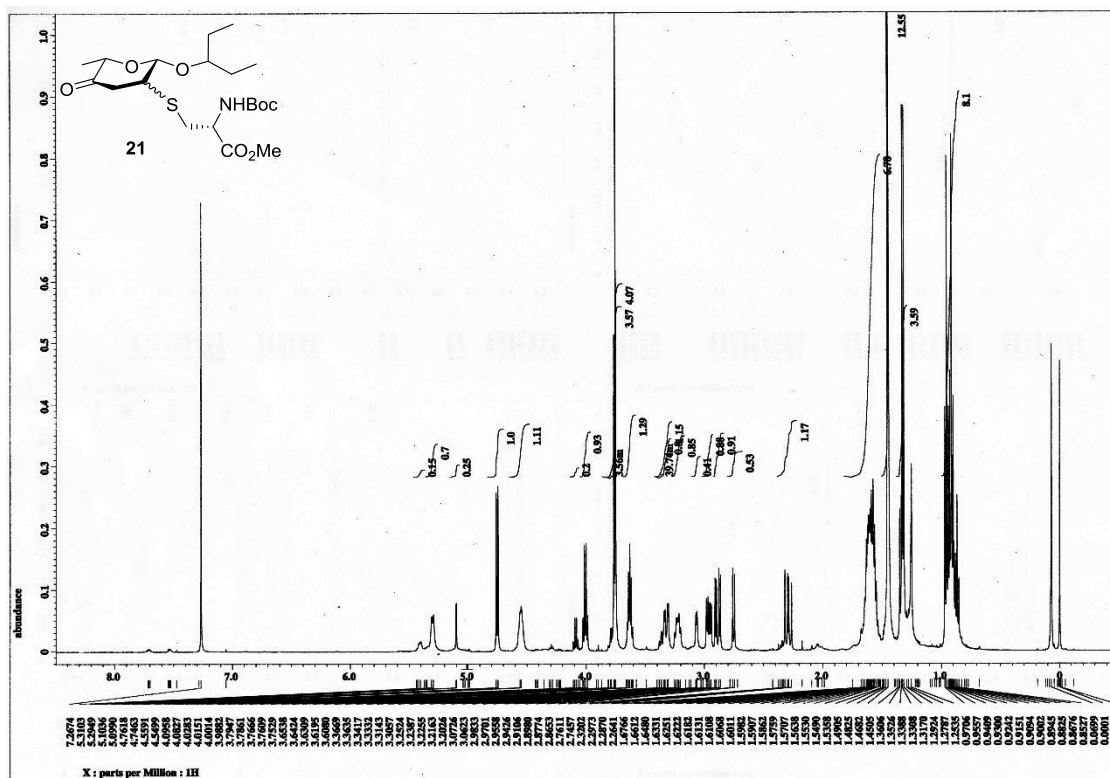

Figure S31  $^1\text{H-NMR}$  spectrum of 21

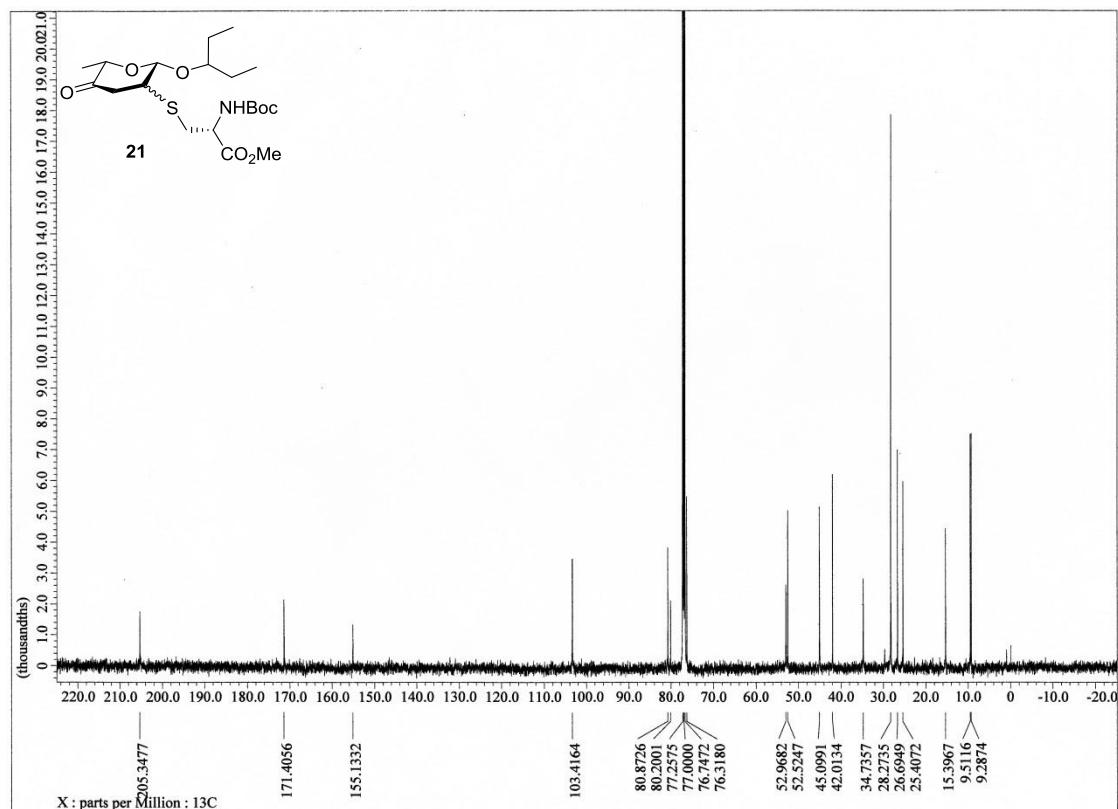

Figure S32  $^{13}\text{C-NMR}$  spectrum of 21

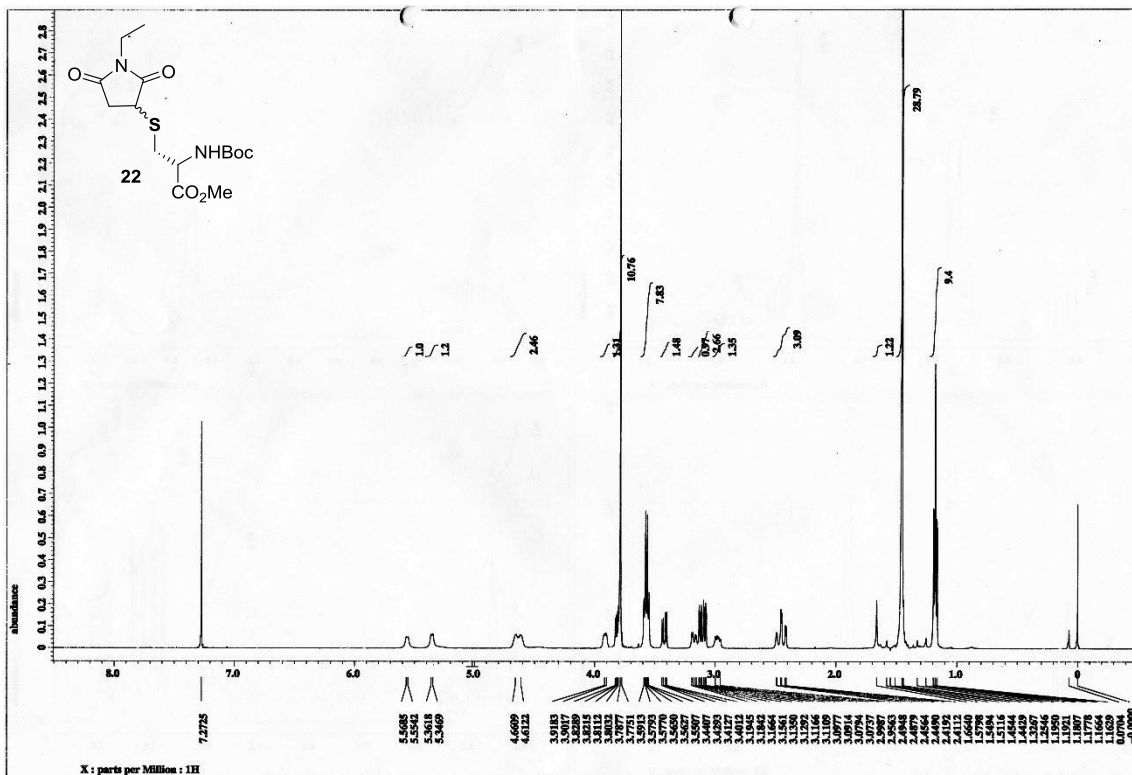

Figure S33 <sup>1</sup>H-NMR spectrum of 22

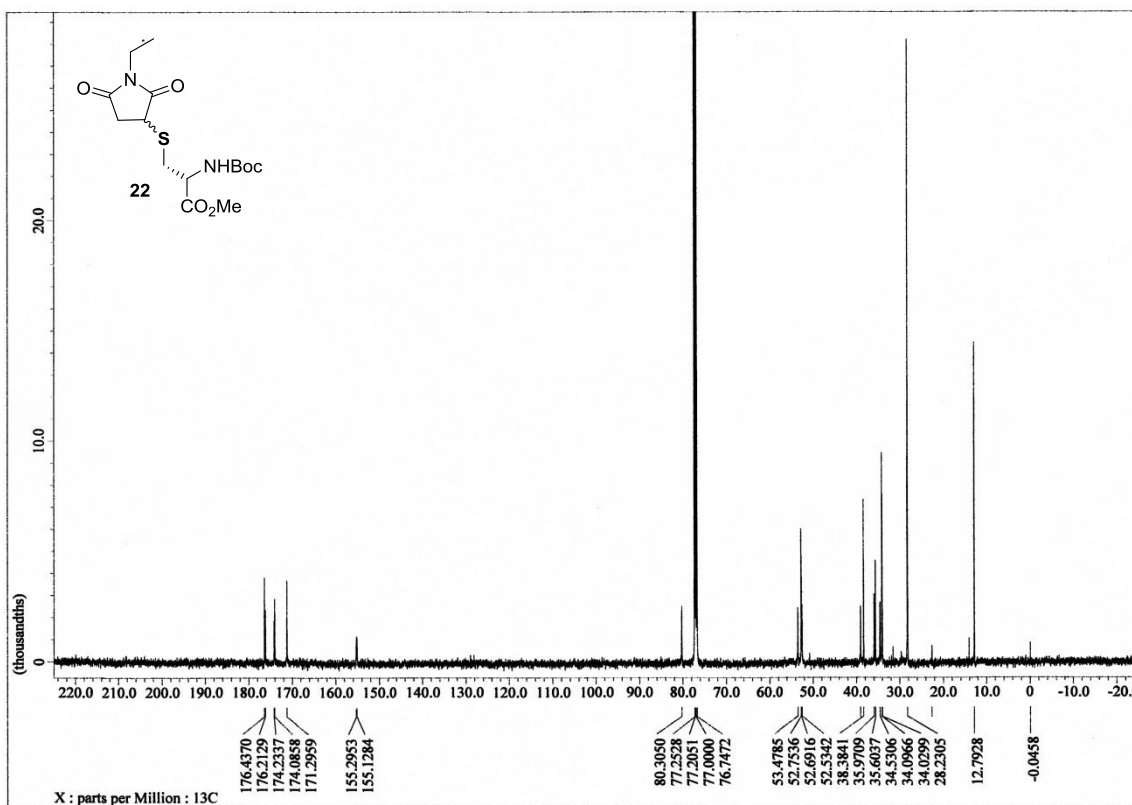

Figure S34 <sup>13</sup>C-NMR spectrum of 22



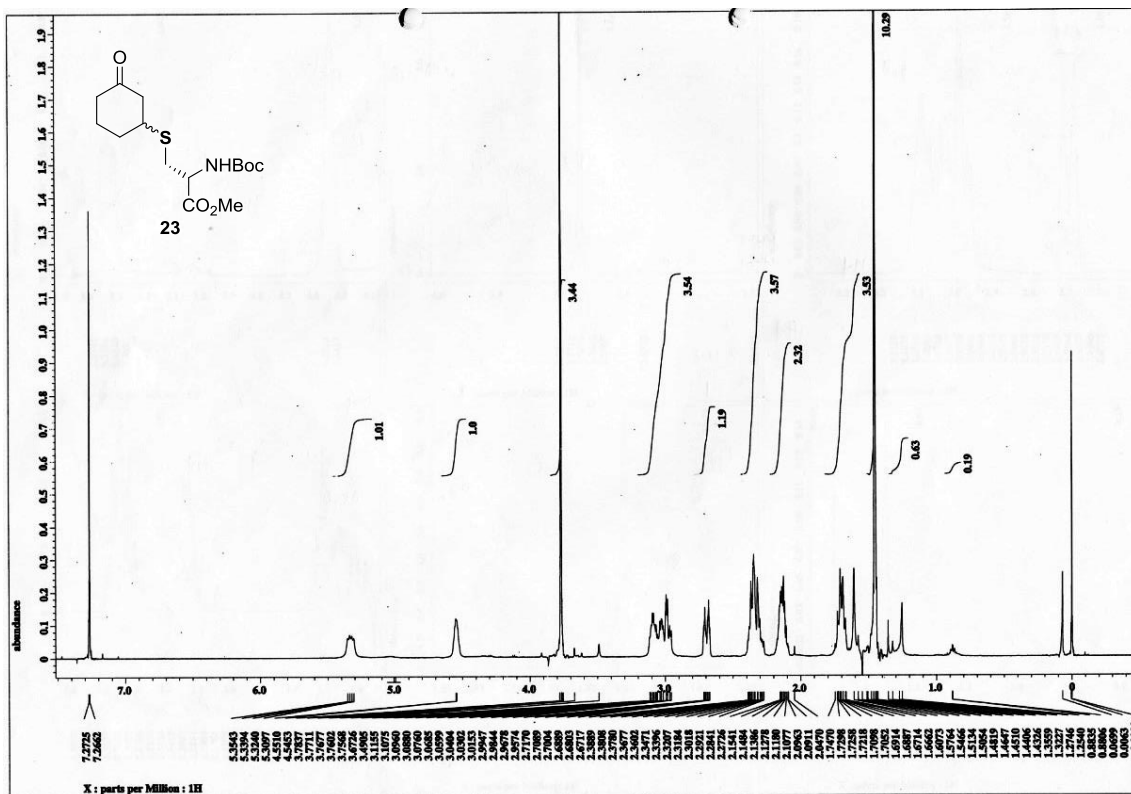

Figure S35 <sup>1</sup>H-NMR spectrum of 23

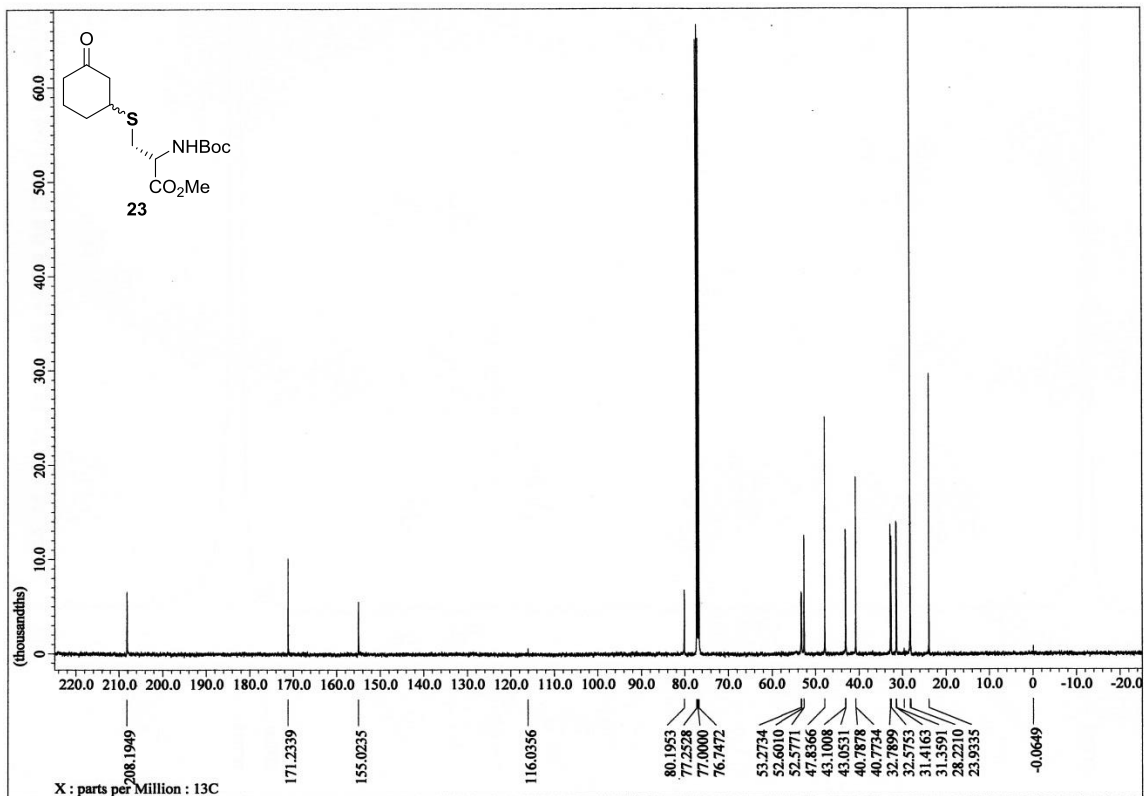

Figure S36 <sup>13</sup>C-NMR spectrum of 23

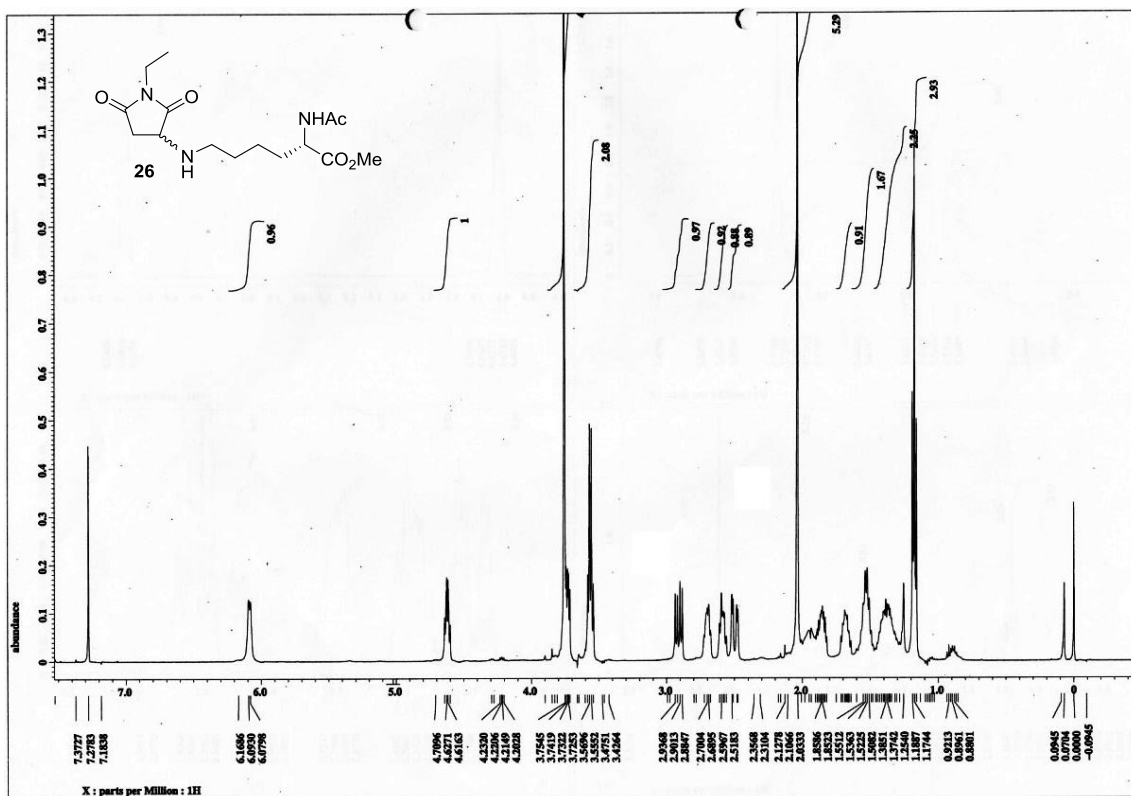

Figure S37 <sup>1</sup>H-NMR spectrum of 26

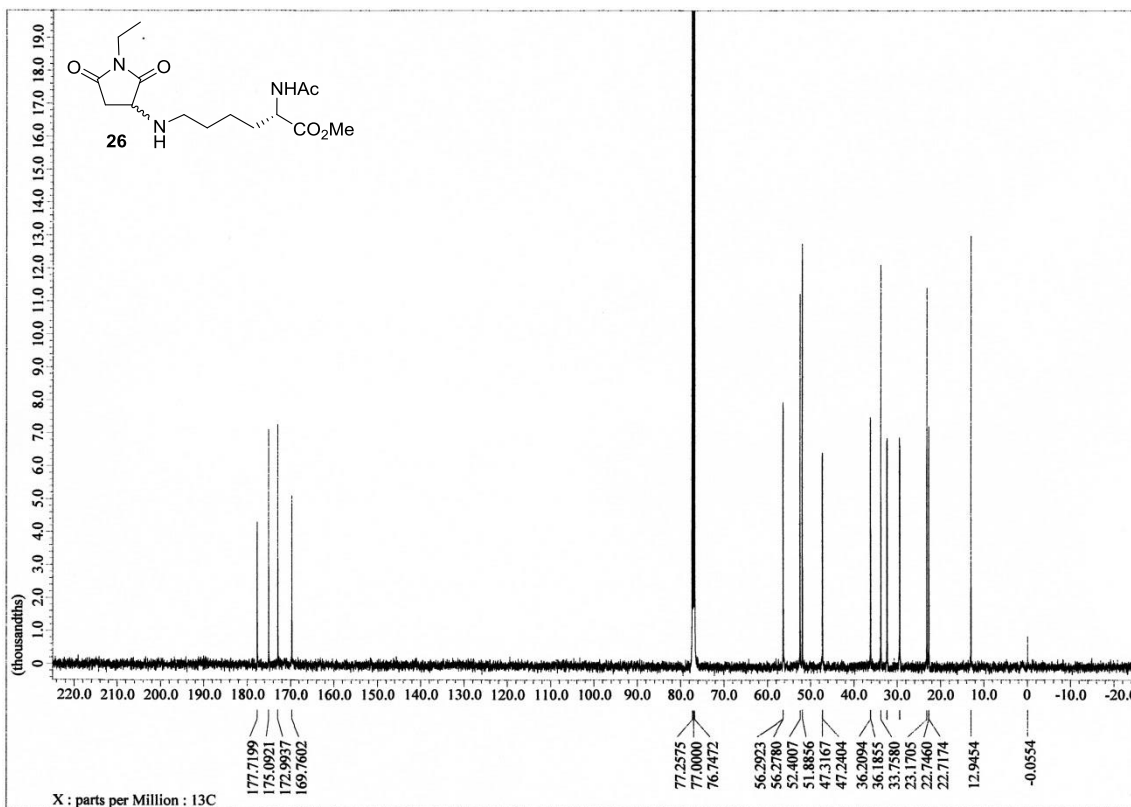

Figure S38 <sup>13</sup>C-NMR spectrum of 26

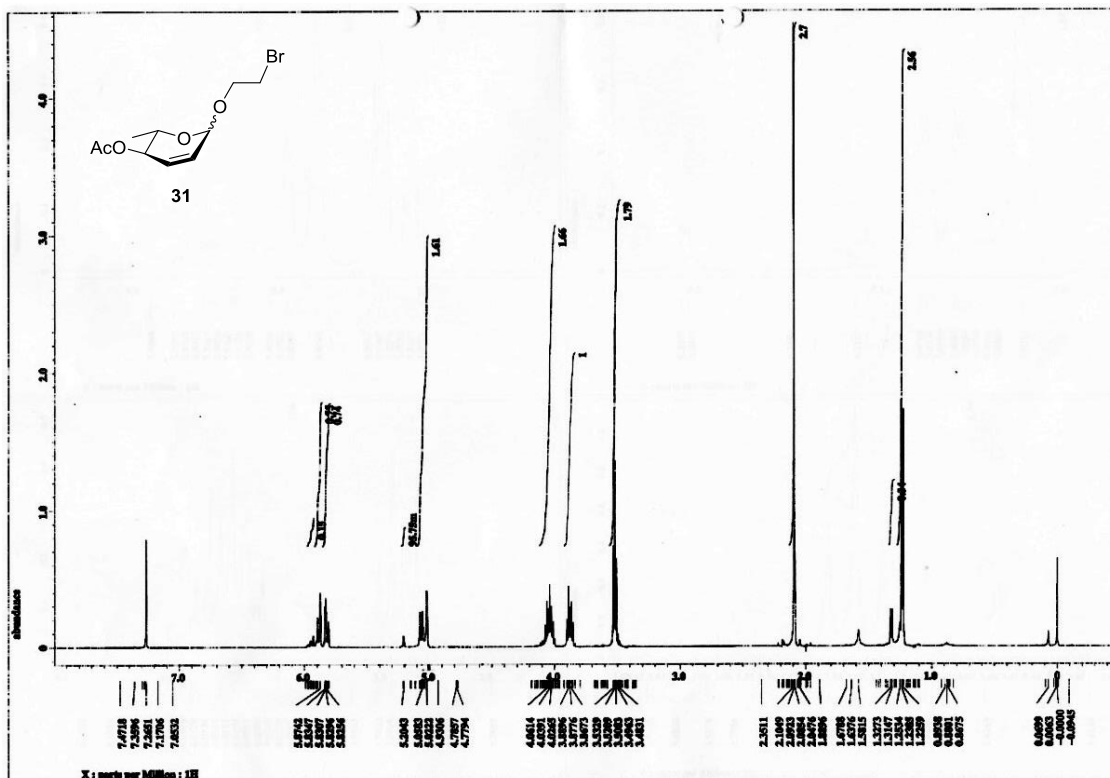

Figure S39 <sup>1</sup>H-NMR spectrum of 31

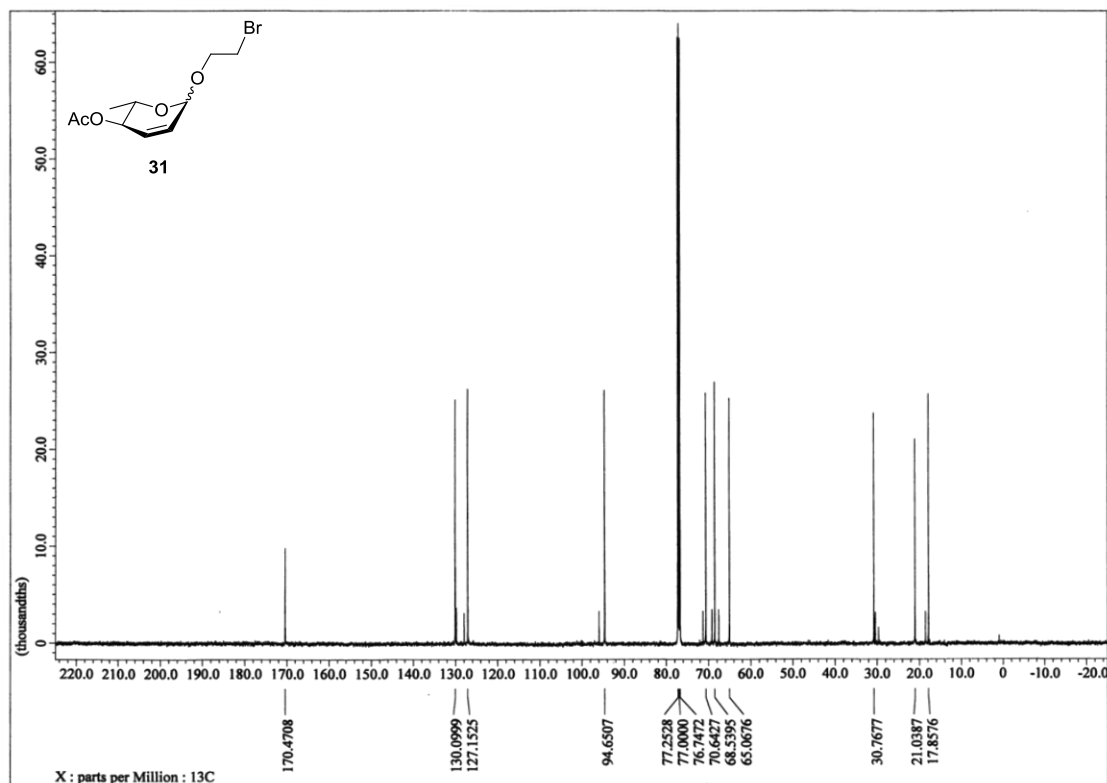

Figure S40 <sup>13</sup>C -NMR spectrum of 31

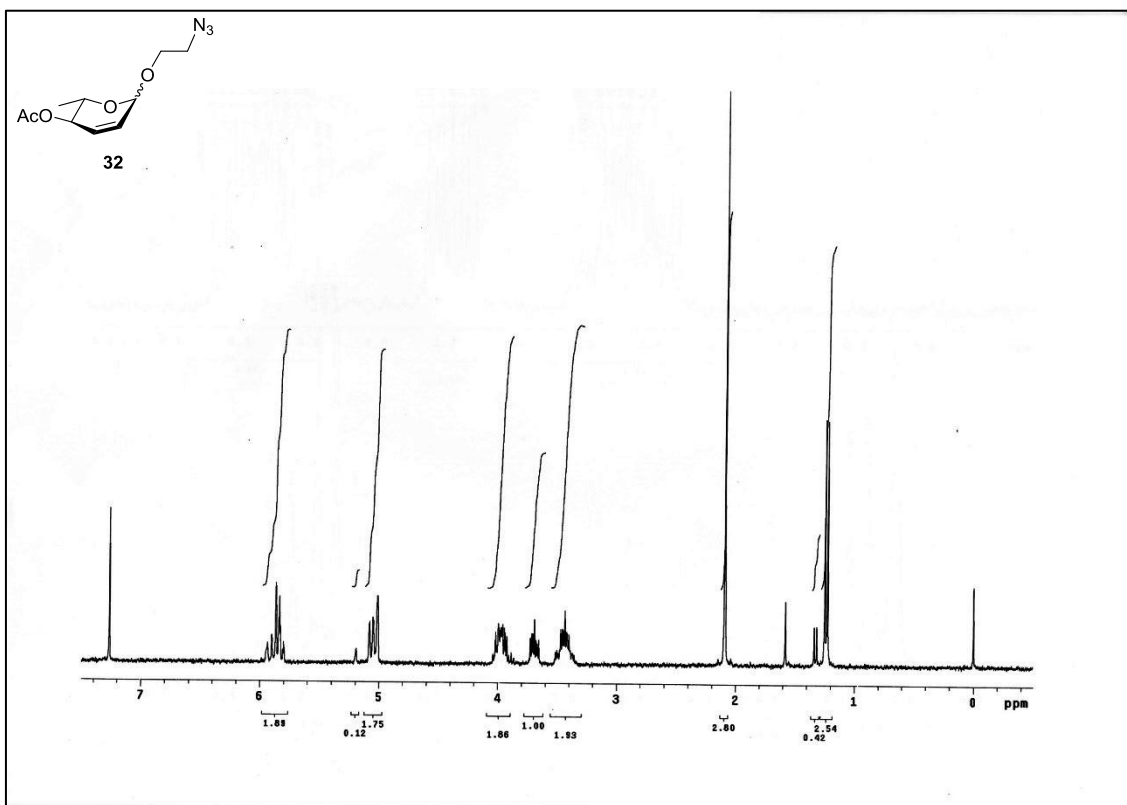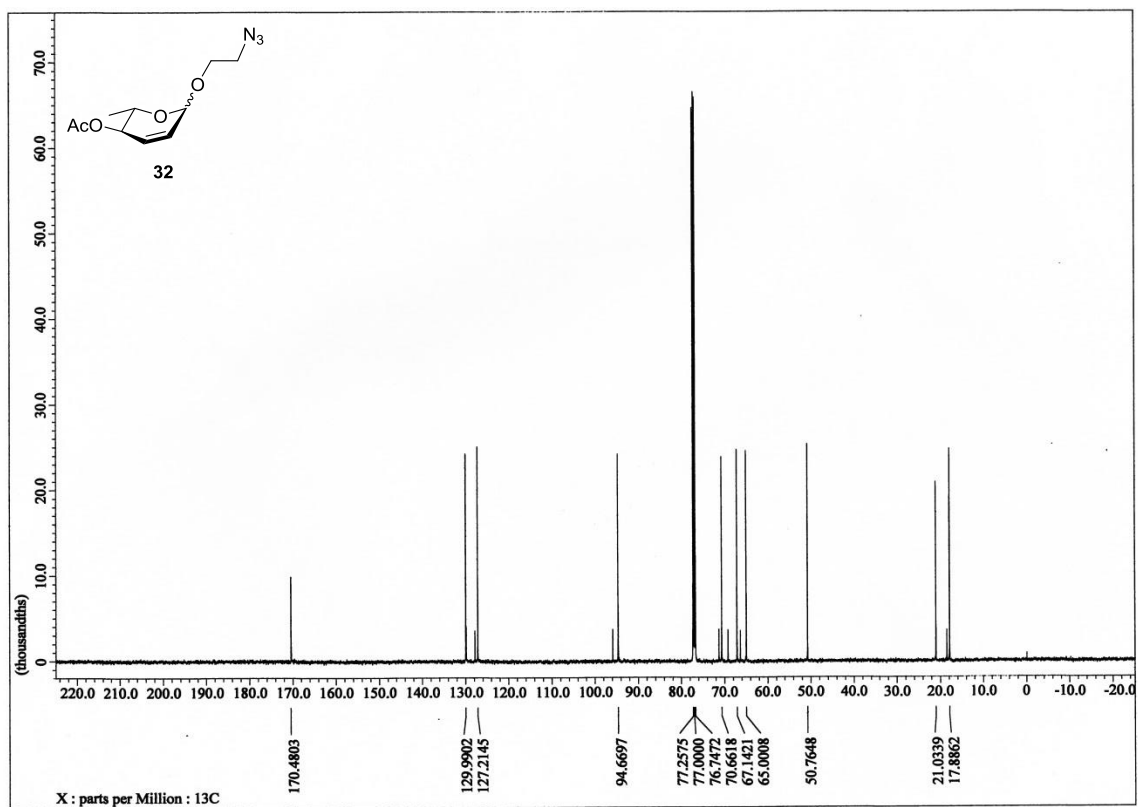

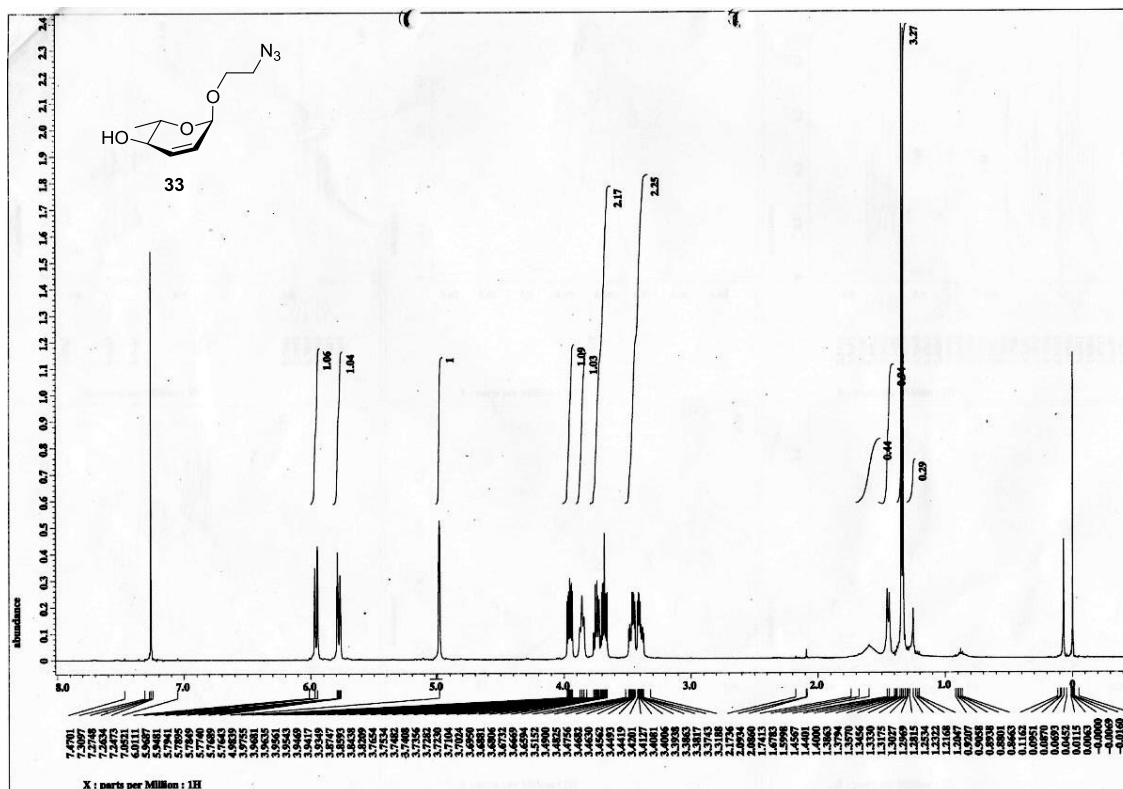

Figure S43  $^1\text{H}$ -NMR spectrum of 33

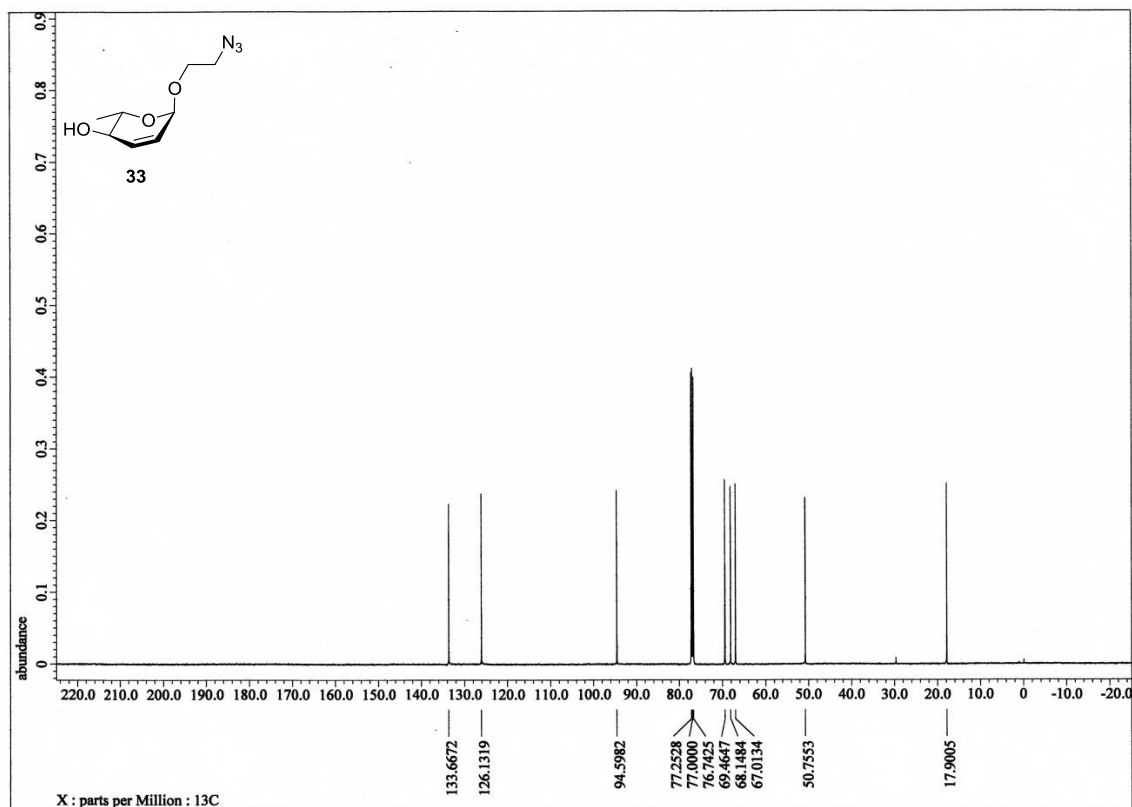

Figure S44  $^{13}\text{C}$ -NMR spectrum of 33

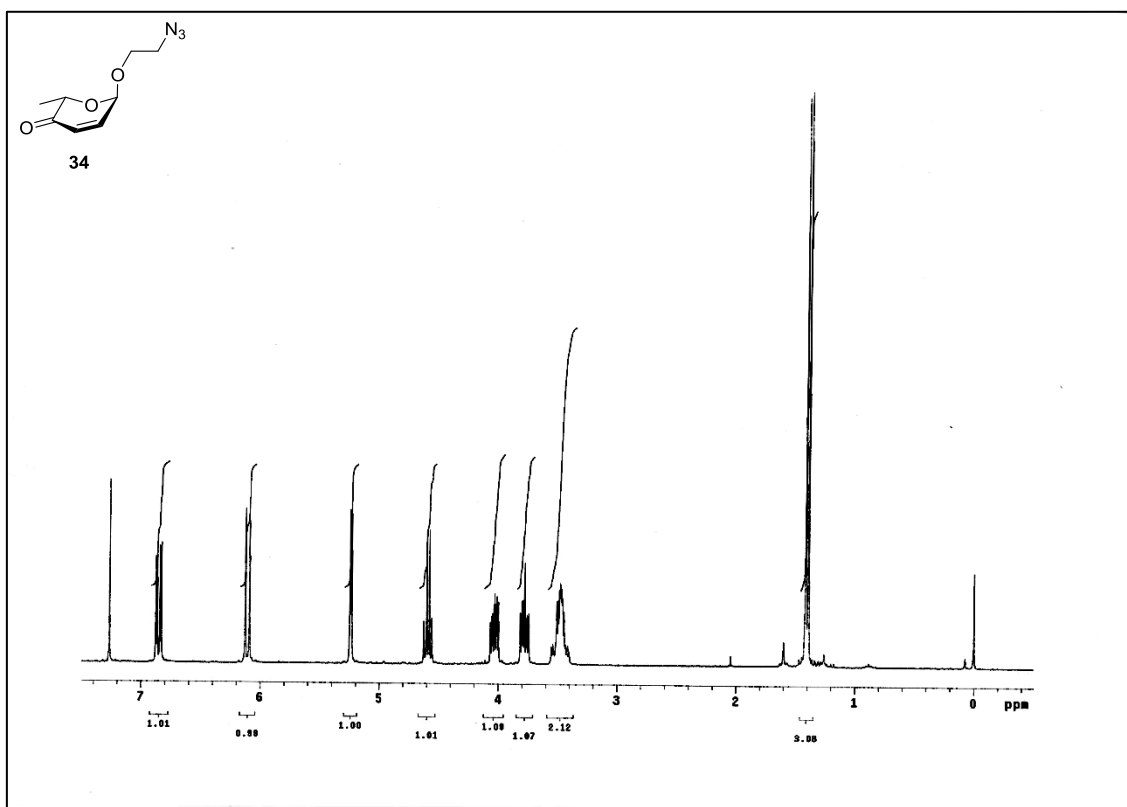

**Figure S45**  $^1\text{H-NMR}$  spectrum of 34

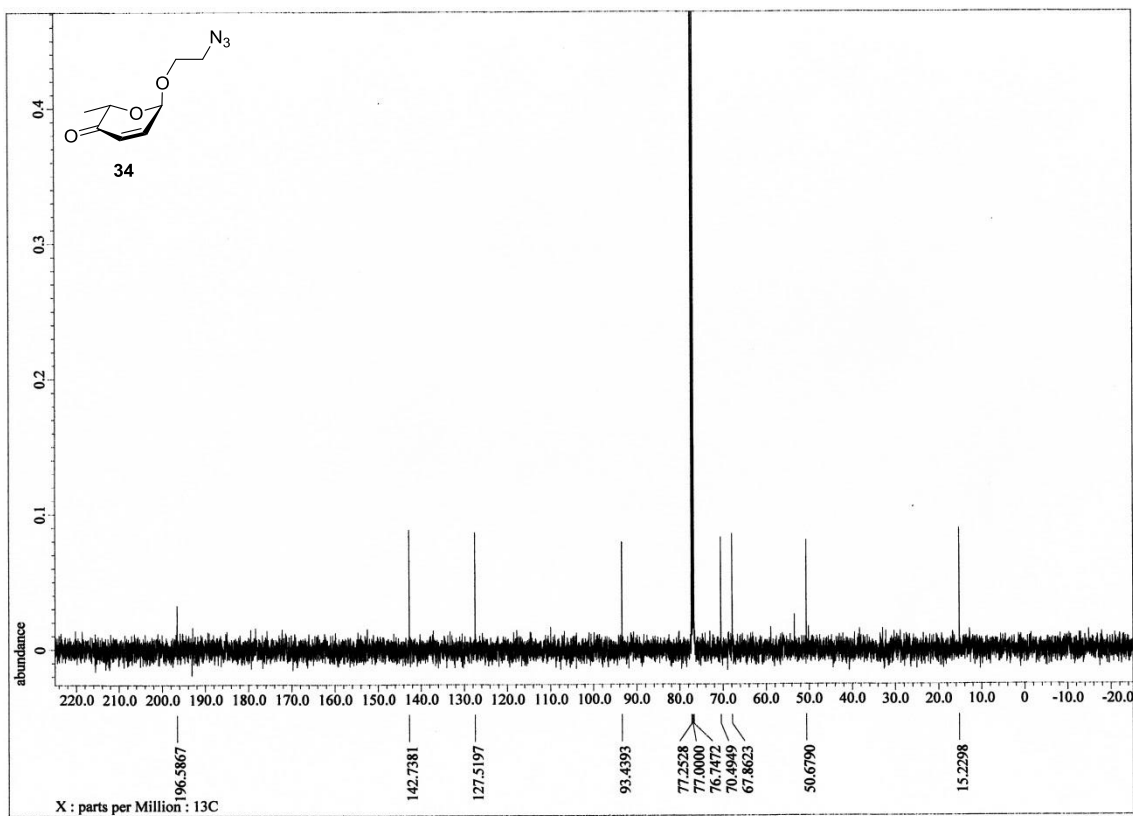

**Figure S46**  $^{13}\text{C-NMR}$  spectrum of 34

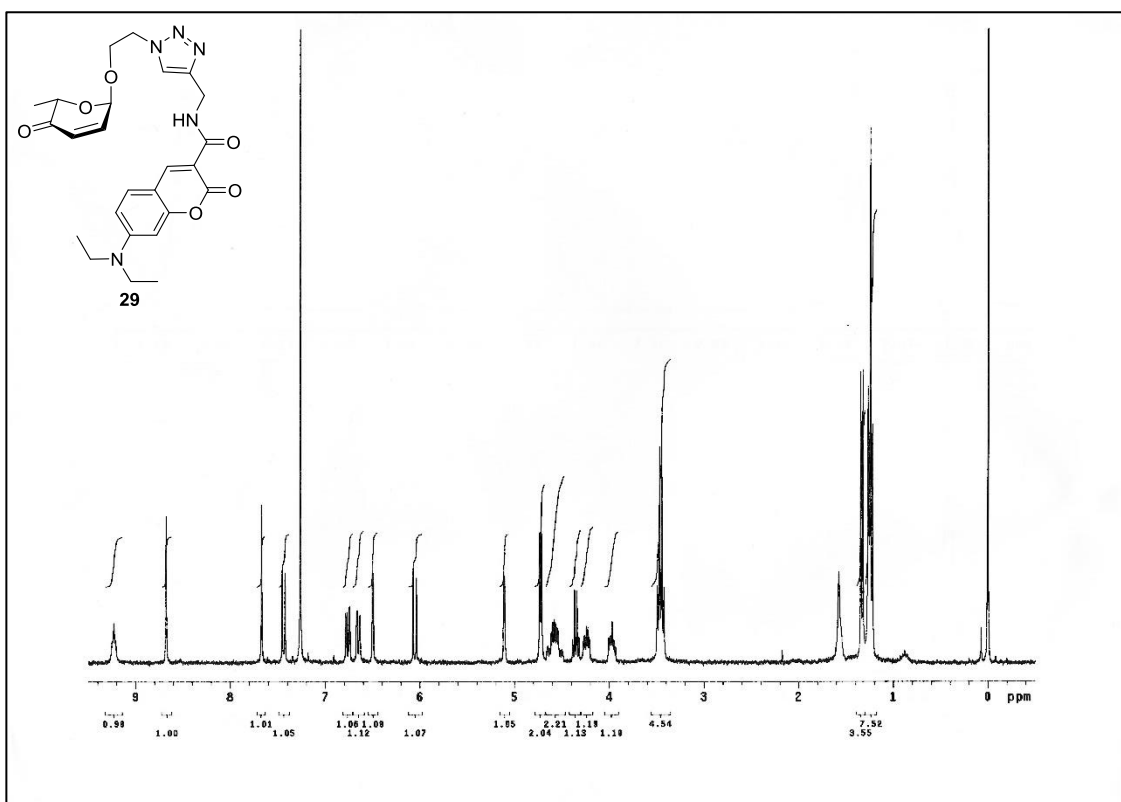

Figure S47  $^1\text{H-NMR}$  spectrum of **29**

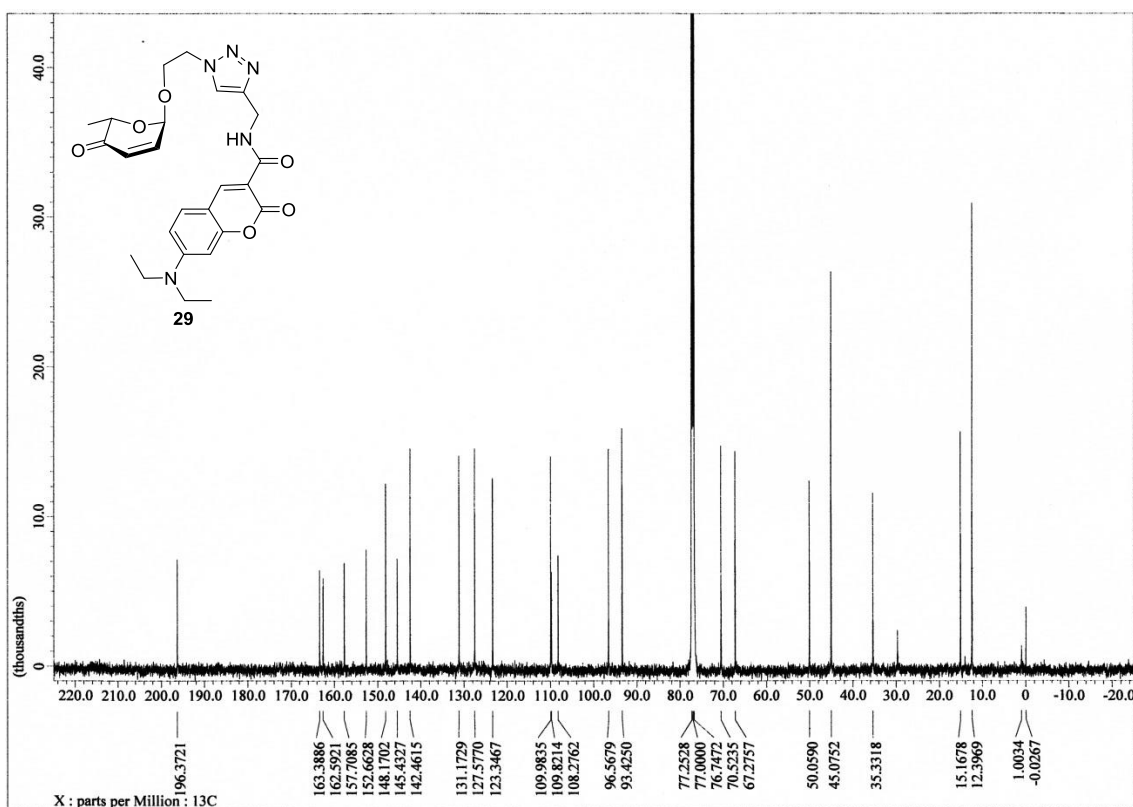

Figure S48  $^{13}\text{C-NMR}$  spectrum of **29**

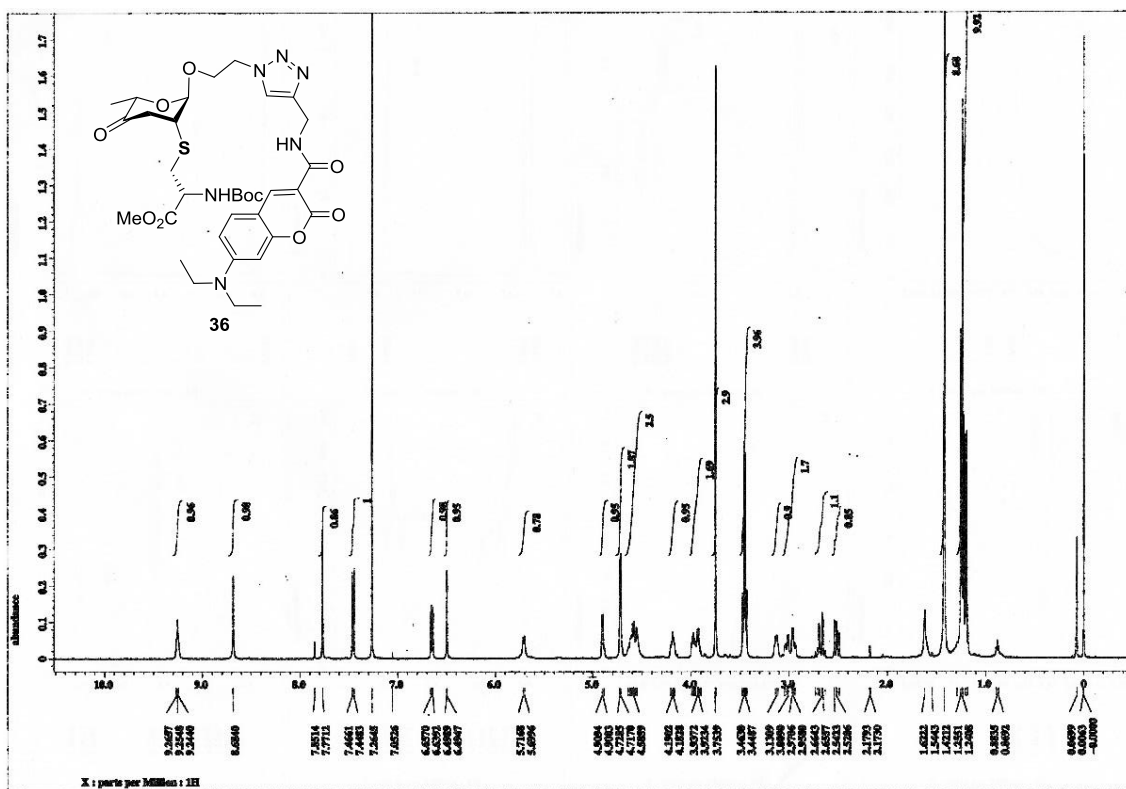

Figure S49 <sup>1</sup>H-NMR spectrum of 36

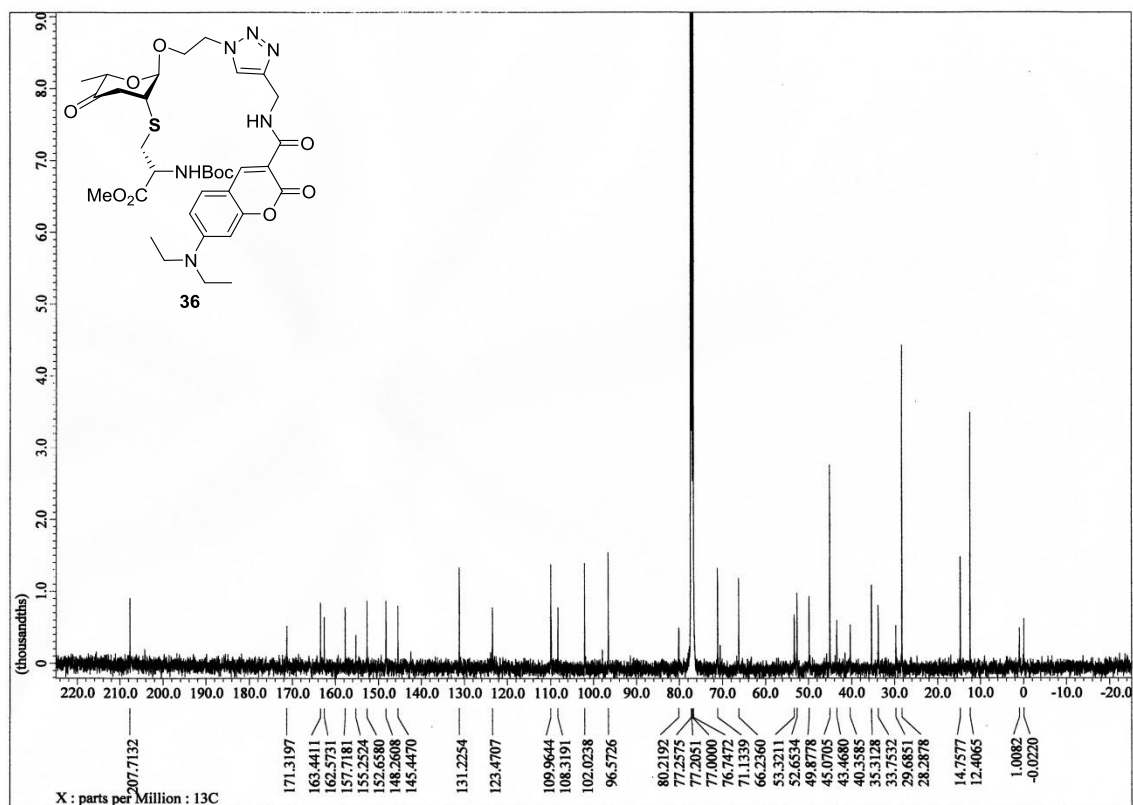

Figure S50 <sup>13</sup>C-NMR spectrum of 36
